# Supplementary material for: A Coding Single-Nucleotide Polymorphism in Lysine Demethylase KDM4A Associates with Increased Sensitivity to mTOR Inhibitors
Source: Oxford University Press journal article supplement (doi:10.1158/2159-8290.cd-14-1159), 2015-01-06
Supplement: 21598290cd141159-sup-138784_1_table_2773909_ng50q2.xlsx [file 21598290cd141159-sup-138784_1_table_2773909_ng50q2.xlsx]

## Sheet: Drug_sensitivity_Data
CellID	Genotype	Cpd#	CellLine_name	CompoundName	HighConc_Viability Ratio	MedConc_Viability Ratio	LowConc_Viability Ratio
701	HET	73	NCI-H841	MKC-1	0.102	0.172	1.045
701	HET	52	NCI-H841	KIN001-013	1.017	1.117	1.053
701	HET	66	NCI-H841	HG-3-32-01	0.826	0.903	0.907
701	HET	20	NCI-H841	Geldanamycin	0.589	0.777	0.703
701	HET	63	NCI-H841	KIN001-127	1.086	1.149	1.043
701	HET	64	NCI-H841	KIN001-128	0.977	1.08	1.052
701	HET	6	NCI-H841	PHA665752	0.91	0.992	1.03
701	HET	119	NCI-H841	Lapatinib	0.8449	0.8455	0.9254
701	HET	94	NCI-H841	TXG 221	0.923	0.961	0.956
701	HET	95	NCI-H841	DM3189	0.805	1.019	0.923
821	HET	83	NCI-H1793	JW-7-52-1	0.212	0.191	0.337
701	HET	99	NCI-H841	AZD6474/Zactema	0.2139	0.8887	0.9931
701	HET	97	NCI-H841	AZD6244	0.7581	0.8537	0.8898
701	HET	104	NCI-H841	Bortezomib/Velcade	0.1429	1.1937	1.2759
701	HET	84	NCI-H841	AZ960	0.549	0.938	0.985
701	HET	17	NCI-H841	Cyclopamine	0.897	1.064	1.251
701	HET	35	NCI-H841	KIN0001-017	0.902	0.902	0.902
856	HET	83	HCC-366	JW-7-52-1	0.022	0.097	0.383
701	HET	71	NCI-H841	Primethamine	0.722	1.126	1.071
701	HET	45	NCI-H841	Z-L-L-Norleucine-CHO	0.857	0.954	1.126
701	HET	32	NCI-H841	KIN0001-006	0.619	0.73	0.599
701	HET	37	NCI-H841	KIN0001-023	0.95	0.938	1.018
701	HET	68	NCI-H841	BAY-1942	0.915	1.071	1.075
701	HET	93	NCI-H841	KIN001-138	0.658	0.9	0.953
701	HET	30	NCI-H841	Sorafenib	0.929	1	1.065
701	HET	109	NCI-H841	Honokiol	0.0168	0.8539	1.1323
701	HET	36	NCI-H841	KIN0001-022	1.038	1.169	1.095
701	HET	111	NCI-H841	Salubrinal	0.3074	0.9595	0.9697
701	HET	11	NCI-H841	Taxol	0.2	0.477	0.361
701	HET	80	NCI-H841	MRK 003	0.9439	1.0124	1.1304
701	HET	105	NCI-H841	MLN4924	0.7508	0.9607	1.2218
701	HET	9	NCI-H841	MG-132	0.957	1.107	1.1
701	HET	91	NCI-H841	KIN-001-135	0.983	1.038	0.89
701	HET	56	NCI-H841	KIN001-112/WH-4-023	0.872	1.09	0.92
701	HET	62	NCI-H841	KIN001-126	0.981	1.109	1.097
701	HET	38	NCI-H841	KIN0001-045	0.885	0.776	1.02
701	HET	51	NCI-H841	KIN001-005/BMS354825/Dasatinib	0.677	0.703	0.76
701	HET	86	NCI-H841	KIN001-139	0.214	0.912	0.982
701	HET	98	NCI-H841	AZD1152	0.5406	0.6345	0.5929
701	HET	88	NCI-H841	MS275	NA	0.781	0.952
835	HET	83	NCI-H2405	JW-7-52-1	0.213	0.264	0.447
787	HET	126	SBC-3	PFK222-666 (RAD001)	0.0881	0.1687	0.4555
701	HET	14	NCI-H841	HKI-272	0.635	0.899	0.883
701	HET	41	NCI-H841	S-Trityl-L-cysteine	0.354	0.994	0.831
701	HET	59	NCI-H841	KIN001-123/WZ-1-84	1.175	1.208	1.146
701	HET	87	NCI-H841	KIN001-134	0.195	0.321	0.868
701	HET	5	NCI-H841	Sutent	0.991	0.923	1.001
701	HET	110	NCI-H841	Siliciclib/Roscovitine	0.7639	0.8999	0.8614
821	HET	126	NCI-H1793	PFK222-666 (RAD001)	0.3315	0.3573	0.4971
701	HET	60	NCI-H841	KIN001-124/NPK33-1-98-1 (BI-2356)	0.225	0.259	0.562
701	HET	100	NCI-H841	AZ83146	0.4829	0.9992	1.0342
701	HET	34	NCI-H841	KIN0001-014	1.003	1.03	1.003
701	HET	1	NCI-H841	Tarceva	0.962	0.879	0.917
701	HET	55	NCI-H841	KIN001-111/A770041	0.943	1.115	0.991
701	HET	29	NCI-H841	AZ628	0.85	0.92	1.052
701	HET	19	NCI-H841	Go 6976	0.913	1.017	1.17
701	HET	53	NCI-H841	KIN001-019/CGP60474	0.419	1.061	1.036
701	HET	57	NCI-H841	KIN001-113/WH-4-025	0.927	1.023	0.962
701	HET	54	NCI-H841	KIN001-021/CGP082996	1.098	1.182	1.109
701	HET	89	NCI-H841	Parthenolide	0.006	0.858	0.842
701	HET	96	NCI-H841	Pimozide	0.084	0.888	0.935
701	HET	106	NCI-H841	XMD8-85	0.8716	1.013	1.1167
701	HET	40	NCI-H841	TP-155	0.508	0.701	0.77
787	HET	73	SBC-3	MKC-1	0.066	0.08	0.912
787	HET	14	SBC-3	HKI-272	0.904	0.999	1.091
787	HET	19	SBC-3	Go 6976	0.898	0.723	0.971
787	HET	54	SBC-3	KIN001-021/CGP082996	0.666	1.032	1.019
787	HET	24	SBC-3	U-0126	0.786	0.826	0.855
787	HET	59	SBC-3	KIN001-123/WZ-1-84	1.074	1.09	1.002
787	HET	93	SBC-3	KIN001-138	0.233	0.839	1.054
787	HET	31	SBC-3	KIN0001-001	0.868	0.901	0.874
787	HET	55	SBC-3	KIN001-111/A770041	0.487	0.79	0.91
787	HET	38	SBC-3	KIN0001-045	0.964	0.885	0.964
787	HET	4	SBC-3	LY294002	0.27	1.044	1.079
787	HET	84	SBC-3	AZ960	0.011	0.277	1.103
787	HET	1	SBC-3	Tarceva	0.917	1.228	1.101
787	HET	33	SBC-3	KIN0001-012	0.97	0.941	1.009
787	HET	12	SBC-3	Cisplatin	1.034	1.226	0.965
787	HET	105	SBC-3	MLN4924	0.0567	0.5576	0.8547
787	HET	40	SBC-3	TP-155	0.261	1.003	0.978
787	HET	42	SBC-3	Y27632	1.019	0.929	0.971
787	HET	68	SBC-3	BAY-1942	0.673	0.948	0.886
787	HET	97	SBC-3	AZD6244	0.248	0.584	1.0715
787	HET	15	SBC-3	AG-957	1.016	1.155	0.978
787	HET	11	SBC-3	Taxol	0.152	0.182	0.954
787	HET	89	SBC-3	Parthenolide	0.002	1.081	1.191
787	HET	80	SBC-3	MRK 003	0.991	1.0601	1.155
787	HET	27	SBC-3	JAK Inhibitor I	0.934	0.975	0.855
787	HET	17	SBC-3	Cyclopamine	0.266	0.923	0.862
799	HET	83	NCI-H661	JW-7-52-1	0.155	0.201	0.547
787	HET	98	SBC-3	AZD1152	0.0691	0.1774	0.1926
787	HET	96	SBC-3	Pimozide	0.013	1.05	1.036
787	HET	71	SBC-3	Primethamine	0.163	1.138	1.099
787	HET	28	SBC-3	MLN8054	0.695	0.781	0.925
787	HET	57	SBC-3	KIN001-113/WH-4-025	0.065	0.097	0.723
787	HET	34	SBC-3	KIN0001-014	0.905	0.941	0.99
822	HET	83	NCI-H1869	JW-7-52-1	0.326	0.356	0.571
787	HET	9	SBC-3	MG-132	0.062	0.957	0.957
787	HET	111	SBC-3	Salubrinal	0.2906	1.0094	0.9521
787	HET	29	SBC-3	AZ628	0.903	0.913	0.959
787	HET	23	SBC-3	KN-93	0.412	0.733	0.802
787	HET	41	SBC-3	S-Trityl-L-cysteine	0.565	1.013	1.009
787	HET	66	SBC-3	HG-3-32-01	1.163	1.205	1.374
787	HET	22	SBC-3	LM-1685	1.102	0.785	0.828
787	HET	106	SBC-3	XMD8-85	0.2481	0.9927	0.9531
787	HET	30	SBC-3	Sorafenib	0.98	0.913	0.961
787	HET	63	SBC-3	KIN001-127	0.547	1.05	1.142
787	HET	5	SBC-3	Sutent	0.076	1.075	0.974
787	HET	109	SBC-3	Honokiol	-0.0064	0.8335	0.9077
787	HET	99	SBC-3	AZD6474/Zactema	0.0019	0.4828	0.9963
787	HET	87	SBC-3	KIN001-134	0.026	0.025	1.013
787	HET	32	SBC-3	KIN0001-006	0.603	0.828	0.924
787	HET	53	SBC-3	KIN001-019/CGP60474	0.023	0.047	0.906
787	HET	95	SBC-3	DM3189	0.779	0.928	1.058
787	HET	119	SBC-3	Lapatinib	0.3076	1.1084	1.0892
803	HET	83	NCI-H522	JW-7-52-1	0.191	0.252	0.575
787	HET	52	SBC-3	KIN001-013	1.016	1.057	0.945
787	HET	94	SBC-3	TXG 221	0.699	0.925	1.027
787	HET	61	SBC-3	KIN001-125/AMG702	0.889	0.854	0.905
787	HET	7	SBC-3	AG 1024	0.894	0.994	1.105
787	HET	20	SBC-3	Geldanamycin	0.076	0.289	0.817
846	HET	83	NCI-H2030	JW-7-52-1	0.17	0.278	0.59
787	HET	8	SBC-3	SU6656	0.94	0.665	1.228
787	HET	51	SBC-3	KIN001-005/BMS354825/Dasatinib	0.209	0.515	0.903
787	HET	104	SBC-3	Bortezomib/Velcade	-0.0061	0.8741	1.201
787	HET	10	SBC-3	L-685,458	1.064	1.136	0.876
787	HET	16	SBC-3	JAK2 Inhibitor II	1.012	0.985	0.99
787	HET	2	SBC-3	HCQ	0.968	1.101	1.088
787	HET	6	SBC-3	PHA665752	1	1.025	1.057
787	HET	62	SBC-3	KIN001-126	0.257	0.686	1.023
787	HET	36	SBC-3	KIN0001-022	0.738	0.821	0.898
787	HET	91	SBC-3	KIN-001-135	0.944	1.102	1.161
787	HET	18	SBC-3	P38 MAPK Inhibitor	0.951	0.939	0.893
787	HET	100	SBC-3	AZ83146	0.0078	0.301	0.8998
787	HET	60	SBC-3	KIN001-124/NPK33-1-98-1 (BI-2356)	0.107	0.061	0.918
787	HET	45	SBC-3	Z-L-L-Norleucine-CHO	0.178	1.014	0.959
787	HET	64	SBC-3	KIN001-128	0.219	1.197	1.114
860	HET	126	LCLC-103H	PFK222-666 (RAD001)	0.4704	0.6898	0.5989
787	HET	56	SBC-3	KIN001-112/WH-4-023	0.283	0.921	0.882
787	HET	37	SBC-3	KIN0001-023	0.875	0.884	0.977
787	HET	13	SBC-3	CL-387,785	0.255	1.173	0.999
787	HET	86	SBC-3	KIN001-139	0.002	0.022	1.12
787	HET	110	SBC-3	Siliciclib/Roscovitine	0.0645	0.8178	0.8379
787	HET	88	SBC-3	MS275	0.029	0.061	0.972
787	HET	35	SBC-3	KIN0001-017	0.6	0.913	0.968
787	HET	44	SBC-3	PD 98059	1.033	0.987	0.997
799	HET	51	NCI-H661	KIN001-005/BMS354825/Dasatinib	0.159	0.43	0.847
799	HET	6	NCI-H661	PHA665752	0.868	1.121	1.16
799	HET	57	NCI-H661	KIN001-113/WH-4-025	0.779	0.891	0.987
799	HET	67	NCI-H661	GST-MDA-7	0.044	0.44	1.007
799	HET	87	NCI-H661	KIN001-134	0.081	0.063	1.032
799	HET	56	NCI-H661	KIN001-112/WH-4-023	0.809	0.926	1.075
799	HET	73	NCI-H661	MKC-1	0.441	0.362	1.196
856	HET	126	HCC-366	PFK222-666 (RAD001)	0.3128	0.6016	0.607
799	HET	32	NCI-H661	KIN0001-006	0.685	0.852	0.962
799	HET	58	NCI-H661	KIN001-122/JW-2-8-1	0.87	0.931	0.812
799	HET	96	NCI-H661	Pimozide	0.171	0.846	1.069
799	HET	20	NCI-H661	Geldanamycin	0.262	0.636	0.811
799	HET	11	NCI-H661	Taxol	0.161	0.421	0.84
799	HET	16	NCI-H661	JAK2 Inhibitor II	0.832	0.825	0.812
799	HET	18	NCI-H661	P38 MAPK Inhibitor	0.742	0.971	1.003
863	HET	83	COR-L 23/CPR	JW-7-52-1	0.065	0.14	0.643
799	HET	17	NCI-H661	Cyclopamine	0.724	0.76	0.969
799	HET	100	NCI-H661	AZ83146	0.0408	0.369	1.0249
799	HET	37	NCI-H661	KIN0001-023	0.875	1.096	1.019
799	HET	62	NCI-H661	KIN001-126	0.823	0.901	1.22
799	HET	30	NCI-H661	Sorafenib	0.784	1.117	1.078
799	HET	86	NCI-H661	KIN001-139	0.026	0.847	1.107
799	HET	54	NCI-H661	KIN001-021/CGP082996	0.812	0.994	0.945
799	HET	13	NCI-H661	CL-387,785	0.278	0.498	0.75
799	HET	8	NCI-H661	SU6656	0.901	0.927	1.058
799	HET	68	NCI-H661	BAY-1942	0.876	0.966	1.156
799	HET	14	NCI-H661	HKI-272	0.303	0.371	0.626
799	HET	40	NCI-H661	TP-155	0.154	0.829	0.947
799	HET	94	NCI-H661	TXG 221	0.674	0.926	1.108
799	HET	55	NCI-H661	KIN001-111/A770041	0.94	1.04	1.002
799	HET	12	NCI-H661	Cisplatin	0.778	0.759	0.888
877	HET	83	PC-3 [JPC-3]	JW-7-52-1	0.231	0.272	0.653
799	HET	93	NCI-H661	KIN001-138	0.21	0.624	1.02
799	HET	91	NCI-H661	KIN-001-135	1.084	0.963	0.936
799	HET	19	NCI-H661	Go 6976	0.237	0.804	1.04
799	HET	9	NCI-H661	MG-132	0.107	0.871	0.742
799	HET	41	NCI-H661	S-Trityl-L-cysteine	0.378	0.694	0.961
799	HET	119	NCI-H661	Lapatinib	0.4907	0.5511	0.9134
799	HET	34	NCI-H661	KIN0001-014	1.162	1.102	1.23
799	HET	5	NCI-H661	Sutent	0.584	1.013	1.093
799	HET	10	NCI-H661	L-685,458	0.561	0.669	0.776
799	HET	1	NCI-H661	Tarceva	0.66	1.005	1.128
799	HET	44	NCI-H661	PD 98059	1.003	0.976	1.007
799	HET	89	NCI-H661	Parthenolide	0.035	1.06	1.359
1180	HET	126	NCI-H3122	PFK222-666 (RAD001)	0.4368	0.5901	0.6606
799	HET	84	NCI-H661	AZ960	0.159	0.401	1.082
799	HET	105	NCI-H661	MLN4924	0.7296	0.7529	1.045
799	HET	38	NCI-H661	KIN0001-045	1.004	0.989	1.022
799	HET	24	NCI-H661	U-0126	0.445	0.939	0.939
799	HET	29	NCI-H661	AZ628	0.99	1.084	0.984
799	HET	33	NCI-H661	KIN0001-012	0.993	1.038	1.135
799	HET	28	NCI-H661	MLN8054	0.888	1.076	1.04
799	HET	35	NCI-H661	KIN0001-017	0.807	1.102	1.216
799	HET	61	NCI-H661	KIN001-125/AMG702	0.947	0.898	1.115
799	HET	106	NCI-H661	XMD8-85	0.6932	0.7966	0.8344
799	HET	60	NCI-H661	KIN001-124/NPK33-1-98-1 (BI-2356)	0.054	0.13	1.158
799	HET	7	NCI-H661	AG 1024	0.995	0.874	1.04
799	HET	71	NCI-H661	Primethamine	0.334	0.798	1.177
799	HET	95	NCI-H661	DM3189	0.308	1.011	1.069
799	HET	36	NCI-H661	KIN0001-022	1.043	1.136	1.134
799	HET	31	NCI-H661	KIN0001-001	0.94	1.161	1.114
799	HET	88	NCI-H661	MS275	NA	0.578	1.2
799	HET	45	NCI-H661	Z-L-L-Norleucine-CHO	0.12	0.916	0.921
799	HET	97	NCI-H661	AZD6244	0.2686	0.6533	0.6185
886	HET	83	EBC-1	JW-7-52-1	0.14	0.207	0.669
799	HET	59	NCI-H661	KIN001-123/WZ-1-84	0.966	0.932	1.083
799	HET	66	NCI-H661	HG-3-32-01	0.875	0.867	0.947
799	HET	64	NCI-H661	KIN001-128	0.603	0.886	1.11
799	HET	23	NCI-H661	KN-93	0.222	0.763	1.039
799	HET	98	NCI-H661	AZD1152	0.3425	0.5958	0.5367
799	HET	99	NCI-H661	AZD6474/Zactema	0.0182	0.2766	0.7481
799	HET	111	NCI-H661	Salubrinal	0.4564	1.1266	1.3098
799	HET	52	NCI-H661	KIN001-013	0.927	1.068	1.204
799	HET	109	NCI-H661	Honokiol	0.0138	0.6084	1.0062
799	HET	63	NCI-H661	KIN001-127	0.869	0.928	1.212
799	HET	15	NCI-H661	AG-957	0.702	0.877	0.89
799	HET	80	NCI-H661	MRK 003	0.6088	1.222	1.2391
799	HET	53	NCI-H661	KIN001-019/CGP60474	0.035	0.914	1.095
799	HET	27	NCI-H661	JAK Inhibitor I	0.885	1.062	1.017
799	HET	104	NCI-H661	Bortezomib/Velcade	0.0539	0.9373	1.0228
799	HET	42	NCI-H661	Y27632	1.13	1.072	1.099
799	HET	110	NCI-H661	Siliciclib/Roscovitine	0.5995	0.9303	0.957
799	HET	2	NCI-H661	HCQ	0.839	1.182	1.208
799	HET	4	NCI-H661	LY294002	0.481	0.901	1.042
799	HET	22	NCI-H661	LM-1685	0.883	1.085	0.952
803	HET	20	NCI-H522	Geldanamycin	0.38	0.748	0.968
803	HET	106	NCI-H522	XMD8-85	0.4579	1.0278	1.134
803	HET	5	NCI-H522	Sutent	0.557	0.849	0.963
803	HET	91	NCI-H522	KIN-001-135	0.759	0.966	0.91
803	HET	56	NCI-H522	KIN001-112/WH-4-023	0.77	0.875	0.898
803	HET	6	NCI-H522	PHA665752	0.928	0.892	0.998
803	HET	30	NCI-H522	Sorafenib	1.104	1.076	1.107
803	HET	53	NCI-H522	KIN001-019/CGP60474	0.133	0.882	0.955
803	HET	95	NCI-H522	DM3189	0.14	0.933	1.053
886	HET	126	EBC-1	PFK222-666 (RAD001)	0.426	0.5106	0.6731
803	HET	60	NCI-H522	KIN001-124/NPK33-1-98-1 (BI-2356)	0.098	0.272	1.016
803	HET	51	NCI-H522	KIN001-005/BMS354825/Dasatinib	0.518	0.706	0.684
803	HET	99	NCI-H522	AZD6474/Zactema	0.0069	0.5757	0.891
803	HET	58	NCI-H522	KIN001-122/JW-2-8-1	0.868	0.908	0.858
824	HET	83	NCI-H1944	JW-7-52-1	0.224	0.381	0.674
803	HET	68	NCI-H522	BAY-1942	0.92	1.049	1.071
803	HET	38	NCI-H522	KIN0001-045	0.598	0.749	0.672
803	HET	14	NCI-H522	HKI-272	0.513	0.588	0.765
803	HET	61	NCI-H522	KIN001-125/AMG702	0.944	1.073	1.067
803	HET	54	NCI-H522	KIN001-021/CGP082996	0.767	0.958	0.904
803	HET	64	NCI-H522	KIN001-128	0.748	0.967	1.081
803	HET	96	NCI-H522	Pimozide	0.171	0.895	1.017
803	HET	98	NCI-H522	AZD1152	0.2671	0.6832	0.7022
803	HET	11	NCI-H522	Taxol	0.447	0.484	0.947
803	HET	100	NCI-H522	AZ83146	0.0546	0.5482	1.0586
803	HET	55	NCI-H522	KIN001-111/A770041	0.81	0.928	0.906
803	HET	1	NCI-H522	Tarceva	0.571	0.673	0.754
1206	HET	83	H2722	JW-7-52-1	0.396	0.419	0.684
803	HET	9	NCI-H522	MG-132	0.236	1.178	1.108
803	HET	87	NCI-H522	KIN001-134	0.096	0.154	1.153
803	HET	63	NCI-H522	KIN001-127	0.832	0.979	1.049
803	HET	86	NCI-H522	KIN001-139	0.132	0.925	1.089
803	HET	88	NCI-H522	MS275	NA	0.571	1.173
803	HET	62	NCI-H522	KIN001-126	0.805	0.989	1.111
803	HET	80	NCI-H522	MRK 003	1.0582	1.3729	1.338
803	HET	17	NCI-H522	Cyclopamine	0.823	0.804	0.887
803	HET	67	NCI-H522	GST-MDA-7	0.026	0.78	1.013
803	HET	71	NCI-H522	Primethamine	0.474	0.948	1.084
803	HET	94	NCI-H522	TXG 221	0.736	0.924	0.96
821	HET	92	NCI-H1793	PP 242	0.144	0.361	0.699
803	HET	105	NCI-H522	MLN4924	0.3215	0.5445	1.0713
803	HET	40	NCI-H522	TP-155	0.138	0.765	0.666
803	HET	66	NCI-H522	HG-3-32-01	0.94	0.899	0.898
803	HET	57	NCI-H522	KIN001-113/WH-4-025	0.997	0.963	0.946
803	HET	45	NCI-H522	Z-L-L-Norleucine-CHO	0.058	1.253	1.241
803	HET	111	NCI-H522	Salubrinal	0.3122	0.9358	1.1159
803	HET	93	NCI-H522	KIN001-138	0.544	0.751	0.973
803	HET	73	NCI-H522	MKC-1	0.298	0.688	1.037
803	HET	109	NCI-H522	Honokiol	-0.0013	0.9354	1.3297
803	HET	29	NCI-H522	AZ628	0.701	0.793	0.884
1247	HET	83	NCI-H2291	JW-7-52-1	0.469	0.482	0.704
803	HET	97	NCI-H522	AZD6244	0.5401	0.6467	0.8627
803	HET	84	NCI-H522	AZ960	0.306	0.669	0.965
803	HET	36	NCI-H522	KIN0001-022	1.141	1.257	1.188
803	HET	110	NCI-H522	Siliciclib/Roscovitine	0.6262	0.9669	1.1557
803	HET	104	NCI-H522	Bortezomib/Velcade	0.0328	1.0672	1.3042
803	HET	35	NCI-H522	KIN0001-017	0.567	0.921	1.075
803	HET	89	NCI-H522	Parthenolide	0.009	0.972	1.2
803	HET	19	NCI-H522	Go 6976	0.805	0.844	0.907
803	HET	32	NCI-H522	KIN0001-006	0.616	0.672	0.917
803	HET	41	NCI-H522	S-Trityl-L-cysteine	0.405	1.031	1.15
803	HET	52	NCI-H522	KIN001-013	0.934	0.961	0.928
803	HET	34	NCI-H522	KIN0001-014	0.916	0.877	1.064
803	HET	37	NCI-H522	KIN0001-023	0.993	1.352	1.223
803	HET	119	NCI-H522	Lapatinib	0.2013	0.5704	1.0054
803	HET	59	NCI-H522	KIN001-123/WZ-1-84	0.755	0.889	0.936
820	HET	45	NCI-H1755	Z-L-L-Norleucine-CHO	0.286	1.035	1.168
820	HET	104	NCI-H1755	Bortezomib/Velcade	0.018	1.0024	1.046
820	HET	35	NCI-H1755	KIN0001-017	0.542	0.906	1.034
820	HET	87	NCI-H1755	KIN001-134	0.222	0.352	0.949
820	HET	61	NCI-H1755	KIN001-125/AMG702	0.963	1.059	1.108
820	HET	37	NCI-H1755	KIN0001-023	0.62	0.913	1.104
820	HET	44	NCI-H1755	PD 98059	0.971	1.099	1.155
820	HET	97	NCI-H1755	AZD6244	0.417	0.6627	0.7692
820	HET	12	NCI-H1755	Cisplatin	0.898	0.998	1.027
820	HET	100	NCI-H1755	AZ83146	0.1258	0.8379	1.0701
820	HET	28	NCI-H1755	MLN8054	0.805	0.914	0.943
820	HET	63	NCI-H1755	KIN001-127	0.803	0.978	1.048
820	HET	51	NCI-H1755	KIN001-005/BMS354825/Dasatinib	0.181	0.501	0.92
820	HET	52	NCI-H1755	KIN001-013	1.181	1.035	1.101
820	HET	53	NCI-H1755	KIN001-019/CGP60474	0.114	0.641	1.05
820	HET	86	NCI-H1755	KIN001-139	-0.004	0.374	1.071
820	HET	94	NCI-H1755	TXG 221	0.539	0.809	0.995
820	HET	73	NCI-H1755	MKC-1	0.461	0.857	1.212
820	HET	24	NCI-H1755	U-0126	0.775	0.906	0.939
820	HET	66	NCI-H1755	HG-3-32-01	0.779	0.924	0.913
820	HET	80	NCI-H1755	MRK 003	0.8772	0.9662	1.0733
820	HET	105	NCI-H1755	MLN4924	0.4866	1.1822	1.0626
820	HET	93	NCI-H1755	KIN001-138	0.451	0.782	1.121
820	HET	71	NCI-H1755	Primethamine	0.626	0.915	1.146
820	HET	67	NCI-H1755	GST-MDA-7	0.041	0.858	1.022
820	HET	98	NCI-H1755	AZD1152	0.6871	0.7008	0.6108
820	HET	57	NCI-H1755	KIN001-113/WH-4-025	0.582	0.713	1.132
820	HET	23	NCI-H1755	KN-93	0.411	0.948	1.053
820	HET	6	NCI-H1755	PHA665752	0.965	1.026	1.033
820	HET	32	NCI-H1755	KIN0001-006	0.779	0.76	0.862
820	HET	111	NCI-H1755	Salubrinal	0.4171	1.0538	1.2015
787	HET	125	SBC-3	BEZ235	0.0277	0.4618	0.7056
820	HET	5	NCI-H1755	Sutent	0.489	0.957	0.959
820	HET	17	NCI-H1755	Cyclopamine	0.951	0.972	0.913
820	HET	13	NCI-H1755	CL-387,785	0.532	0.782	0.971
820	HET	11	NCI-H1755	Taxol	0.413	0.633	0.771
820	HET	110	NCI-H1755	Siliciclib/Roscovitine	0.5933	0.9427	0.9382
820	HET	91	NCI-H1755	KIN-001-135	1.014	1.061	1.016
820	HET	40	NCI-H1755	TP-155	0.167	0.42	0.916
820	HET	2	NCI-H1755	HCQ	0.749	0.873	0.864
701	HET	83	NCI-H841	JW-7-52-1	0.173	0.277	0.711
820	HET	64	NCI-H1755	KIN001-128	0.602	0.961	0.989
820	HET	31	NCI-H1755	KIN0001-001	0.512	0.939	0.857
820	HET	119	NCI-H1755	Lapatinib	0.2005	1.1032	1.0719
820	HET	84	NCI-H1755	AZ960	0.181	0.835	1
820	HET	8	NCI-H1755	SU6656	0.955	0.9	1.013
820	HET	33	NCI-H1755	KIN0001-012	0.89	1.1	1.175
820	HET	34	NCI-H1755	KIN0001-014	0.95	1.182	1.167
820	HET	14	NCI-H1755	HKI-272	0.665	0.891	1.065
820	HET	59	NCI-H1755	KIN001-123/WZ-1-84	1.13	1.16	1.27
820	HET	62	NCI-H1755	KIN001-126	0.309	0.827	0.958
820	HET	68	NCI-H1755	BAY-1942	0.922	1.025	1.208
820	HET	60	NCI-H1755	KIN001-124/NPK33-1-98-1 (BI-2356)	0.341	0.343	1.05
820	HET	19	NCI-H1755	Go 6976	0.657	0.738	0.836
820	HET	95	NCI-H1755	DM3189	0.088	0.908	0.926
820	HET	36	NCI-H1755	KIN0001-022	0.832	0.914	0.954
820	HET	9	NCI-H1755	MG-132	0.405	0.942	0.885
820	HET	83	NCI-H1755	JW-7-52-1	0.187	0.276	0.737
820	HET	96	NCI-H1755	Pimozide	0.255	0.832	0.989
820	HET	4	NCI-H1755	LY294002	0.462	0.858	0.966
820	HET	58	NCI-H1755	KIN001-122/JW-2-8-1	1.003	1.143	0.888
820	HET	16	NCI-H1755	JAK2 Inhibitor II	0.893	0.972	0.988
846	HET	126	NCI-H2030	PFK222-666 (RAD001)	0.3964	0.4973	0.7442
820	HET	99	NCI-H1755	AZD6474/Zactema	0.0294	0.6735	0.9244
820	HET	29	NCI-H1755	AZ628	0.857	0.926	1.073
1210	HET	83	H2803	JW-7-52-1	0.055	0.145	0.747
820	HET	88	NCI-H1755	MS275	0.025	0.497	0.858
820	HET	42	NCI-H1755	Y27632	0.986	1.09	1.133
820	HET	54	NCI-H1755	KIN001-021/CGP082996	0.903	1.072	1.056
820	HET	20	NCI-H1755	Geldanamycin	0.26	0.606	0.882
820	HET	55	NCI-H1755	KIN001-111/A770041	0.379	1.103	1.093
820	HET	56	NCI-H1755	KIN001-112/WH-4-023	0.857	1.149	1.088
820	HET	15	NCI-H1755	AG-957	1.051	1.05	1.102
820	HET	38	NCI-H1755	KIN0001-045	0.779	0.814	0.926
820	HET	18	NCI-H1755	P38 MAPK Inhibitor	0.802	1.008	0.917
820	HET	106	NCI-H1755	XMD8-85	0.8149	0.9637	0.9752
820	HET	22	NCI-H1755	LM-1685	1	1.072	1.03
820	HET	30	NCI-H1755	Sorafenib	0.765	0.859	0.907
820	HET	27	NCI-H1755	JAK Inhibitor I	0.888	0.87	1.023
820	HET	10	NCI-H1755	L-685,458	0.908	0.925	0.899
820	HET	41	NCI-H1755	S-Trityl-L-cysteine	0.603	1.008	1.169
820	HET	7	NCI-H1755	AG 1024	1.105	1.062	1.11
820	HET	43	NCI-H1755	Go 6983	0.921	0.977	1.044
820	HET	89	NCI-H1755	Parthenolide	0.39	0.923	1.089
820	HET	109	NCI-H1755	Honokiol	-0.0031	0.7768	0.9743
820	HET	1	NCI-H1755	Tarceva	0.843	0.911	0.948
821	HET	119	NCI-H1793	Lapatinib	0.607	0.6333	0.8551
821	HET	57	NCI-H1793	KIN001-113/WH-4-025	0.481	0.598	0.827
821	HET	106	NCI-H1793	XMD8-85	0.8958	0.9272	1.0793
821	HET	32	NCI-H1793	KIN0001-006	0.759	0.816	1.01
821	HET	8	NCI-H1793	SU6656	0.799	0.898	0.973
821	HET	15	NCI-H1793	AG-957	0.852	0.95	0.858
821	HET	40	NCI-H1793	TP-155	0.1	0.705	0.872
821	HET	86	NCI-H1793	KIN001-139	0.276	0.928	0.995
821	HET	94	NCI-H1793	TXG 221	0.605	0.79	0.84
821	HET	111	NCI-H1793	Salubrinal	0.5598	0.9781	1.2563
701	HET	126	NCI-H841	PFK222-666 (RAD001)	0.3897	0.4726	0.7565
821	HET	2	NCI-H1793	HCQ	0.923	0.951	1.201
821	HET	63	NCI-H1793	KIN001-127	0.838	0.827	0.981
821	HET	91	NCI-H1793	KIN-001-135	0.967	1.014	0.996
821	HET	27	NCI-H1793	JAK Inhibitor I	0.645	0.943	1.076
821	HET	51	NCI-H1793	KIN001-005/BMS354825/Dasatinib	0.263	0.51	0.753
821	HET	84	NCI-H1793	AZ960	0.476	1.001	0.925
821	HET	60	NCI-H1793	KIN001-124/NPK33-1-98-1 (BI-2356)	0.422	0.45	0.932
787	HET	83	SBC-3	JW-7-52-1	0.028	0.041	0.785
821	HET	13	NCI-H1793	CL-387,785	0.337	0.622	0.881
821	HET	97	NCI-H1793	AZD6244	0.5062	0.6674	0.7786
821	HET	109	NCI-H1793	Honokiol	0.0166	0.7321	0.9787
821	HET	96	NCI-H1793	Pimozide	0.029	0.801	0.772
821	HET	9	NCI-H1793	MG-132	0.454	0.949	1.085
821	HET	52	NCI-H1793	KIN001-013	0.849	0.873	0.971
821	HET	5	NCI-H1793	Sutent	0.524	0.812	1.048
821	HET	23	NCI-H1793	KN-93	0.402	0.834	0.902
821	HET	61	NCI-H1793	KIN001-125/AMG702	0.802	0.794	0.917
877	HET	126	PC-3 [JPC-3]	PFK222-666 (RAD001)	0.5639	0.6482	0.7862
821	HET	7	NCI-H1793	AG 1024	0.841	0.843	0.854
821	HET	11	NCI-H1793	Taxol	0.37	0.502	0.941
821	HET	14	NCI-H1793	HKI-272	0.447	0.582	0.866
821	HET	19	NCI-H1793	Go 6976	0.662	0.555	0.775
821	HET	105	NCI-H1793	MLN4924	0.9885	1.0429	1.0583
821	HET	16	NCI-H1793	JAK2 Inhibitor II	0.792	0.845	0.965
821	HET	44	NCI-H1793	PD 98059	0.886	1.062	1.081
821	HET	93	NCI-H1793	KIN001-138	0.828	1.014	1.025
821	HET	31	NCI-H1793	KIN0001-001	0.377	1.025	1.128
821	HET	73	NCI-H1793	MKC-1	0.235	0.359	0.64
821	HET	99	NCI-H1793	AZD6474/Zactema	0.1427	0.7873	0.9255
821	HET	110	NCI-H1793	Siliciclib/Roscovitine	0.6274	0.9259	0.8932
821	HET	12	NCI-H1793	Cisplatin	0.955	0.9	0.975
821	HET	45	NCI-H1793	Z-L-L-Norleucine-CHO	0.402	1.015	1.06
821	HET	4	NCI-H1793	LY294002	0.365	0.706	1.041
821	HET	33	NCI-H1793	KIN0001-012	0.798	0.95	0.984
821	HET	54	NCI-H1793	KIN001-021/CGP082996	0.84	0.97	0.98
821	HET	64	NCI-H1793	KIN001-128	0.745	0.766	0.905
821	HET	104	NCI-H1793	Bortezomib/Velcade	0.4325	1.0215	1.029
821	HET	10	NCI-H1793	L-685,458	0.96	0.976	1.012
821	HET	62	NCI-H1793	KIN001-126	0.564	0.865	1.022
1204	HET	83	H2596	JW-7-52-1	0.343	0.385	0.791
821	HET	56	NCI-H1793	KIN001-112/WH-4-023	0.727	0.902	0.922
821	HET	68	NCI-H1793	BAY-1942	0.839	0.955	0.781
821	HET	24	NCI-H1793	U-0126	0.631	0.783	0.85
821	HET	88	NCI-H1793	MS275	NA	0.69	0.77
821	HET	17	NCI-H1793	Cyclopamine	0.864	0.876	0.962
821	HET	41	NCI-H1793	S-Trityl-L-cysteine	0.416	0.956	0.981
821	HET	36	NCI-H1793	KIN0001-022	0.574	0.734	0.995
821	HET	29	NCI-H1793	AZ628	0.683	0.901	1.034
835	HET	92	NCI-H2405	PP 242	0.21	0.502	0.795
821	HET	35	NCI-H1793	KIN0001-017	0.489	0.961	0.972
821	HET	20	NCI-H1793	Geldanamycin	0.43	0.362	0.882
821	HET	28	NCI-H1793	MLN8054	0.711	0.936	1.027
821	HET	59	NCI-H1793	KIN001-123/WZ-1-84	0.897	0.749	0.884
821	HET	71	NCI-H1793	Primethamine	0.905	0.69	0.609
821	HET	95	NCI-H1793	DM3189	0.856	1.027	0.988
821	HET	80	NCI-H1793	MRK 003	0.9216	0.9663	1.0055
821	HET	6	NCI-H1793	PHA665752	0.875	0.895	NA
821	HET	43	NCI-H1793	Go 6983	1.222	1.089	1.006
821	HET	34	NCI-H1793	KIN0001-014	1.082	1.071	0.991
821	HET	100	NCI-H1793	AZ83146	0.6509	0.9728	1.0861
821	HET	30	NCI-H1793	Sorafenib	0.948	1.153	1.165
821	HET	22	NCI-H1793	LM-1685	0.852	0.886	1.015
821	HET	1	NCI-H1793	Tarceva	0.651	0.892	1.055
821	HET	37	NCI-H1793	KIN0001-023	0.81	1.019	1.095
821	HET	18	NCI-H1793	P38 MAPK Inhibitor	0.828	0.828	0.982
821	HET	53	NCI-H1793	KIN001-019/CGP60474	0.208	0.759	0.977
821	HET	98	NCI-H1793	AZD1152	0.8285	0.7806	0.7632
821	HET	66	NCI-H1793	HG-3-32-01	0.974	0.713	0.904
821	HET	87	NCI-H1793	KIN001-134	0.38	0.426	0.898
821	HET	42	NCI-H1793	Y27632	0.935	1.044	1.018
821	HET	38	NCI-H1793	KIN0001-045	0.633	0.84	0.987
821	HET	55	NCI-H1793	KIN001-111/A770041	0.594	0.734	0.874
821	HET	89	NCI-H1793	Parthenolide	0.303	0.682	0.668
822	HET	127	NCI-H1869	KIN001-155	0.017	0.91	1.118
822	HET	119	NCI-H1869	Lapatinib	0.4958	0.6593	0.8853
820	HET	126	NCI-H1755	PFK222-666 (RAD001)	0.5599	0.5937	0.796
822	HET	36	NCI-H1869	KIN0001-022	0.932	0.996	1.1
822	HET	51	NCI-H1869	KIN001-005/BMS354825/Dasatinib	0.255	0.751	1.016
822	HET	43	NCI-H1869	Go 6983	0.975	0.964	1.036
822	HET	32	NCI-H1869	KIN0001-006	0.92	0.85	1.069
822	HET	9	NCI-H1869	MG-132	0.398	1.113	1.106
822	HET	106	NCI-H1869	XMD8-85	1.0148	1.1313	1.1909
822	HET	17	NCI-H1869	Cyclopamine	1.057	1.061	1.112
822	HET	20	NCI-H1869	Geldanamycin	0.502	0.855	0.966
822	HET	6	NCI-H1869	PHA665752	0.938	0.893	0.994
822	HET	13	NCI-H1869	CL-387,785	0.55	0.858	0.892
822	HET	61	NCI-H1869	KIN001-125/AMG702	1.011	1.345	1.172
822	HET	14	NCI-H1869	HKI-272	0.457	0.692	1.08
824	HET	92	NCI-H1944	PP 242	0.118	0.485	0.805
822	HET	52	NCI-H1869	KIN001-013	1.325	1.119	1.072
822	HET	16	NCI-H1869	JAK2 Inhibitor II	1.006	1.004	0.974
822	HET	66	NCI-H1869	HG-3-32-01	1.178	1.183	1.216
822	HET	64	NCI-H1869	KIN001-128	1.024	0.931	1.235
835	HET	126	NCI-H2405	PFK222-666 (RAD001)	0.6318	0.7472	0.8071
822	HET	57	NCI-H1869	KIN001-113/WH-4-025	0.8	0.901	1.108
822	HET	88	NCI-H1869	MS275	NA	0.571	0.855
822	HET	12	NCI-H1869	Cisplatin	0.83	1.004	1.156
822	HET	62	NCI-H1869	KIN001-126	0.789	1.028	1.236
822	HET	45	NCI-H1869	Z-L-L-Norleucine-CHO	0.199	0.605	0.861
856	HET	92	HCC-366	PP 242	0.045	0.253	0.809
822	HET	60	NCI-H1869	KIN001-124/NPK33-1-98-1 (BI-2356)	0.564	0.925	1.359
822	HET	31	NCI-H1869	KIN0001-001	0.774	1.235	1.305
822	HET	4	NCI-H1869	LY294002	0.831	0.882	0.942
822	HET	5	NCI-H1869	Sutent	0.778	0.892	0.92
822	HET	30	NCI-H1869	Sorafenib	0.793	0.908	1.095
822	HET	29	NCI-H1869	AZ628	1.122	1.051	1.117
822	HET	28	NCI-H1869	MLN8054	0.876	1.075	1.166
822	HET	54	NCI-H1869	KIN001-021/CGP082996	1.046	1.208	1.135
822	HET	105	NCI-H1869	MLN4924	1.1017	1.2519	1.232
822	HET	53	NCI-H1869	KIN001-019/CGP60474	0.078	0.881	1.073
822	HET	10	NCI-H1869	L-685,458	0.881	1.044	1.069
822	HET	38	NCI-H1869	KIN0001-045	0.799	0.905	1.042
822	HET	96	NCI-H1869	Pimozide	0.544	0.994	1.059
822	HET	109	NCI-H1869	Honokiol	0.0573	0.8172	1.105
822	HET	95	NCI-H1869	DM3189	0.761	1.05	1.082
822	HET	42	NCI-H1869	Y27632	1.151	1.005	1.108
822	HET	11	NCI-H1869	Taxol	0.677	0.802	1.059
822	HET	111	NCI-H1869	Salubrinal	0.2243	1.0872	1.1588
822	HET	1	NCI-H1869	Tarceva	0.81	0.901	1.018
822	HET	91	NCI-H1869	KIN-001-135	0.949	1.058	1.083
822	HET	97	NCI-H1869	AZD6244	0.3633	0.4311	0.4946
822	HET	2	NCI-H1869	HCQ	1.001	0.943	0.886
822	HET	100	NCI-H1869	AZ83146	0.5752	0.9349	0.9574
822	HET	84	NCI-H1869	AZ960	0.378	0.849	0.82
822	HET	89	NCI-H1869	Parthenolide	0.593	0.957	0.88
822	HET	44	NCI-H1869	PD 98059	0.831	0.97	0.985
822	HET	68	NCI-H1869	BAY-1942	0.386	1.098	1.011
822	HET	40	NCI-H1869	TP-155	0.081	0.624	0.843
822	HET	18	NCI-H1869	P38 MAPK Inhibitor	0.928	1.121	1.026
822	HET	23	NCI-H1869	KN-93	0.587	0.833	1.004
822	HET	56	NCI-H1869	KIN001-112/WH-4-023	1.114	1.125	1.057
822	HET	104	NCI-H1869	Bortezomib/Velcade	0.0869	0.4705	1.2638
822	HET	15	NCI-H1869	AG-957	0.764	0.968	0.958
822	HET	80	NCI-H1869	MRK 003	0.7082	0.8635	0.7814
822	HET	55	NCI-H1869	KIN001-111/A770041	0.489	0.934	1.319
822	HET	87	NCI-H1869	KIN001-134	0.452	0.472	0.818
822	HET	33	NCI-H1869	KIN0001-012	1.023	1.004	0.871
822	HET	71	NCI-H1869	Primethamine	0.94	1.028	1.103
822	HET	22	NCI-H1869	LM-1685	0.927	0.887	0.946
822	HET	35	NCI-H1869	KIN0001-017	0.582	0.744	0.932
822	HET	86	NCI-H1869	KIN001-139	0.003	0.669	0.829
822	HET	8	NCI-H1869	SU6656	0.819	0.841	0.898
822	HET	99	NCI-H1869	AZD6474/Zactema	0.1976	0.4011	0.6492
822	HET	37	NCI-H1869	KIN0001-023	0.876	0.927	1.048
822	HET	59	NCI-H1869	KIN001-123/WZ-1-84	1.132	1.111	1.053
701	HET	65	NCI-H841	KIN001-130	0.38	0.726	0.809
822	HET	94	NCI-H1869	TXG 221	0.567	0.786	0.996
822	HET	19	NCI-H1869	Go 6976	0.77	0.804	0.993
822	HET	98	NCI-H1869	AZD1152	0.7509	0.8902	0.8278
822	HET	7	NCI-H1869	AG 1024	0.942	1.058	0.937
822	HET	24	NCI-H1869	U-0126	0.648	0.894	0.921
822	HET	27	NCI-H1869	JAK Inhibitor I	0.892	1.007	1.12
822	HET	110	NCI-H1869	Siliciclib/Roscovitine	0.6876	1.0503	1.1163
822	HET	63	NCI-H1869	KIN001-127	1.143	1.07	1.369
822	HET	34	NCI-H1869	KIN0001-014	1.142	0.917	0.981
822	HET	41	NCI-H1869	S-Trityl-L-cysteine	0.676	1.16	1.041
822	HET	73	NCI-H1869	MKC-1	0.467	0.78	1.219
824	HET	36	NCI-H1944	KIN0001-022	1.052	0.945	0.789
824	HET	9	NCI-H1944	MG-132	0.596	0.867	0.793
824	HET	104	NCI-H1944	Bortezomib/Velcade	0.5841	0.9784	1.0644
824	HET	95	NCI-H1944	DM3189	0.702	0.955	0.862
824	HET	33	NCI-H1944	KIN0001-012	1.003	1.099	1.009
824	HET	37	NCI-H1944	KIN0001-023	0.681	0.907	0.848
824	HET	73	NCI-H1944	MKC-1	0.256	0.595	0.898
824	HET	10	NCI-H1944	L-685,458	0.877	1.024	0.914
824	HET	43	NCI-H1944	Go 6983	0.892	1.014	1.028
824	HET	105	NCI-H1944	MLN4924	0.7425	1.0616	1.109
824	HET	5	NCI-H1944	Sutent	0.595	0.936	0.961
824	HET	106	NCI-H1944	XMD8-85	0.6538	1.0587	0.9062
824	HET	19	NCI-H1944	Go 6976	0.593	0.604	0.774
1210	HET	92	H2803	PP 242	0.254	0.524	0.821
824	HET	18	NCI-H1944	P38 MAPK Inhibitor	0.415	0.657	0.855
824	HET	42	NCI-H1944	Y27632	1.048	1.013	1.06
824	HET	63	NCI-H1944	KIN001-127	0.968	1.215	0.98
824	HET	14	NCI-H1944	HKI-272	0.631	0.645	0.794
824	HET	61	NCI-H1944	KIN001-125/AMG702	1.139	1.12	1.046
824	HET	64	NCI-H1944	KIN001-128	1.017	1.246	0.986
824	HET	11	NCI-H1944	Taxol	0.422	0.693	0.97
824	HET	24	NCI-H1944	U-0126	0.697	0.804	0.813
824	HET	54	NCI-H1944	KIN001-021/CGP082996	0.925	1.124	1.072
824	HET	1	NCI-H1944	Tarceva	0.709	0.672	0.773
824	HET	8	NCI-H1944	SU6656	0.887	0.931	0.9
824	HET	55	NCI-H1944	KIN001-111/A770041	0.524	1	1.025
824	HET	44	NCI-H1944	PD 98059	1.002	0.958	1.13
824	HET	16	NCI-H1944	JAK2 Inhibitor II	0.931	0.941	0.887
824	HET	17	NCI-H1944	Cyclopamine	0.567	0.881	0.845
824	HET	40	NCI-H1944	TP-155	0.225	0.956	0.845
824	HET	98	NCI-H1944	AZD1152	0.7572	0.9055	0.7935
824	HET	94	NCI-H1944	TXG 221	0.772	0.996	0.799
824	HET	12	NCI-H1944	Cisplatin	0.856	0.899	1.003
824	HET	84	NCI-H1944	AZ960	0.501	0.82	0.922
824	HET	34	NCI-H1944	KIN0001-014	1.026	1.055	0.973
824	HET	22	NCI-H1944	LM-1685	0.906	0.804	1.041
824	HET	99	NCI-H1944	AZD6474/Zactema	0.073	0.7109	0.8491
824	HET	89	NCI-H1944	Parthenolide	0.842	0.826	0.797
824	HET	66	NCI-H1944	HG-3-32-01	1.058	0.928	0.767
824	HET	31	NCI-H1944	KIN0001-001	0.755	1.111	1.056
1204	HET	92	H2596	PP 242	0.309	0.47	0.832
824	HET	41	NCI-H1944	S-Trityl-L-cysteine	0.521	0.961	0.806
824	HET	62	NCI-H1944	KIN001-126	0.505	0.94	1.014
824	HET	38	NCI-H1944	KIN0001-045	0.777	0.747	0.955
824	HET	68	NCI-H1944	BAY-1942	0.683	1.018	0.854
824	HET	52	NCI-H1944	KIN001-013	1.001	1.024	0.918
824	HET	88	NCI-H1944	MS275	NA	0.323	0.717
824	HET	27	NCI-H1944	JAK Inhibitor I	0.887	1.001	0.866
824	HET	2	NCI-H1944	HCQ	0.788	0.978	0.894
824	HET	13	NCI-H1944	CL-387,785	0.418	0.685	0.847
824	HET	93	NCI-H1944	KIN001-138	0.682	0.952	0.889
824	HET	28	NCI-H1944	MLN8054	0.914	0.904	0.846
824	HET	100	NCI-H1944	AZ83146	0.1014	0.7802	0.9896
824	HET	45	NCI-H1944	Z-L-L-Norleucine-CHO	0.95	1.07	0.996
824	HET	71	NCI-H1944	Primethamine	0.241	1.136	1.016
824	HET	110	NCI-H1944	Siliciclib/Roscovitine	0.6921	0.9011	0.9986
824	HET	59	NCI-H1944	KIN001-123/WZ-1-84	0.809	0.816	0.818
824	HET	29	NCI-H1944	AZ628	0.891	1.005	0.856
824	HET	4	NCI-H1944	LY294002	0.556	0.828	0.965
824	HET	15	NCI-H1944	AG-957	0.925	0.965	0.901
824	HET	51	NCI-H1944	KIN001-005/BMS354825/Dasatinib	0.22	0.522	0.806
824	HET	35	NCI-H1944	KIN0001-017	0.751	1.011	0.904
824	HET	57	NCI-H1944	KIN001-113/WH-4-025	0.786	0.998	1.032
824	HET	80	NCI-H1944	MRK 003	0.704	1.063	0.9725
824	HET	7	NCI-H1944	AG 1024	0.927	0.996	0.946
824	HET	20	NCI-H1944	Geldanamycin	0.536	0.874	0.975
824	HET	6	NCI-H1944	PHA665752	0.841	0.847	NA
824	HET	53	NCI-H1944	KIN001-019/CGP60474	0.137	0.473	0.875
1206	HET	92	H2722	PP 242	0.335	0.599	0.834
824	HET	23	NCI-H1944	KN-93	0.55	0.827	0.916
824	HET	87	NCI-H1944	KIN001-134	0.342	0.437	0.891
824	HET	30	NCI-H1944	Sorafenib	1.01	0.87	0.866
824	HET	96	NCI-H1944	Pimozide	0.036	0.87	0.844
824	HET	32	NCI-H1944	KIN0001-006	0.879	0.973	0.893
824	HET	91	NCI-H1944	KIN-001-135	0.907	0.928	0.847
824	HET	56	NCI-H1944	KIN001-112/WH-4-023	0.771	1.102	0.961
824	HET	97	NCI-H1944	AZD6244	0.5595	0.6174	0.6505
824	HET	60	NCI-H1944	KIN001-124/NPK33-1-98-1 (BI-2356)	0.251	0.32	1.134
824	HET	109	NCI-H1944	Honokiol	0.0327	0.7501	1.0076
824	HET	86	NCI-H1944	KIN001-139	0.362	0.879	0.964
835	HET	54	NCI-H2405	KIN001-021/CGP082996	0.948	1.024	0.952
835	HET	10	NCI-H2405	L-685,458	1.015	1.07	0.874
835	HET	28	NCI-H2405	MLN8054	0.795	0.862	0.949
835	HET	80	NCI-H2405	MRK 003	0.7778	0.8452	0.9553
835	HET	84	NCI-H2405	AZ960	0.235	0.806	0.817
835	HET	7	NCI-H2405	AG 1024	0.798	0.796	0.72
835	HET	61	NCI-H2405	KIN001-125/AMG702	0.771	0.945	0.892
835	HET	88	NCI-H2405	MS275	NA	0.905	0.9
835	HET	111	NCI-H2405	Salubrinal	0.6994	0.9033	0.9548
803	HET	92	NCI-H522	PP 242	0.136	0.313	0.835
835	HET	57	NCI-H2405	KIN001-113/WH-4-025	0.388	0.463	0.807
835	HET	14	NCI-H2405	HKI-272	0.437	0.646	0.827
835	HET	89	NCI-H2405	Parthenolide	-0.019	0.776	0.837
835	HET	17	NCI-H2405	Cyclopamine	0.835	1.01	1.072
835	HET	34	NCI-H2405	KIN0001-014	1.058	1.087	1.021
835	HET	119	NCI-H2405	Lapatinib	0.9135	1.0987	1.1163
835	HET	4	NCI-H2405	LY294002	0.537	0.814	0.887
835	HET	104	NCI-H2405	Bortezomib/Velcade	0.0455	0.732	1.0683
835	HET	56	NCI-H2405	KIN001-112/WH-4-023	0.691	0.929	0.937
835	HET	127	NCI-H2405	KIN001-155	0.768	0.819	0.883
835	HET	38	NCI-H2405	KIN0001-045	0.849	1.056	1.063
835	HET	63	NCI-H2405	KIN001-127	0.824	0.932	1.083
835	HET	96	NCI-H2405	Pimozide	0.012	0.665	0.624
835	HET	94	NCI-H2405	TXG 221	0.781	0.819	0.875
835	HET	53	NCI-H2405	KIN001-019/CGP60474	0.219	0.881	0.92
835	HET	5	NCI-H2405	Sutent	0.375	0.796	0.913
701	HET	92	NCI-H841	PP 242	0.208	0.631	0.838
835	HET	95	NCI-H2405	DM3189	0.548	0.979	0.901
835	HET	62	NCI-H2405	KIN001-126	0.62	0.87	1.076
835	HET	66	NCI-H2405	HG-3-32-01	0.735	0.897	0.895
835	HET	13	NCI-H2405	CL-387,785	0.424	0.738	0.8
835	HET	105	NCI-H2405	MLN4924	0.2554	0.8069	0.9896
835	HET	86	NCI-H2405	KIN001-139	0.249	0.749	0.903
835	HET	87	NCI-H2405	KIN001-134	0.347	0.381	0.803
835	HET	37	NCI-H2405	KIN0001-023	0.704	1.092	0.937
835	HET	12	NCI-H2405	Cisplatin	0.886	0.903	0.89
835	HET	51	NCI-H2405	KIN001-005/BMS354825/Dasatinib	0.403	0.525	0.915
835	HET	20	NCI-H2405	Geldanamycin	0.33	0.375	0.79
835	HET	73	NCI-H2405	MKC-1	0.548	0.641	0.987
835	HET	110	NCI-H2405	Siliciclib/Roscovitine	0.4574	0.9134	1.0578
835	HET	8	NCI-H2405	SU6656	0.716	0.736	0.706
835	HET	11	NCI-H2405	Taxol	0.459	0.669	0.974
835	HET	1	NCI-H2405	Tarceva	0.678	0.87	0.964
835	HET	33	NCI-H2405	KIN0001-012	1.012	1.045	0.961
835	HET	52	NCI-H2405	KIN001-013	1.094	1.008	0.997
835	HET	16	NCI-H2405	JAK2 Inhibitor II	0.731	0.807	0.849
835	HET	109	NCI-H2405	Honokiol	0.0147	0.69	1.063
835	HET	106	NCI-H2405	XMD8-85	0.7199	1.009	1.0582
835	HET	100	NCI-H2405	AZ83146	0.2537	0.8591	1.1209
835	HET	32	NCI-H2405	KIN0001-006	0.841	0.839	0.973
835	HET	6	NCI-H2405	PHA665752	0.827	0.835	NA
835	HET	59	NCI-H2405	KIN001-123/WZ-1-84	0.989	0.907	1.07
835	HET	64	NCI-H2405	KIN001-128	0.818	0.857	0.999
835	HET	30	NCI-H2405	Sorafenib	0.845	0.853	0.894
835	HET	24	NCI-H2405	U-0126	0.49	0.786	0.918
835	HET	40	NCI-H2405	TP-155	0.253	0.995	1.001
835	HET	9	NCI-H2405	MG-132	0.235	1.059	0.844
835	HET	31	NCI-H2405	KIN0001-001	0.416	0.774	0.916
835	HET	55	NCI-H2405	KIN001-111/A770041	0.627	0.748	0.943
835	HET	71	NCI-H2405	Primethamine	1.277	1.243	0.966
835	HET	2	NCI-H2405	HCQ	0.867	0.914	0.948
835	HET	19	NCI-H2405	Go 6976	0.791	0.782	0.877
835	HET	35	NCI-H2405	KIN0001-017	0.518	0.86	1.016
835	HET	42	NCI-H2405	Y27632	0.968	0.922	1.06
835	HET	22	NCI-H2405	LM-1685	0.812	0.884	0.833
835	HET	45	NCI-H2405	Z-L-L-Norleucine-CHO	0.176	0.975	0.925
835	HET	27	NCI-H2405	JAK Inhibitor I	0.665	0.784	0.939
835	HET	99	NCI-H2405	AZD6474/Zactema	0.1788	0.8227	0.9888
835	HET	15	NCI-H2405	AG-957	0.827	0.787	0.853
822	HET	126	NCI-H1869	PFK222-666 (RAD001)	0.6275	0.6958	0.8405
835	HET	44	NCI-H2405	PD 98059	0.76	0.961	0.92
835	HET	36	NCI-H2405	KIN0001-022	0.957	1.031	0.951
835	HET	60	NCI-H2405	KIN001-124/NPK33-1-98-1 (BI-2356)	0.454	0.436	0.968
835	HET	91	NCI-H2405	KIN-001-135	0.972	0.906	0.889
835	HET	41	NCI-H2405	S-Trityl-L-cysteine	0.69	0.929	1.029
820	HET	92	NCI-H1755	PP 242	0.153	0.413	0.855
863	HET	126	COR-L 23/CPR	PFK222-666 (RAD001)	0.7576	0.6563	0.8601
835	HET	29	NCI-H2405	AZ628	0.578	0.634	0.696
835	HET	97	NCI-H2405	AZD6244	0.1638	0.4998	0.7404
835	HET	23	NCI-H2405	KN-93	0.412	0.81	0.931
835	HET	18	NCI-H2405	P38 MAPK Inhibitor	0.816	1	1.072
835	HET	98	NCI-H2405	AZD1152	0.7603	0.7155	0.7231
835	HET	68	NCI-H2405	BAY-1942	0.982	1.041	0.881
846	HET	41	NCI-H2030	S-Trityl-L-cysteine	0.374	1.075	1.112
846	HET	100	NCI-H2030	AZ83146	0.1785	0.9174	1.268
846	HET	6	NCI-H2030	PHA665752	0.93	1.059	0.995
846	HET	12	NCI-H2030	Cisplatin	0.859	1.035	1.036
846	HET	89	NCI-H2030	Parthenolide	0.083	0.836	0.852
846	HET	32	NCI-H2030	KIN0001-006	0.657	0.724	0.843
846	HET	20	NCI-H2030	Geldanamycin	0.521	0.766	1.03
846	HET	71	NCI-H2030	Primethamine	0.598	0.742	0.951
846	HET	7	NCI-H2030	AG 1024	1.066	1.024	0.974
846	HET	86	NCI-H2030	KIN001-139	0.526	1.068	0.963
846	HET	60	NCI-H2030	KIN001-124/NPK33-1-98-1 (BI-2356)	0.246	0.462	1.021
846	HET	43	NCI-H2030	Go 6983	0.829	0.988	1.125
846	HET	106	NCI-H2030	XMD8-85	0.5809	0.9404	1.0956
846	HET	57	NCI-H2030	KIN001-113/WH-4-025	0.876	0.914	1.054
846	HET	59	NCI-H2030	KIN001-123/WZ-1-84	0.791	0.975	0.853
846	HET	80	NCI-H2030	MRK 003	0.9968	1.0529	0.9797
821	HET	65	NCI-H1793	KIN001-130	0.209	0.354	0.866
846	HET	35	NCI-H2030	KIN0001-017	0.453	0.791	1.038
846	HET	28	NCI-H2030	MLN8054	0.521	0.737	0.907
846	HET	98	NCI-H2030	AZD1152	0.6031	0.725	0.7564
1204	HET	126	H2596	PFK222-666 (RAD001)	0.7225	0.7678	0.8699
846	HET	15	NCI-H2030	AG-957	0.97	0.978	0.938
1247	HET	92	NCI-H2291	PP 242	0.373	0.642	0.87
846	HET	91	NCI-H2030	KIN-001-135	0.907	1.102	1.151
846	HET	19	NCI-H2030	Go 6976	0.762	0.772	0.859
799	HET	92	NCI-H661	PP 242	0.073	0.608	0.881
846	HET	96	NCI-H2030	Pimozide	0.189	0.892	1.092
846	HET	93	NCI-H2030	KIN001-138	0.552	0.984	1.224
846	HET	54	NCI-H2030	KIN001-021/CGP082996	0.769	1.015	1.051
846	HET	53	NCI-H2030	KIN001-019/CGP60474	0.161	0.853	1.051
846	HET	44	NCI-H2030	PD 98059	0.769	0.831	0.981
846	HET	68	NCI-H2030	BAY-1942	0.7	0.877	0.99
846	HET	9	NCI-H2030	MG-132	0.335	0.865	0.878
846	HET	56	NCI-H2030	KIN001-112/WH-4-023	0.673	0.892	1.018
846	HET	31	NCI-H2030	KIN0001-001	0.529	0.983	0.941
846	HET	29	NCI-H2030	AZ628	0.622	0.771	0.884
846	HET	10	NCI-H2030	L-685,458	0.898	1.154	1.092
846	HET	87	NCI-H2030	KIN001-134	0.108	0.186	0.968
846	HET	63	NCI-H2030	KIN001-127	0.867	0.978	1.208
846	HET	22	NCI-H2030	LM-1685	0.784	1.026	0.987
846	HET	38	NCI-H2030	KIN0001-045	0.548	0.837	0.937
846	HET	66	NCI-H2030	HG-3-32-01	0.935	1.143	1.029
846	HET	110	NCI-H2030	Siliciclib/Roscovitine	0.3063	0.8594	0.9203
846	HET	27	NCI-H2030	JAK Inhibitor I	0.604	0.996	1.052
846	HET	33	NCI-H2030	KIN0001-012	0.918	0.969	0.993
846	HET	18	NCI-H2030	P38 MAPK Inhibitor	0.85	1.077	0.939
846	HET	45	NCI-H2030	Z-L-L-Norleucine-CHO	0.273	1	0.967
846	HET	34	NCI-H2030	KIN0001-014	0.941	0.917	0.961
846	HET	88	NCI-H2030	MS275	NA	0.729	0.902
846	HET	37	NCI-H2030	KIN0001-023	0.627	0.786	0.842
846	HET	30	NCI-H2030	Sorafenib	0.915	0.981	0.973
846	HET	8	NCI-H2030	SU6656	0.873	1.136	1.008
846	HET	84	NCI-H2030	AZ960	0.402	0.835	1.035
846	HET	62	NCI-H2030	KIN001-126	0.37	1.139	1.214
846	HET	109	NCI-H2030	Honokiol	0.0136	0.5722	1.0156
846	HET	17	NCI-H2030	Cyclopamine	0.779	0.876	0.967
846	HET	42	NCI-H2030	Y27632	0.909	1.043	1.066
824	HET	65	NCI-H1944	KIN001-130	0.316	0.897	0.883
846	HET	55	NCI-H2030	KIN001-111/A770041	0.651	0.837	1.057
846	HET	1	NCI-H2030	Tarceva	0.573	0.886	0.959
846	HET	11	NCI-H2030	Taxol	0.4	0.715	1.039
846	HET	97	NCI-H2030	AZD6244	0.4368	0.5854	0.7623
846	HET	16	NCI-H2030	JAK2 Inhibitor II	0.91	1.003	1.043
846	HET	73	NCI-H2030	MKC-1	0.529	0.774	0.95
846	HET	94	NCI-H2030	TXG 221	0.404	0.741	1.151
846	HET	51	NCI-H2030	KIN001-005/BMS354825/Dasatinib	0.401	0.625	0.887
846	HET	52	NCI-H2030	KIN001-013	0.846	0.989	0.957
846	HET	119	NCI-H2030	Lapatinib	0.6734	0.8601	0.9689
846	HET	13	NCI-H2030	CL-387,785	0.466	0.704	0.805
846	HET	14	NCI-H2030	HKI-272	0.479	0.571	0.837
846	HET	23	NCI-H2030	KN-93	0.525	1.02	1.005
846	HET	5	NCI-H2030	Sutent	0.514	1.127	1.131
846	HET	105	NCI-H2030	MLN4924	0.2512	0.6384	1.0043
846	HET	111	NCI-H2030	Salubrinal	0.7828	0.9736	1.0194
846	HET	61	NCI-H2030	KIN001-125/AMG702	0.908	1.115	1.199
846	HET	36	NCI-H2030	KIN0001-022	0.786	0.728	0.885
846	HET	24	NCI-H2030	U-0126	0.65	0.95	0.919
846	HET	64	NCI-H2030	KIN001-128	0.706	1.099	1.139
846	HET	2	NCI-H2030	HCQ	0.841	1.001	1.087
846	HET	104	NCI-H2030	Bortezomib/Velcade	0.087	0.7712	1.0391
846	HET	99	NCI-H2030	AZD6474/Zactema	0.0384	0.5392	0.9592
846	HET	40	NCI-H2030	TP-155	0.202	0.964	1.007
846	HET	95	NCI-H2030	DM3189	0.252	1.115	1.147
846	HET	4	NCI-H2030	LY294002	0.448	0.742	1.093
856	HET	2	HCC-366	HCQ	0.541	0.95	1.023
856	HET	24	HCC-366	U-0126	0.433	0.751	0.765
856	HET	63	HCC-366	KIN001-127	0.919	0.917	1.039
846	HET	125	NCI-H2030	BEZ235	0.3697	0.7482	0.8836
856	HET	8	HCC-366	SU6656	0.675	0.868	0.989
856	HET	109	HCC-366	Honokiol	0.0047	0.5265	1.116
856	HET	94	HCC-366	TXG 221	0.682	1.032	1.134
856	HET	55	HCC-366	KIN001-111/A770041	0.575	0.942	1.141
856	HET	93	HCC-366	KIN001-138	0.214	1.021	1.109
856	HET	98	HCC-366	AZD1152	0.172	0.1558	0.1997
856	HET	14	HCC-366	HKI-272	0.64	0.895	0.955
856	HET	45	HCC-366	Z-L-L-Norleucine-CHO	0.911	1.037	1.013
856	HET	34	HCC-366	KIN0001-014	0.974	1.03	1.004
856	HET	38	HCC-366	KIN0001-045	0.954	0.956	1.038
856	HET	41	HCC-366	S-Trityl-L-cysteine	0.624	0.94	0.969
856	HET	104	HCC-366	Bortezomib/Velcade	0.0445	1.1212	1.0802
856	HET	33	HCC-366	KIN0001-012	0.87	0.921	0.896
856	HET	32	HCC-366	KIN0001-006	0.862	0.804	0.961
1180	HET	83	NCI-H3122	JW-7-52-1	0.275	0.333	0.902
856	HET	27	HCC-366	JAK Inhibitor I	0.88	0.965	0.883
856	HET	1	HCC-366	Tarceva	0.579	0.965	0.875
856	HET	52	HCC-366	KIN001-013	0.952	1.124	1.242
856	HET	88	HCC-366	MS275	NA	0.237	1.124
856	HET	18	HCC-366	P38 MAPK Inhibitor	1.098	1.037	1.072
856	HET	56	HCC-366	KIN001-112/WH-4-023	0.718	0.937	1.172
856	HET	91	HCC-366	KIN-001-135	0.956	1.034	1.025
856	HET	40	HCC-366	TP-155	0.052	0.592	0.86
856	HET	95	HCC-366	DM3189	0.234	1.13	1.058
856	HET	35	HCC-366	KIN0001-017	0.752	0.974	1.005
856	HET	54	HCC-366	KIN001-021/CGP082996	0.766	0.96	1.219
856	HET	57	HCC-366	KIN001-113/WH-4-025	0.771	1.076	1.316
856	HET	105	HCC-366	MLN4924	0.1564	0.8754	1.0232
856	HET	68	HCC-366	BAY-1942	0.927	1.125	1.106
856	HET	44	HCC-366	PD 98059	1.067	0.975	1.033
856	HET	11	HCC-366	Taxol	0.072	0.208	1.034
856	HET	73	HCC-366	MKC-1	0.039	0.197	1.036
856	HET	111	HCC-366	Salubrinal	0.1439	0.5281	0.7625
856	HET	100	HCC-366	AZ83146	0.0544	0.5637	1.0874
856	HET	37	HCC-366	KIN0001-023	0.877	1.004	1.026
856	HET	89	HCC-366	Parthenolide	0.043	1.015	1.196
856	HET	20	HCC-366	Geldanamycin	0.11	0.933	1.03
856	HET	87	HCC-366	KIN001-134	0.01	0.018	0.977
856	HET	43	HCC-366	Go 6983	0.982	1.013	1.041
856	HET	31	HCC-366	KIN0001-001	0.904	1.008	0.95
856	HET	51	HCC-366	KIN001-005/BMS354825/Dasatinib	0.519	0.674	0.913
799	HET	126	NCI-H661	PFK222-666 (RAD001)	0.5729	0.6711	0.9022
856	HET	110	HCC-366	Siliciclib/Roscovitine	0.2561	0.8633	1.0482
856	HET	53	HCC-366	KIN001-019/CGP60474	0.028	0.488	1.21
856	HET	12	HCC-366	Cisplatin	0.897	1.024	0.95
856	HET	71	HCC-366	Primethamine	0.113	0.204	1.147
856	HET	22	HCC-366	LM-1685	0.915	0.98	0.914
856	HET	96	HCC-366	Pimozide	0.018	1.061	1.22
856	HET	97	HCC-366	AZD6244	0.2594	0.3177	0.4177
856	HET	106	HCC-366	XMD8-85	0.6149	0.8892	1.0185
856	HET	62	HCC-366	KIN001-126	0.175	0.87	0.929
856	HET	42	HCC-366	Y27632	1.035	1.026	0.974
856	HET	86	HCC-366	KIN001-139	0.241	0.899	1.147
1210	HET	126	H2803	PFK222-666 (RAD001)	0.6691	0.8142	0.9035
856	HET	84	HCC-366	AZ960	0.083	0.936	1.031
856	HET	10	HCC-366	L-685,458	0.894	0.978	1.005
856	HET	6	HCC-366	PHA665752	0.861	0.988	1.005
856	HET	19	HCC-366	Go 6976	0.603	0.754	1.033
856	HET	23	HCC-366	KN-93	0.224	0.948	0.991
856	HET	30	HCC-366	Sorafenib	1.029	0.945	0.995
856	HET	64	HCC-366	KIN001-128	1.045	0.903	0.93
856	HET	66	HCC-366	HG-3-32-01	0.884	1.014	1.159
856	HET	16	HCC-366	JAK2 Inhibitor II	0.808	0.904	0.952
856	HET	80	HCC-366	MRK 003	0.7986	0.9244	0.9055
856	HET	29	HCC-366	AZ628	0.909	0.937	0.989
856	HET	7	HCC-366	AG 1024	0.969	1.038	1.04
856	HET	5	HCC-366	Sutent	0.278	0.987	0.951
856	HET	119	HCC-366	Lapatinib	0.2721	1.2167	1.2335
856	HET	28	HCC-366	MLN8054	0.819	0.773	0.991
856	HET	36	HCC-366	KIN0001-022	0.999	1.033	1.019
856	HET	15	HCC-366	AG-957	0.969	0.98	1.056
856	HET	59	HCC-366	KIN001-123/WZ-1-84	0.911	1.08	1.059
856	HET	13	HCC-366	CL-387,785	0.137	0.606	0.989
856	HET	99	HCC-366	AZD6474/Zactema	0.0518	0.6975	1.0286
856	HET	4	HCC-366	LY294002	0.304	0.903	1.04
856	HET	17	HCC-366	Cyclopamine	0.914	1.072	0.92
874	HET	126	RERF-LC-Sq1	PFK222-666 (RAD001)	0.4592	0.6051	0.9091
856	HET	60	HCC-366	KIN001-124/NPK33-1-98-1 (BI-2356)	0.02	0.08	1.096
856	HET	9	HCC-366	MG-132	0.128	1.046	0.976
860	HET	119	LCLC-103H	Lapatinib	0.1723	1.0048	0.861
860	HET	30	LCLC-103H	Sorafenib	0.897	0.898	1.049
860	HET	7	LCLC-103H	AG 1024	1.012	1.002	0.926
860	HET	8	LCLC-103H	SU6656	0.736	0.99	0.921
860	HET	32	LCLC-103H	KIN0001-006	0.557	0.668	0.999
860	HET	66	LCLC-103H	HG-3-32-01	1.02	1.113	1.051
860	HET	44	LCLC-103H	PD 98059	0.825	0.868	0.98
860	HET	57	LCLC-103H	KIN001-113/WH-4-025	0.633	0.751	0.965
863	HET	92	COR-L 23/CPR	PP 242	0.457	0.487	0.91
860	HET	99	LCLC-103H	AZD6474/Zactema	0.0239	0.811	0.8345
860	HET	100	LCLC-103H	AZ83146	0.0437	0.5322	0.8433
877	HET	65	PC-3 [JPC-3]	KIN001-130	0.259	0.679	0.91
1206	HET	126	H2722	PFK222-666 (RAD001)	0.6892	0.7653	0.9234
860	HET	36	LCLC-103H	KIN0001-022	0.742	0.649	0.896
860	HET	104	LCLC-103H	Bortezomib/Velcade	0.0247	0.7938	0.7994
860	HET	16	LCLC-103H	JAK2 Inhibitor II	0.866	0.892	0.816
860	HET	64	LCLC-103H	KIN001-128	0.883	0.935	1.134
860	HET	23	LCLC-103H	KN-93	0.357	0.867	0.872
860	HET	38	LCLC-103H	KIN0001-045	0.81	0.791	1.153
860	HET	60	LCLC-103H	KIN001-124/NPK33-1-98-1 (BI-2356)	0.044	0.116	1.041
860	HET	28	LCLC-103H	MLN8054	0.665	0.78	0.921
835	HET	65	NCI-H2405	KIN001-130	0.375	0.698	0.924
860	HET	35	LCLC-103H	KIN0001-017	0.196	0.854	1.034
860	HET	42	LCLC-103H	Y27632	1.18	1.205	1.149
860	HET	56	LCLC-103H	KIN001-112/WH-4-023	0.57	0.899	1.085
860	HET	105	LCLC-103H	MLN4924	0.082	0.6215	0.89
860	HET	96	LCLC-103H	Pimozide	0.024	1.03	1.141
860	HET	37	LCLC-103H	KIN0001-023	0.582	0.89	0.946
860	HET	41	LCLC-103H	S-Trityl-L-cysteine	0.526	0.93	1.15
860	HET	17	LCLC-103H	Cyclopamine	0.88	0.87	0.786
860	HET	95	LCLC-103H	DM3189	0.054	1.25	1.297
860	HET	110	LCLC-103H	Siliciclib/Roscovitine	0.5051	0.8213	0.7795
860	HET	52	LCLC-103H	KIN001-013	0.958	1.003	1.006
860	HET	12	LCLC-103H	Cisplatin	1.006	0.962	0.794
860	HET	91	LCLC-103H	KIN-001-135	1.066	1.247	1.158
860	HET	80	LCLC-103H	MRK 003	0.6503	0.9939	1.0357
860	HET	10	LCLC-103H	L-685,458	0.882	0.857	0.822
860	HET	86	LCLC-103H	KIN001-139	-0.01	0.621	1.016
860	HET	1	LCLC-103H	Tarceva	0.906	0.925	0.791
860	HET	5	LCLC-103H	Sutent	0.464	0.946	0.952
860	HET	55	LCLC-103H	KIN001-111/A770041	0.79	0.955	1.126
860	HET	45	LCLC-103H	Z-L-L-Norleucine-CHO	0.091	0.947	0.884
860	HET	87	LCLC-103H	KIN001-134	0.029	0.08	1.046
860	HET	15	LCLC-103H	AG-957	0.954	0.974	0.971
860	HET	93	LCLC-103H	KIN001-138	0.622	1.116	1.252
860	HET	97	LCLC-103H	AZD6244	0.6513	0.7703	0.8297
860	HET	53	LCLC-103H	KIN001-019/CGP60474	0.021	0.737	1.092
860	HET	11	LCLC-103H	Taxol	0.087	0.283	0.779
860	HET	19	LCLC-103H	Go 6976	0.63	0.803	0.941
860	HET	13	LCLC-103H	CL-387,785	0.328	0.912	0.755
860	HET	33	LCLC-103H	KIN0001-012	1.074	1.229	1.226
860	HET	6	LCLC-103H	PHA665752	0.941	0.946	0.974
860	HET	63	LCLC-103H	KIN001-127	0.87	0.944	1.233
1180	HET	65	NCI-H3122	KIN001-130	0.426	0.789	0.926
860	HET	4	LCLC-103H	LY294002	0.317	0.846	0.907
860	HET	61	LCLC-103H	KIN001-125/AMG702	0.764	0.843	1.054
860	HET	22	LCLC-103H	LM-1685	0.637	0.834	0.872
860	HET	34	LCLC-103H	KIN0001-014	1.122	1.26	1.194
860	HET	54	LCLC-103H	KIN001-021/CGP082996	0.788	0.971	1.101
860	HET	18	LCLC-103H	P38 MAPK Inhibitor	0.728	0.78	0.772
860	HET	88	LCLC-103H	MS275	0.023	0.457	1.287
860	HET	73	LCLC-103H	MKC-1	0.231	0.304	1.002
860	HET	9	LCLC-103H	MG-132	0.053	0.849	0.709
860	HET	109	LCLC-103H	Honokiol	0.011	0.7223	0.8924
860	HET	24	LCLC-103H	U-0126	0.739	1.02	0.943
860	HET	31	LCLC-103H	KIN0001-001	0.675	1.078	1.175
860	HET	14	LCLC-103H	HKI-272	0.23	0.625	0.83
860	HET	106	LCLC-103H	XMD8-85	0.6592	0.9562	0.9092
860	HET	59	LCLC-103H	KIN001-123/WZ-1-84	0.952	0.997	1.09
860	HET	2	LCLC-103H	HCQ	1.01	0.951	0.947
860	HET	84	LCLC-103H	AZ960	0.199	1.033	1.229
860	HET	51	LCLC-103H	KIN001-005/BMS354825/Dasatinib	0.3	0.732	0.97
860	HET	71	LCLC-103H	Primethamine	0.444	0.919	1.049
860	HET	29	LCLC-103H	AZ628	0.842	0.959	0.953
860	HET	98	LCLC-103H	AZD1152	0.3882	0.452	0.4622
860	HET	62	LCLC-103H	KIN001-126	0.719	0.837	1.147
860	HET	40	LCLC-103H	TP-155	-0.009	0.787	0.894
860	HET	89	LCLC-103H	Parthenolide	0.006	0.971	1.126
860	HET	27	LCLC-103H	JAK Inhibitor I	0.732	1.061	1.096
860	HET	94	LCLC-103H	TXG 221	0.75	1.116	1.251
860	HET	111	LCLC-103H	Salubrinal	0.4709	0.83	0.9616
860	HET	68	LCLC-103H	BAY-1942	0.638	0.86	0.97
860	HET	20	LCLC-103H	Geldanamycin	0.535	1.051	0.953
863	HET	44	COR-L 23/CPR	PD 98059	0.888	1.064	0.98
863	HET	64	COR-L 23/CPR	KIN001-128	0.487	1.088	1.198
863	HET	100	COR-L 23/CPR	AZ83146	0.3739	1.1071	1.0473
863	HET	41	COR-L 23/CPR	S-Trityl-L-cysteine	0.519	1.026	0.955
863	HET	97	COR-L 23/CPR	AZD6244	0.4246	0.8187	0.9494
863	HET	14	COR-L 23/CPR	HKI-272	0.757	1.029	0.946
863	HET	20	COR-L 23/CPR	Geldanamycin	0.39	1.065	1.09
863	HET	42	COR-L 23/CPR	Y27632	0.97	0.997	1.043
863	HET	32	COR-L 23/CPR	KIN0001-006	0.619	0.716	0.929
863	HET	55	COR-L 23/CPR	KIN001-111/A770041	0.942	1.015	1.104
863	HET	88	COR-L 23/CPR	MS275	0.028	0.507	0.827
863	HET	22	COR-L 23/CPR	LM-1685	1.16	1.155	1.095
863	HET	15	COR-L 23/CPR	AG-957	1.093	1.101	1.152
863	HET	57	COR-L 23/CPR	KIN001-113/WH-4-025	0.985	0.997	1.038
863	HET	62	COR-L 23/CPR	KIN001-126	0.585	0.918	1.216
863	HET	104	COR-L 23/CPR	Bortezomib/Velcade	0.0135	1.189	1.0736
863	HET	30	COR-L 23/CPR	Sorafenib	0.937	0.908	0.862
820	HET	65	NCI-H1755	KIN001-130	0.32	0.71	0.927
863	HET	71	COR-L 23/CPR	Primethamine	0.324	0.771	1.154
863	HET	13	COR-L 23/CPR	CL-387,785	0.309	0.999	1.145
863	HET	23	COR-L 23/CPR	KN-93	0.736	1.152	1.177
863	HET	17	COR-L 23/CPR	Cyclopamine	1.048	1.112	1.05
863	HET	33	COR-L 23/CPR	KIN0001-012	1.069	1.012	1.084
863	HET	68	COR-L 23/CPR	BAY-1942	1.051	1.197	1.259
863	HET	87	COR-L 23/CPR	KIN001-134	0.236	0.163	0.832
863	HET	96	COR-L 23/CPR	Pimozide	0.367	0.923	0.975
863	HET	109	COR-L 23/CPR	Honokiol	0.0152	1.0657	1.3818
863	HET	106	COR-L 23/CPR	XMD8-85	0.9965	1.1508	1.1149
863	HET	98	COR-L 23/CPR	AZD1152	0.8444	0.8431	0.845
863	HET	53	COR-L 23/CPR	KIN001-019/CGP60474	0.058	0.914	1.125
863	HET	2	COR-L 23/CPR	HCQ	1.029	1.071	1.02
863	HET	51	COR-L 23/CPR	KIN001-005/BMS354825/Dasatinib	0.701	0.881	1
863	HET	40	COR-L 23/CPR	TP-155	0.133	1.13	0.992
863	HET	19	COR-L 23/CPR	Go 6976	0.657	0.982	1.12
863	HET	45	COR-L 23/CPR	Z-L-L-Norleucine-CHO	0.086	0.843	0.914
863	HET	35	COR-L 23/CPR	KIN0001-017	0.318	0.955	1.031
877	HET	92	PC-3 [JPC-3]	PP 242	0.26	0.692	0.929
863	HET	24	COR-L 23/CPR	U-0126	0.441	0.94	1.192
863	HET	31	COR-L 23/CPR	KIN0001-001	0.878	0.947	0.953
863	HET	89	COR-L 23/CPR	Parthenolide	0.004	0.794	1.11
863	HET	10	COR-L 23/CPR	L-685,458	0.986	1.108	1.092
1210	HET	125	H2803	BEZ235	0.3636	0.7414	0.9297
863	HET	27	COR-L 23/CPR	JAK Inhibitor I	1.035	1.132	1.095
863	HET	66	COR-L 23/CPR	HG-3-32-01	1.114	1.172	1.228
863	HET	36	COR-L 23/CPR	KIN0001-022	0.888	1.021	0.96
863	HET	93	COR-L 23/CPR	KIN001-138	0.759	0.98	1.192
863	HET	105	COR-L 23/CPR	MLN4924	0.2926	0.7451	1.1136
863	HET	16	COR-L 23/CPR	JAK2 Inhibitor II	1.123	1.04	1.21
863	HET	86	COR-L 23/CPR	KIN001-139	0.03	0.356	1.062
1206	HET	65	H2722	KIN001-130	0.395	0.637	0.933
863	HET	52	COR-L 23/CPR	KIN001-013	1.064	1.045	1.117
863	HET	11	COR-L 23/CPR	Taxol	0.29	0.416	0.9
863	HET	7	COR-L 23/CPR	AG 1024	0.977	0.937	1.101
863	HET	37	COR-L 23/CPR	KIN0001-023	0.623	0.883	0.939
863	HET	94	COR-L 23/CPR	TXG 221	0.924	1.022	1.013
803	HET	65	NCI-H522	KIN001-130	0.479	0.899	0.943
863	HET	110	COR-L 23/CPR	Siliciclib/Roscovitine	0.3704	0.9693	1.0902
863	HET	29	COR-L 23/CPR	AZ628	0.909	1.02	1.026
863	HET	91	COR-L 23/CPR	KIN-001-135	0.984	1.06	0.995
863	HET	60	COR-L 23/CPR	KIN001-124/NPK33-1-98-1 (BI-2356)	0.335	0.343	1.138
863	HET	63	COR-L 23/CPR	KIN001-127	1.033	1.091	1.196
863	HET	95	COR-L 23/CPR	DM3189	0.439	1.021	1.117
863	HET	1	COR-L 23/CPR	Tarceva	1.028	1.05	1.095
863	HET	18	COR-L 23/CPR	P38 MAPK Inhibitor	1.086	1.099	1.162
863	HET	119	COR-L 23/CPR	Lapatinib	0.6276	1.121	1.2644
863	HET	84	COR-L 23/CPR	AZ960	0.301	1.085	1.094
863	HET	43	COR-L 23/CPR	Go 6983	1.103	1.096	1.011
863	HET	5	COR-L 23/CPR	Sutent	0.592	0.951	1.052
863	HET	73	COR-L 23/CPR	MKC-1	0.194	0.316	1.188
863	HET	12	COR-L 23/CPR	Cisplatin	0.96	1.104	0.901
863	HET	99	COR-L 23/CPR	AZD6474/Zactema	0.1064	1.0369	1.1116
863	HET	56	COR-L 23/CPR	KIN001-112/WH-4-023	0.996	1.026	1.073
863	HET	28	COR-L 23/CPR	MLN8054	0.6	1.001	0.952
863	HET	8	COR-L 23/CPR	SU6656	1.126	0.997	1.122
863	HET	9	COR-L 23/CPR	MG-132	0.515	1.102	1.055
863	HET	80	COR-L 23/CPR	MRK 003	0.9051	0.8667	1.0064
863	HET	54	COR-L 23/CPR	KIN001-021/CGP082996	1.018	1.08	1.18
863	HET	34	COR-L 23/CPR	KIN0001-014	1.046	1.033	1.198
863	HET	59	COR-L 23/CPR	KIN001-123/WZ-1-84	1.021	1.128	1.159
863	HET	111	COR-L 23/CPR	Salubrinal	0.7951	1.1669	1.1131
863	HET	4	COR-L 23/CPR	LY294002	0.825	1.077	0.955
863	HET	38	COR-L 23/CPR	KIN0001-045	0.917	0.889	0.905
863	HET	6	COR-L 23/CPR	PHA665752	1.092	1.044	0.965
874	HET	30	RERF-LC-Sq1	Sorafenib	0.756	0.888	0.848
874	HET	55	RERF-LC-Sq1	KIN001-111/A770041	0.478	0.847	1.147
874	HET	38	RERF-LC-Sq1	KIN0001-045	0.752	0.973	1.024
874	HET	45	RERF-LC-Sq1	Z-L-L-Norleucine-CHO	0.12	0.841	0.886
874	HET	36	RERF-LC-Sq1	KIN0001-022	0.769	0.815	0.835
874	HET	84	RERF-LC-Sq1	AZ960	0.308	1.065	1.162
874	HET	59	RERF-LC-Sq1	KIN001-123/WZ-1-84	0.84	1.065	1.154
874	HET	97	RERF-LC-Sq1	AZD6244	0.4442	0.7228	1.014
874	HET	68	RERF-LC-Sq1	BAY-1942	0.779	0.976	0.996
874	HET	66	RERF-LC-Sq1	HG-3-32-01	1.052	1.018	1.226
874	HET	40	RERF-LC-Sq1	TP-155	0.155	0.954	0.919
874	HET	105	RERF-LC-Sq1	MLN4924	0.2015	0.5321	1.1088
874	HET	51	RERF-LC-Sq1	KIN001-005/BMS354825/Dasatinib	0.065	0.622	1.168
874	HET	17	RERF-LC-Sq1	Cyclopamine	0.735	0.921	1.083
874	HET	96	RERF-LC-Sq1	Pimozide	0.355	0.961	1.047
874	HET	73	RERF-LC-Sq1	MKC-1	0.236	0.539	1.032
874	HET	14	RERF-LC-Sq1	HKI-272	0.493	0.59	0.807
874	HET	34	RERF-LC-Sq1	KIN0001-014	0.798	0.949	0.937
874	HET	9	RERF-LC-Sq1	MG-132	0.222	0.783	0.823
874	HET	111	RERF-LC-Sq1	Salubrinal	0.3959	1.2658	1.2492
874	HET	87	RERF-LC-Sq1	KIN001-134	0.468	0.411	1.027
874	HET	62	RERF-LC-Sq1	KIN001-126	0.497	1.046	1.102
874	HET	104	RERF-LC-Sq1	Bortezomib/Velcade	0.0169	1.1489	0.9721
874	HET	32	RERF-LC-Sq1	KIN0001-006	0.742	0.824	0.909
874	HET	100	RERF-LC-Sq1	AZ83146	0.2543	0.8796	1.3024
874	HET	106	RERF-LC-Sq1	XMD8-85	0.6868	1.1568	1.0912
874	HET	95	RERF-LC-Sq1	DM3189	0.758	0.967	1.031
874	HET	54	RERF-LC-Sq1	KIN001-021/CGP082996	0.899	1.089	1.11
874	HET	11	RERF-LC-Sq1	Taxol	0.398	0.693	0.934
874	HET	1	RERF-LC-Sq1	Tarceva	0.574	0.691	0.861
874	HET	91	RERF-LC-Sq1	KIN-001-135	1.027	1.119	1.138
874	HET	119	RERF-LC-Sq1	Lapatinib	0.3106	0.4626	0.8526
874	HET	5	RERF-LC-Sq1	Sutent	0.586	0.85	0.923
874	HET	94	RERF-LC-Sq1	TXG 221	0.706	1.006	1.057
874	HET	89	RERF-LC-Sq1	Parthenolide	0.899	0.976	0.995
874	HET	110	RERF-LC-Sq1	Siliciclib/Roscovitine	0.6428	1.1222	1.0246
874	HET	57	RERF-LC-Sq1	KIN001-113/WH-4-025	0.529	0.876	1.212
874	HET	56	RERF-LC-Sq1	KIN001-112/WH-4-023	0.692	1.013	1.203
874	HET	20	RERF-LC-Sq1	Geldanamycin	0.542	0.911	1.074
874	HET	41	RERF-LC-Sq1	S-Trityl-L-cysteine	0.495	0.944	1.069
874	HET	109	RERF-LC-Sq1	Honokiol	0.0178	1.1856	1.1249
874	HET	19	RERF-LC-Sq1	Go 6976	0.663	0.917	0.957
874	HET	29	RERF-LC-Sq1	AZ628	0.549	0.834	0.945
874	HET	63	RERF-LC-Sq1	KIN001-127	0.928	1.124	1.147
874	HET	88	RERF-LC-Sq1	MS275	0.14	0.667	0.981
1204	HET	65	H2596	KIN001-130	0.566	0.789	0.95
874	HET	98	RERF-LC-Sq1	AZD1152	0.6396	0.8233	0.9852
860	HET	83	LCLC-103H	JW-7-52-1	0.136	0.285	0.952
874	HET	6	RERF-LC-Sq1	PHA665752	0.736	0.7	0.855
1212	HET	83	H2810	JW-7-52-1	0.364	0.683	0.952
874	HET	86	RERF-LC-Sq1	KIN001-139	0.148	1.005	1.104
874	HET	93	RERF-LC-Sq1	KIN001-138	0.893	1.176	1.281
874	HET	64	RERF-LC-Sq1	KIN001-128	0.895	1.101	1.131
874	HET	53	RERF-LC-Sq1	KIN001-019/CGP60474	0.055	0.947	1.161
874	HET	52	RERF-LC-Sq1	KIN001-013	1.06	1.107	1.142
874	HET	35	RERF-LC-Sq1	KIN0001-017	0.569	0.716	0.86
874	HET	37	RERF-LC-Sq1	KIN0001-023	0.675	0.865	0.816
803	HET	126	NCI-H522	PFK222-666 (RAD001)	0.6115	0.6602	0.9594
874	HET	71	RERF-LC-Sq1	Primethamine	0.372	0.526	0.907
874	HET	80	RERF-LC-Sq1	MRK 003	0.6011	1.1517	1.2652
874	HET	60	RERF-LC-Sq1	KIN001-124/NPK33-1-98-1 (BI-2356)	0.501	0.671	1.089
799	HET	125	NCI-H661	BEZ235	0.3736	0.8827	0.9694
874	HET	99	RERF-LC-Sq1	AZD6474/Zactema	0.0286	0.435	1.0401
877	HET	68	PC-3 [JPC-3]	BAY-1942	0.836	1.002	1.023
877	HET	51	PC-3 [JPC-3]	KIN001-005/BMS354825/Dasatinib	0.205	0.618	0.768
877	HET	19	PC-3 [JPC-3]	Go 6976	0.537	0.607	0.915
877	HET	33	PC-3 [JPC-3]	KIN0001-012	1.005	1.229	1.165
877	HET	99	PC-3 [JPC-3]	AZD6474/Zactema	0.16	0.3948	0.5236
877	HET	17	PC-3 [JPC-3]	Cyclopamine	0.982	1.095	1.056
877	HET	45	PC-3 [JPC-3]	Z-L-L-Norleucine-CHO	0.18	0.87	1.089
877	HET	4	PC-3 [JPC-3]	LY294002	0.665	0.923	1.021
877	HET	13	PC-3 [JPC-3]	CL-387,785	0.454	0.506	0.487
877	HET	40	PC-3 [JPC-3]	TP-155	0.078	0.471	0.886
877	HET	96	PC-3 [JPC-3]	Pimozide	0.652	1.03	1.084
877	HET	84	PC-3 [JPC-3]	AZ960	0.558	0.979	0.971
877	HET	20	PC-3 [JPC-3]	Geldanamycin	0.536	0.498	0.789
877	HET	52	PC-3 [JPC-3]	KIN001-013	0.842	0.84	0.907
877	HET	38	PC-3 [JPC-3]	KIN0001-045	0.491	0.665	0.919
877	HET	29	PC-3 [JPC-3]	AZ628	0.576	0.941	0.965
877	HET	1	PC-3 [JPC-3]	Tarceva	0.484	0.488	0.7
877	HET	91	PC-3 [JPC-3]	KIN-001-135	0.898	0.971	0.988
877	HET	30	PC-3 [JPC-3]	Sorafenib	0.661	0.89	0.981
877	HET	55	PC-3 [JPC-3]	KIN001-111/A770041	0.681	0.832	0.885
877	HET	62	PC-3 [JPC-3]	KIN001-126	0.396	0.772	0.873
877	HET	104	PC-3 [JPC-3]	Bortezomib/Velcade	0.043	0.8143	1.1472
877	HET	86	PC-3 [JPC-3]	KIN001-139	0.103	0.801	1.094
877	HET	9	PC-3 [JPC-3]	MG-132	0.308	0.983	0.975
877	HET	100	PC-3 [JPC-3]	AZ83146	0.4916	0.9208	0.8883
877	HET	8	PC-3 [JPC-3]	SU6656	0.917	0.937	0.915
877	HET	119	PC-3 [JPC-3]	Lapatinib	0.463	0.521	1.1662
877	HET	54	PC-3 [JPC-3]	KIN001-021/CGP082996	0.732	0.853	0.839
877	HET	34	PC-3 [JPC-3]	KIN0001-014	1.066	1.226	1.204
877	HET	41	PC-3 [JPC-3]	S-Trityl-L-cysteine	0.584	1.16	1.178
877	HET	87	PC-3 [JPC-3]	KIN001-134	0.348	0.288	1.035
877	HET	97	PC-3 [JPC-3]	AZD6244	0.6646	0.8941	0.9907
877	HET	23	PC-3 [JPC-3]	KN-93	0.669	0.795	0.927
877	HET	24	PC-3 [JPC-3]	U-0126	0.709	0.806	0.766
877	HET	71	PC-3 [JPC-3]	Primethamine	0.942	1.011	0.987
877	HET	88	PC-3 [JPC-3]	MS275	NA	0.626	0.929
877	HET	27	PC-3 [JPC-3]	JAK Inhibitor I	0.987	1.042	1.138
877	HET	35	PC-3 [JPC-3]	KIN0001-017	0.541	0.952	1.162
877	HET	43	PC-3 [JPC-3]	Go 6983	0.771	1.053	1.208
877	HET	18	PC-3 [JPC-3]	P38 MAPK Inhibitor	0.613	0.991	0.935
877	HET	5	PC-3 [JPC-3]	Sutent	0.719	0.943	0.896
877	HET	11	PC-3 [JPC-3]	Taxol	0.48	0.697	0.908
877	HET	95	PC-3 [JPC-3]	DM3189	0.822	0.996	1.053
877	HET	10	PC-3 [JPC-3]	L-685,458	0.918	0.94	1.093
877	HET	6	PC-3 [JPC-3]	PHA665752	0.836	0.853	0.807
877	HET	16	PC-3 [JPC-3]	JAK2 Inhibitor II	0.949	0.903	0.838
877	HET	56	PC-3 [JPC-3]	KIN001-112/WH-4-023	0.574	0.823	0.851
846	HET	65	NCI-H2030	KIN001-130	0.294	0.645	0.972
877	HET	66	PC-3 [JPC-3]	HG-3-32-01	0.816	0.919	0.954
877	HET	32	PC-3 [JPC-3]	KIN0001-006	0.692	0.764	0.739
877	HET	59	PC-3 [JPC-3]	KIN001-123/WZ-1-84	0.465	0.811	0.891
877	HET	44	PC-3 [JPC-3]	PD 98059	0.834	0.937	1.256
877	HET	37	PC-3 [JPC-3]	KIN0001-023	0.558	0.914	0.915
877	HET	106	PC-3 [JPC-3]	XMD8-85	0.8723	0.9193	1.096
877	HET	14	PC-3 [JPC-3]	HKI-272	0.447	0.485	0.684
877	HET	7	PC-3 [JPC-3]	AG 1024	0.928	0.89	0.917
877	HET	111	PC-3 [JPC-3]	Salubrinal	0.4072	0.892	0.8572
877	HET	110	PC-3 [JPC-3]	Siliciclib/Roscovitine	0.7086	0.9385	0.975
877	HET	73	PC-3 [JPC-3]	MKC-1	0.549	0.644	1.018
877	HET	80	PC-3 [JPC-3]	MRK 003	0.9223	0.9046	0.8993
877	HET	63	PC-3 [JPC-3]	KIN001-127	0.794	0.884	0.859
877	HET	2	PC-3 [JPC-3]	HCQ	0.949	0.877	0.93
877	HET	53	PC-3 [JPC-3]	KIN001-019/CGP60474	0.265	0.764	0.894
877	HET	12	PC-3 [JPC-3]	Cisplatin	0.809	0.927	0.944
877	HET	127	PC-3 [JPC-3]	KIN001-155	0.806	0.875	1.021
877	HET	109	PC-3 [JPC-3]	Honokiol	0.006	0.7653	1.0926
856	HET	65	HCC-366	KIN001-130	0.124	0.707	0.972
877	HET	36	PC-3 [JPC-3]	KIN0001-022	0.992	1.021	1.077
877	HET	28	PC-3 [JPC-3]	MLN8054	0.863	0.935	1.09
877	HET	57	PC-3 [JPC-3]	KIN001-113/WH-4-025	0.528	0.57	0.844
877	HET	60	PC-3 [JPC-3]	KIN001-124/NPK33-1-98-1 (BI-2356)	0.353	0.521	0.852
877	HET	22	PC-3 [JPC-3]	LM-1685	0.852	0.835	0.896
877	HET	105	PC-3 [JPC-3]	MLN4924	0.555	0.7813	1.075
877	HET	94	PC-3 [JPC-3]	TXG 221	0.761	0.97	0.967
877	HET	98	PC-3 [JPC-3]	AZD1152	0.7492	0.8113	0.8698
877	HET	31	PC-3 [JPC-3]	KIN0001-001	0.436	0.911	0.97
877	HET	64	PC-3 [JPC-3]	KIN001-128	0.624	0.845	0.911
877	HET	89	PC-3 [JPC-3]	Parthenolide	0.158	0.801	0.978
822	HET	92	NCI-H1869	PP 242	0.21	0.595	0.984
1212	HET	92	H2810	PP 242	0.323	0.706	0.988
877	HET	15	PC-3 [JPC-3]	AG-957	0.872	0.992	0.947
1212	HET	65	H2810	KIN001-130	0.511	0.957	0.993
877	HET	42	PC-3 [JPC-3]	Y27632	1.175	1.24	1.308
886	HET	17	EBC-1	Cyclopamine	0.837	0.975	1.019
886	HET	30	EBC-1	Sorafenib	0.928	1.022	0.977
886	HET	68	EBC-1	BAY-1942	0.723	0.96	0.974
886	HET	2	EBC-1	HCQ	0.745	0.913	0.879
886	HET	97	EBC-1	AZD6244	0.0789	0.2653	0.6331
886	HET	16	EBC-1	JAK2 Inhibitor II	1.06	1.082	1.065
886	HET	105	EBC-1	MLN4924	0.0717	0.3439	0.9735
886	HET	52	EBC-1	KIN001-013	1.256	1.209	1.363
886	HET	61	EBC-1	KIN001-125/AMG702	0.893	1.094	1.104
886	HET	86	EBC-1	KIN001-139	0.137	0.553	0.835
886	HET	6	EBC-1	PHA665752	0.204	0.18	0.999
886	HET	59	EBC-1	KIN001-123/WZ-1-84	1.07	1.102	1.153
886	HET	28	EBC-1	MLN8054	0.461	0.936	1.002
886	HET	33	EBC-1	KIN0001-012	0.957	1.049	0.968
886	HET	24	EBC-1	U-0126	0.391	0.792	1.006
886	HET	18	EBC-1	P38 MAPK Inhibitor	0.756	0.868	0.929
886	HET	31	EBC-1	KIN0001-001	0.449	0.951	1.008
886	HET	43	EBC-1	Go 6983	0.654	1.085	1.307
886	HET	29	EBC-1	AZ628	0.652	0.904	1.042
886	HET	89	EBC-1	Parthenolide	0.03	0.809	0.921
886	HET	56	EBC-1	KIN001-112/WH-4-023	0.813	0.9	1.061
886	HET	14	EBC-1	HKI-272	0.572	0.854	1.036
886	HET	71	EBC-1	Primethamine	0.965	1.061	1.267
886	HET	64	EBC-1	KIN001-128	0.939	0.82	1.07
886	HET	95	EBC-1	DM3189	0.245	1.064	1.119
886	HET	36	EBC-1	KIN0001-022	0.935	0.982	1.064
886	HET	8	EBC-1	SU6656	1.003	0.984	0.932
886	HET	11	EBC-1	Taxol	0.227	0.29	0.942
1247	HET	65	NCI-H2291	KIN001-130	0.455	0.988	0.998
886	HET	55	EBC-1	KIN001-111/A770041	0.847	1.041	1.068
886	HET	34	EBC-1	KIN0001-014	1.052	0.992	1.118
886	HET	32	EBC-1	KIN0001-006	0.479	0.484	0.987
874	HET	83	RERF-LC-Sq1	JW-7-52-1	0.203	0.434	1.001
886	HET	4	EBC-1	LY294002	0.253	0.707	0.898
886	HET	1	EBC-1	Tarceva	0.809	0.866	0.841
886	HET	19	EBC-1	Go 6976	0.901	1.013	1.147
886	HET	57	EBC-1	KIN001-113/WH-4-025	0.895	0.862	1.079
886	HET	53	EBC-1	KIN001-019/CGP60474	0.364	0.878	1.214
886	HET	5	EBC-1	Sutent	0.536	0.955	0.971
886	HET	66	EBC-1	HG-3-32-01	0.965	0.95	1.017
886	HET	20	EBC-1	Geldanamycin	0.288	0.31	0.531
886	HET	12	EBC-1	Cisplatin	0.843	0.949	0.925
886	HET	80	EBC-1	MRK 003	0.513	0.751	0.893
886	HET	73	EBC-1	MKC-1	0.185	0.577	1.13
886	HET	106	EBC-1	XMD8-85	0.3607	0.9458	1.0031
886	HET	44	EBC-1	PD 98059	0.88	1.114	1.126
886	HET	60	EBC-1	KIN001-124/NPK33-1-98-1 (BI-2356)	0.678	0.514	1.234
886	HET	63	EBC-1	KIN001-127	0.845	0.908	1.156
886	HET	9	EBC-1	MG-132	0.144	0.869	0.894
886	HET	40	EBC-1	TP-155	0.104	0.278	0.721
886	HET	27	EBC-1	JAK Inhibitor I	1.216	0.991	1.093
886	HET	91	EBC-1	KIN-001-135	1.095	1.121	1.181
886	HET	99	EBC-1	AZD6474/Zactema	0.0633	0.6825	0.7919
886	HET	119	EBC-1	Lapatinib	0.2555	1.0939	1.2058
886	HET	15	EBC-1	AG-957	0.923	1.171	1.16
886	HET	100	EBC-1	AZ83146	0.0416	0.4911	0.8781
886	HET	111	EBC-1	Salubrinal	0.344	1.1547	1.2659
886	HET	62	EBC-1	KIN001-126	0.844	0.987	1.135
886	HET	10	EBC-1	L-685,458	0.754	0.856	0.806
886	HET	45	EBC-1	Z-L-L-Norleucine-CHO	0.038	1.037	1.159
886	HET	109	EBC-1	Honokiol	0.0056	0.585	1.0267
886	HET	88	EBC-1	MS275	0.057	0.336	0.946
886	HET	98	EBC-1	AZD1152	0.4133	0.5645	0.6068
886	HET	84	EBC-1	AZ960	0.303	0.927	1.051
701	HET	125	NCI-H841	BEZ235	0.2305	0.7317	1.0088
886	HET	42	EBC-1	Y27632	0.823	1.121	1.147
886	HET	51	EBC-1	KIN001-005/BMS354825/Dasatinib	0.954	1.188	1.293
1180	HET	92	NCI-H3122	PP 242	0.178	0.372	1.018
886	HET	37	EBC-1	KIN0001-023	0.144	0.188	0.865
886	HET	93	EBC-1	KIN001-138	1.042	1.049	1.12
886	HET	87	EBC-1	KIN001-134	0.257	0.159	0.876
886	HET	94	EBC-1	TXG 221	0.429	1.002	1.175
886	HET	96	EBC-1	Pimozide	0.015	0.679	0.759
886	HET	38	EBC-1	KIN0001-045	0.821	0.96	0.978
886	HET	35	EBC-1	KIN0001-017	0.308	0.752	0.975
886	HET	104	EBC-1	Bortezomib/Velcade	-0.0145	0.7907	1.0582
886	HET	110	EBC-1	Siliciclib/Roscovitine	0.3971	0.8749	0.8866
1180	HET	125	NCI-H3122	BEZ235	0.4005	0.8282	1.0277
886	HET	22	EBC-1	LM-1685	0.786	0.981	1.069
886	HET	58	EBC-1	KIN001-122/JW-2-8-1	1.014	1.039	1.009
886	HET	54	EBC-1	KIN001-021/CGP082996	0.715	0.932	1.138
886	HET	41	EBC-1	S-Trityl-L-cysteine	0.12	1.169	1.162
886	HET	7	EBC-1	AG 1024	1.05	0.979	0.926
886	HET	13	EBC-1	CL-387,785	0.375	0.925	0.961
886	HET	23	EBC-1	KN-93	0.181	0.963	1.034
1180	HET	9	NCI-H3122	MG-132	0.16	0.941	0.928
1180	HET	94	NCI-H3122	TXG 221	0.878	1.075	1.08
1180	HET	91	NCI-H3122	KIN-001-135	1.133	1.142	1.013
1180	HET	53	NCI-H3122	KIN001-019/CGP60474	0.097	1.267	1.273
1180	HET	68	NCI-H3122	BAY-1942	1.077	1.129	1.171
1180	HET	1	NCI-H3122	Tarceva	1.036	0.843	0.817
1180	HET	96	NCI-H3122	Pimozide	0.089	0.98	1.012
1180	HET	89	NCI-H3122	Parthenolide	0.703	1.097	1.076
1247	HET	126	NCI-H2291	PFK222-666 (RAD001)	0.7277	0.8486	1.0281
1180	HET	36	NCI-H3122	KIN0001-022	1.178	1.191	0.968
1180	HET	100	NCI-H3122	AZ83146	0.2062	0.9976	1.1751
1180	HET	99	NCI-H3122	AZD6474/Zactema	0.3564	1.0663	1.1996
820	HET	125	NCI-H1755	BEZ235	0.3852	0.9018	1.0378
1180	HET	20	NCI-H3122	Geldanamycin	0.243	0.306	0.729
1180	HET	6	NCI-H3122	PHA665752	1.328	1.117	1.153
1180	HET	62	NCI-H3122	KIN001-126	0.746	0.839	0.978
1180	HET	88	NCI-H3122	MS275	0.192	0.495	1.083
1180	HET	73	NCI-H3122	MKC-1	0.259	0.478	1.174
1180	HET	63	NCI-H3122	KIN001-127	0.876	0.854	0.912
1180	HET	58	NCI-H3122	KIN001-122/JW-2-8-1	1.065	1.199	1.088
1180	HET	14	NCI-H3122	HKI-272	0.644	1.161	1.16
1180	HET	56	NCI-H3122	KIN001-112/WH-4-023	1.194	1.055	1.235
1180	HET	29	NCI-H3122	AZ628	0.637	1.08	1.189
1180	HET	32	NCI-H3122	KIN0001-006	0.649	0.698	1.009
1180	HET	71	NCI-H3122	Primethamine	0.665	1.1	1.132
1180	HET	17	NCI-H3122	Cyclopamine	0.623	0.998	0.899
1180	HET	66	NCI-H3122	HG-3-32-01	0.78	0.824	0.855
1180	HET	86	NCI-H3122	KIN001-139	0.043	0.219	1.116
1180	HET	45	NCI-H3122	Z-L-L-Norleucine-CHO	0.229	1.221	1.015
1180	HET	37	NCI-H3122	KIN0001-023	0.19	0.602	0.746
856	HET	125	HCC-366	BEZ235	0.2192	0.6812	1.0381
1180	HET	111	NCI-H3122	Salubrinal	0.4031	0.8765	0.8762
1180	HET	119	NCI-H3122	Lapatinib	0.8142	1.0801	1.094
1180	HET	87	NCI-H3122	KIN001-134	0.173	0.116	0.763
1180	HET	55	NCI-H3122	KIN001-111/A770041	1.126	1.272	1.301
1180	HET	51	NCI-H3122	KIN001-005/BMS354825/Dasatinib	1.217	1.111	1.014
1180	HET	67	NCI-H3122	GST-MDA-7	0.024	0.924	1.036
1180	HET	59	NCI-H3122	KIN001-123/WZ-1-84	1.044	0.937	1.072
1180	HET	80	NCI-H3122	MRK 003	0.8864	0.9992	1.1631
1180	HET	105	NCI-H3122	MLN4924	0.3036	0.7404	1.0634
1180	HET	106	NCI-H3122	XMD8-85	0.7741	0.8698	0.9491
860	HET	125	LCLC-103H	BEZ235	0.2467	0.8973	1.0448
1180	HET	38	NCI-H3122	KIN0001-045	0.607	0.73	0.644
1180	HET	41	NCI-H3122	S-Trityl-L-cysteine	0.179	0.974	1.109
1180	HET	64	NCI-H3122	KIN001-128	0.931	0.913	0.91
1180	HET	30	NCI-H3122	Sorafenib	0.551	1.088	1.084
1180	HET	84	NCI-H3122	AZ960	0.136	0.511	1.193
1180	HET	34	NCI-H3122	KIN0001-014	1.194	1.223	1.081
1180	HET	5	NCI-H3122	Sutent	0.469	1.087	1.046
1180	HET	11	NCI-H3122	Taxol	0.074	0.251	0.978
1180	HET	54	NCI-H3122	KIN001-021/CGP082996	0.99	1.356	1.334
1180	HET	61	NCI-H3122	KIN001-125/AMG702	1.068	0.826	0.871
1180	HET	104	NCI-H3122	Bortezomib/Velcade	0.216	1.2286	0.9804
1180	HET	93	NCI-H3122	KIN001-138	0.756	1.026	1.073
1180	HET	97	NCI-H3122	AZD6244	0.2499	0.5332	0.8802
1180	HET	52	NCI-H3122	KIN001-013	1.465	1.366	1.417
1180	HET	110	NCI-H3122	Siliciclib/Roscovitine	0.3617	0.7647	0.7383
1180	HET	57	NCI-H3122	KIN001-113/WH-4-025	1.111	1.269	1.221
1180	HET	60	NCI-H3122	KIN001-124/NPK33-1-98-1 (BI-2356)	0.298	0.148	0.996
1180	HET	95	NCI-H3122	DM3189	0.699	0.905	0.963
1180	HET	35	NCI-H3122	KIN0001-017	0.179	0.226	0.292
877	HET	125	PC-3 [JPC-3]	BEZ235	0.5086	0.9857	1.0619
1180	HET	40	NCI-H3122	TP-155	0.019	0.59	0.67
1180	HET	19	NCI-H3122	Go 6976	0.569	0.826	0.996
1180	HET	109	NCI-H3122	Honokiol	0.0024	0.7787	0.8734
1180	HET	98	NCI-H3122	AZD1152	0.5532	0.6455	0.6591
1204	HET	55	H2596	KIN001-111/A770041	1.016	1.047	1.019
1204	HET	29	H2596	AZ628	0.736	1.038	1.018
1204	HET	110	H2596	Siliciclib/Roscovitine	0.7486	1.1631	1.1087
1204	HET	64	H2596	KIN001-128	0.809	0.909	0.988
1204	HET	95	H2596	DM3189	0.766	0.92	1.044
886	HET	92	EBC-1	PP 242	0.137	0.545	1.066
1204	HET	6	H2596	PHA665752	1.028	1.088	1.01
1204	HET	59	H2596	KIN001-123/WZ-1-84	0.894	0.952	0.969
1204	HET	40	H2596	TP-155	0.527	0.767	0.731
1204	HET	57	H2596	KIN001-113/WH-4-025	0.64	0.761	0.944
1204	HET	66	H2596	HG-3-32-01	1.106	0.981	0.992
874	HET	92	RERF-LC-Sq1	PP 242	0.2	0.766	1.074
1204	HET	91	H2596	KIN-001-135	0.903	0.979	1.025
1204	HET	32	H2596	KIN0001-006	0.945	1.18	1
1204	HET	51	H2596	KIN001-005/BMS354825/Dasatinib	0.597	1.018	0.902
1204	HET	109	H2596	Honokiol	0.0223	1.1121	1.2565
1204	HET	9	H2596	MG-132	0.238	0.781	0.848
1204	HET	80	H2596	MRK 003	1.1575	1.1962	1.0858
1204	HET	20	H2596	Geldanamycin	0.709	0.935	1.089
1204	HET	105	H2596	MLN4924	0.354	1.13519	1.0213
860	HET	65	LCLC-103H	KIN001-130	0.272	0.754	1.076
1204	HET	100	H2596	AZ83146	0.1999	1.0566	1.2439
863	HET	125	COR-L 23/CPR	BEZ235	0.2849	0.9043	1.079
1204	HET	45	H2596	Z-L-L-Norleucine-CHO	0.103	1.235	0.982
1204	HET	73	H2596	MKC-1	0.818	1.211	0.95
1204	HET	41	H2596	S-Trityl-L-cysteine	0.967	1.223	1.017
1204	HET	35	H2596	KIN0001-017	0.611	1.105	1.107
1204	HET	34	H2596	KIN0001-014	1.031	1.217	0.998
1204	HET	104	H2596	Bortezomib/Velcade	0.0434	1.0134	0.9506
1204	HET	5	H2596	Sutent	0.949	1.128	0.943
1204	HET	30	H2596	Sorafenib	0.953	1.263	0.996
1204	HET	37	H2596	KIN0001-023	0.857	0.974	0.879
1204	HET	36	H2596	KIN0001-022	0.747	1.001	1.008
1204	HET	14	H2596	HKI-272	0.827	0.897	0.914
1204	HET	89	H2596	Parthenolide	0.171	0.913	1.072
1204	HET	88	H2596	MS275	NA	0.893	1.054
1204	HET	98	H2596	AZD1152	0.8051	0.7282	0.7048
1204	HET	86	H2596	KIN001-139	0.882	0.962	1.009
1212	HET	125	H2810	BEZ235	0.6277	0.9627	1.0804
1204	HET	11	H2596	Taxol	0.794	0.984	0.979
1204	HET	111	H2596	Salubrinal	0.8531	0.9427	0.9923
1204	HET	19	H2596	Go 6976	0.99	1.082	1.039
1204	HET	63	H2596	KIN001-127	0.884	0.933	0.982
1204	HET	96	H2596	Pimozide	0.836	0.906	0.9
1204	HET	38	H2596	KIN0001-045	0.514	0.651	0.741
1204	HET	60	H2596	KIN001-124/NPK33-1-98-1 (BI-2356)	0.681	0.98	0.993
1204	HET	68	H2596	BAY-1942	1.013	1.169	1.037
1204	HET	119	H2596	Lapatinib	1.1213	1.0809	1.0853
1204	HET	87	H2596	KIN001-134	0.901	0.881	0.987
1204	HET	17	H2596	Cyclopamine	1.002	1.074	1.053
1204	HET	99	H2596	AZD6474/Zactema	0.0789	1.0891	1.217
1204	HET	56	H2596	KIN001-112/WH-4-023	0.791	0.964	0.988
1204	HET	97	H2596	AZD6244	0.4999	0.7196	0.7338
1204	HET	52	H2596	KIN001-013	0.968	1.036	1.039
1204	HET	54	H2596	KIN001-021/CGP082996	0.905	0.983	1.039
1204	HET	94	H2596	TXG 221	0.703	0.834	0.979
1204	HET	106	H2596	XMD8-85	0.4231	0.9937	0.9972
1204	HET	84	H2596	AZ960	0.536	0.907	0.989
1204	HET	53	H2596	KIN001-019/CGP60474	0.451	0.833	0.992
1204	HET	93	H2596	KIN001-138	0.535	0.652	0.895
1204	HET	71	H2596	Primethamine	1.095	1.25	1.034
1204	HET	1	H2596	Tarceva	0.691	0.715	0.71
1204	HET	62	H2596	KIN001-126	0.803	0.905	1.004
1206	HET	35	H2722	KIN0001-017	0.006	0.499	0.983
1206	HET	11	H2722	Taxol	0.286	0.429	0.534
860	HET	92	LCLC-103H	PP 242	0.275	0.74	1.087
1206	HET	6	H2722	PHA665752	0.527	0.844	0.944
1206	HET	111	H2722	Salubrinal	0.7887	0.9996	0.8298
822	HET	125	NCI-H1869	BEZ235	0.5605	0.9434	1.0875
1206	HET	88	H2722	MS275	NA	0.781	0.944
1206	HET	93	H2722	KIN001-138	0.33	0.515	0.815
1206	HET	63	H2722	KIN001-127	0.828	1.031	0.91
1206	HET	99	H2722	AZD6474/Zactema	0.0788	1.2165	1.2287
1206	HET	105	H2722	MLN4924	0.4107	0.8476	1.2592
1206	HET	34	H2722	KIN0001-014	0.879	1.015	1.123
821	HET	125	NCI-H1793	BEZ235	0.1828	0.581	1.0885
1206	HET	52	H2722	KIN001-013	1.267	1.149	1.294
1204	HET	125	H2596	BEZ235	0.5418	0.9161	1.0921
1206	HET	91	H2722	KIN-001-135	1.011	0.982	0.943
1206	HET	62	H2722	KIN001-126	0.72	0.99	0.907
1206	HET	40	H2722	TP-155	0.004	0.202	0.777
1206	HET	9	H2722	MG-132	0.018	0.113	0.723
1206	HET	97	H2722	AZD6244	0.7492	0.8894	1.0984
1206	HET	32	H2722	KIN0001-006	0.602	0.713	0.747
1206	HET	80	H2722	MRK 003	0.9056	1.0488	1.1069
1206	HET	36	H2722	KIN0001-022	0.679	0.964	1.165
1206	HET	66	H2722	HG-3-32-01	0.901	1.02	0.978
1206	HET	41	H2722	S-Trityl-L-cysteine	0.351	0.429	0.684
1206	HET	94	H2722	TXG 221	0.857	0.914	0.979
1206	HET	100	H2722	AZ83146	0.3837	0.9809	1.1214
1206	HET	38	H2722	KIN0001-045	0.679	0.733	0.811
1206	HET	29	H2722	AZ628	0.634	0.785	0.944
1206	HET	37	H2722	KIN0001-023	0.43	0.822	1.019
1206	HET	51	H2722	KIN001-005/BMS354825/Dasatinib	0.458	0.54	0.995
1206	HET	19	H2722	Go 6976	0.832	0.896	1.073
1206	HET	60	H2722	KIN001-124/NPK33-1-98-1 (BI-2356)	0.138	0.336	0.896
1206	HET	54	H2722	KIN001-021/CGP082996	0.801	1.259	1.216
1206	HET	98	H2722	AZD1152	0.966	0.7949	0.8172
1206	HET	119	H2722	Lapatinib	0.7223	0.9705	0.9432
1206	HET	71	H2722	Primethamine	0.861	1.271	1.242
1206	HET	64	H2722	KIN001-128	0.544	1.089	0.954
1206	HET	95	H2722	DM3189	0.697	0.964	0.949
1206	HET	109	H2722	Honokiol	0.0382	0.9757	1.2661
1206	HET	68	H2722	BAY-1942	1.025	1.006	0.953
1206	HET	5	H2722	Sutent	0.398	0.694	0.969
1206	HET	30	H2722	Sorafenib	0.728	1.053	1.124
1206	HET	73	H2722	MKC-1	0.463	0.664	1.135
1206	HET	96	H2722	Pimozide	0.553	0.995	1.003
1206	HET	1	H2722	Tarceva	0.672	0.918	0.926
1206	HET	84	H2722	AZ960	0.382	0.946	0.987
1206	HET	59	H2722	KIN001-123/WZ-1-84	0.982	1.057	0.875
1206	HET	110	H2722	Siliciclib/Roscovitine	0.8974	1.2263	1.1935
1206	HET	55	H2722	KIN001-111/A770041	1.115	1.148	1.133
1206	HET	106	H2722	XMD8-85	0.7628	1.0909	1.0848
886	HET	125	EBC-1	BEZ235	0.2269	0.8796	1.0954
1206	HET	56	H2722	KIN001-112/WH-4-023	0.73	1.074	1.174
1206	HET	20	H2722	Geldanamycin	0.285	0.343	0.61
1206	HET	45	H2722	Z-L-L-Norleucine-CHO	0.028	0.13	0.819
1206	HET	17	H2722	Cyclopamine	0.6	0.87	0.958
1206	HET	53	H2722	KIN001-019/CGP60474	0.249	0.195	0.391
1206	HET	14	H2722	HKI-272	0.459	0.587	0.907
1206	HET	86	H2722	KIN001-139	0.242	0.776	0.944
1206	HET	57	H2722	KIN001-113/WH-4-025	0.947	1.108	1.049
1206	HET	104	H2722	Bortezomib/Velcade	0.0623	1.0502	1.0971
1206	HET	89	H2722	Parthenolide	0.405	0.993	0.944
1206	HET	87	H2722	KIN001-134	0.367	0.553	0.957
1210	HET	87	H2803	KIN001-134	0.597	0.857	1.028
1210	HET	66	H2803	HG-3-32-01	1.057	1.253	1.239
1210	HET	80	H2803	MRK 003	0.9906	0.961	0.9458
1210	HET	110	H2803	Siliciclib/Roscovitine	0.7038	0.9169	0.9498
1210	HET	5	H2803	Sutent	0.404	0.747	0.939
1210	HET	57	H2803	KIN001-113/WH-4-025	0.487	0.663	1.04
1210	HET	98	H2803	AZD1152	0.7931	0.8968	0.9839
1210	HET	105	H2803	MLN4924	1.0942	1.0105	1.0096
1210	HET	71	H2803	Primethamine	0.751	0.932	0.912
1210	HET	111	H2803	Salubrinal	0.7493	1.0652	1.1532
1210	HET	51	H2803	KIN001-005/BMS354825/Dasatinib	0.479	0.968	1.115
1210	HET	89	H2803	Parthenolide	0.16	0.926	0.837
1210	HET	62	H2803	KIN001-126	0.317	0.826	1.181
1247	HET	125	NCI-H2291	BEZ235	0.5948	0.9359	1.0956
1210	HET	34	H2803	KIN0001-014	0.809	1.03	0.962
1210	HET	100	H2803	AZ83146	0.5682	0.8266	0.9486
1210	HET	119	H2803	Lapatinib	0.8211	0.9306	0.8622
1210	HET	1	H2803	Tarceva	0.692	0.853	0.846
1210	HET	86	H2803	KIN001-139	0.809	1.083	1.07
1210	HET	60	H2803	KIN001-124/NPK33-1-98-1 (BI-2356)	0.47	1.118	1.21
803	HET	125	NCI-H522	BEZ235	0.35	0.9475	1.1026
1210	HET	109	H2803	Honokiol	0.0303	0.8471	0.9693
1210	HET	32	H2803	KIN0001-006	0.526	0.763	0.881
1210	HET	19	H2803	Go 6976	0.654	0.899	0.815
1210	HET	99	H2803	AZD6474/Zactema	0.5102	0.8074	0.9953
1210	HET	36	H2803	KIN0001-022	0.573	0.832	1.013
1210	HET	73	H2803	MKC-1	0.417	0.69	0.914
1210	HET	6	H2803	PHA665752	0.65	0.993	1.076
1210	HET	106	H2803	XMD8-85	0.7966	0.8759	0.9864
1210	HET	14	H2803	HKI-272	0.351	0.543	0.939
1210	HET	59	H2803	KIN001-123/WZ-1-84	0.796	1.015	1.236
1210	HET	38	H2803	KIN0001-045	0.615	0.774	0.748
1210	HET	20	H2803	Geldanamycin	0.192	0.582	0.658
1210	HET	52	H2803	KIN001-013	1.157	1.13	1.36
1210	HET	64	H2803	KIN001-128	0.684	0.936	1.152
1210	HET	30	H2803	Sorafenib	0.58	1.124	0.993
1210	HET	45	H2803	Z-L-L-Norleucine-CHO	0.051	0.47	0.903
1210	HET	11	H2803	Taxol	0.664	0.873	1.019
1210	HET	88	H2803	MS275	0.131	0.589	0.975
846	HET	92	NCI-H2030	PP 242	0.176	0.511	1.111
1210	HET	37	H2803	KIN0001-023	0.671	0.889	1.058
1210	HET	35	H2803	KIN0001-017	0.227	0.454	0.727
1206	HET	125	H2722	BEZ235	0.4694	0.8331	1.1163
1210	HET	104	H2803	Bortezomib/Velcade	0.2371	1.0845	1.051
1210	HET	53	H2803	KIN001-019/CGP60474	0.054	0.388	1.425
1210	HET	17	H2803	Cyclopamine	0.545	0.887	0.866
1210	HET	40	H2803	TP-155	0.011	0.666	1.048
1210	HET	91	H2803	KIN-001-135	1.075	1.268	0.972
1210	HET	56	H2803	KIN001-112/WH-4-023	0.589	1.113	1.3389
1210	HET	93	H2803	KIN001-138	0.803	1.239	1.005
1210	HET	54	H2803	KIN001-021/CGP082996	0.621	1.199	1.316
1210	HET	41	H2803	S-Trityl-L-cysteine	0.449	0.586	0.736
1210	HET	9	H2803	MG-132	0.041	0.932	1.115
1210	HET	94	H2803	TXG 221	0.751	1.074	0.964
1210	HET	96	H2803	Pimozide	0.303	0.851	0.734
1212	HET	126	H2810	PFK222-666 (RAD001)	0.7334	0.9222	1.1173
1210	HET	68	H2803	BAY-1942	0.72	0.885	0.887
1210	HET	95	H2803	DM3189	0.114	1.168	0.891
1210	HET	29	H2803	AZ628	0.417	0.689	1.024
1210	HET	84	H2803	AZ960	0.318	0.964	1.02
1210	HET	97	H2803	AZD6244	0.7316	0.9254	1.055
1210	HET	63	H2803	KIN001-127	0.697	0.954	1.266
1210	HET	55	H2803	KIN001-111/A770041	0.782	1.143	1.311
1212	HET	57	H2810	KIN001-113/WH-4-025	0.268	0.494	0.919
1212	HET	109	H2810	Honokiol	0.109	0.7884	0.9965
1212	HET	91	H2810	KIN-001-135	0.91	1.02	1.055
1212	HET	54	H2810	KIN001-021/CGP082996	1.144	1.179	1.112
1212	HET	100	H2810	AZ83146	0.2919	1.0226	1.0021
1212	HET	111	H2810	Salubrinal	0.8678	0.8891	0.9228
1212	HET	66	H2810	HG-3-32-01	0.966	1.069	0.927
1212	HET	89	H2810	Parthenolide	0.872	1.033	0.961
1212	HET	110	H2810	Siliciclib/Roscovitine	0.6594	0.8464	0.8083
1212	HET	94	H2810	TXG 221	0.772	0.947	0.989
1212	HET	84	H2810	AZ960	0.786	0.951	1.016
1212	HET	52	H2810	KIN001-013	1.228	1.144	1.065
1212	HET	98	H2810	AZD1152	0.957	0.9697	0.9785
1212	HET	106	H2810	XMD8-85	0.8584	0.9968	1.0016
1212	HET	56	H2810	KIN001-112/WH-4-023	0.577	1.244	1.128
1212	HET	104	H2810	Bortezomib/Velcade	0.1773	1.1088	1.0226
886	HET	65	EBC-1	KIN001-130	0.585	0.849	1.133
1212	HET	96	H2810	Pimozide	0.933	1.058	0.945
1212	HET	55	H2810	KIN001-111/A770041	0.773	1.065	1.08
1212	HET	63	H2810	KIN001-127	0.773	1.067	0.985
1212	HET	73	H2810	MKC-1	0.404	0.573	1.03
1212	HET	64	H2810	KIN001-128	0.908	1.076	0.991
787	HET	92	SBC-3	PP 242	0.089	0.954	1.134
1212	HET	95	H2810	DM3189	0.79	0.985	1.007
1212	HET	59	H2810	KIN001-123/WZ-1-84	1.04	1.097	0.948
1212	HET	119	H2810	Lapatinib	1.1277	1.1469	1.2673
1212	HET	93	H2810	KIN001-138	0.689	0.825	0.926
1212	HET	99	H2810	AZD6474/Zactema	0.1095	0.9884	0.9965
787	HET	65	SBC-3	KIN001-130	0.212	0.993	1.139
1212	HET	60	H2810	KIN001-124/NPK33-1-98-1 (BI-2356)	0.464	0.613	0.831
835	HET	125	NCI-H2405	BEZ235	0.4547	1.0513	1.1408
1212	HET	71	H2810	Primethamine	0.83	0.919	1.01
874	HET	125	RERF-LC-Sq1	BEZ235	0.4163	0.9464	1.1452
1212	HET	97	H2810	AZD6244	0.4523	1.0031	1.0096
1212	HET	86	H2810	KIN001-139	0.044	0.909	1.022
1212	HET	68	H2810	BAY-1942	0.88	0.991	1.01
1212	HET	62	H2810	KIN001-126	0.317	0.853	0.96
1212	HET	87	H2810	KIN001-134	0.354	0.588	0.974
1212	HET	51	H2810	KIN001-005/BMS354825/Dasatinib	0.243	0.605	0.692
1212	HET	105	H2810	MLN4924	0.8238	1.3585	1.0929
1212	HET	80	H2810	MRK 003	0.248	0.7346	1.0229
1212	HET	88	H2810	MS275	0.221	0.606	0.829
1212	HET	53	H2810	KIN001-019/CGP60474	0.087	0.776	1.144
1247	HET	36	NCI-H2291	KIN0001-022	1.001	1.003	1.124
1247	HET	53	NCI-H2291	KIN001-019/CGP60474	0.305	0.862	1.172
1247	HET	19	NCI-H2291	Go 6976	0.549	0.763	0.932
1247	HET	105	NCI-H2291	MLN4924	0.6101	0.7193	0.7732
1247	HET	41	NCI-H2291	S-Trityl-L-cysteine	0.687	0.971	1.021
1247	HET	29	NCI-H2291	AZ628	0.229	0.458	0.712
1247	HET	89	NCI-H2291	Parthenolide	0.101	1.058	1.211
1247	HET	110	NCI-H2291	Siliciclib/Roscovitine	0.6093	0.8226	0.8629
874	HET	65	RERF-LC-Sq1	KIN001-130	0.268	0.911	1.151
1247	HET	87	NCI-H2291	KIN001-134	0.755	0.868	1.201
1247	HET	55	NCI-H2291	KIN001-111/A770041	0.719	0.862	1.179
1247	HET	9	NCI-H2291	MG-132	0.192	1.066	1.078
1247	HET	80	NCI-H2291	MRK 003	0.8432	0.9136	1.0403
1247	HET	73	NCI-H2291	MKC-1	1.028	1.14	1.344
1247	HET	5	NCI-H2291	Sutent	0.661	0.891	0.984
1247	HET	32	NCI-H2291	KIN0001-006	0.94	0.937	0.961
1247	HET	17	NCI-H2291	Cyclopamine	0.775	0.93	1.023
1247	HET	111	NCI-H2291	Salubrinal	0.455	0.8039	0.7592
1247	HET	95	NCI-H2291	DM3189	1.17	1.324	1.017
1247	HET	104	NCI-H2291	Bortezomib/Velcade	0.0917	0.6233	0.9655
1247	HET	59	NCI-H2291	KIN001-123/WZ-1-84	0.915	1.007	0.99
1247	HET	52	NCI-H2291	KIN001-013	1.073	1.053	1.173
1247	HET	11	NCI-H2291	Taxol	0.756	0.893	1.014
799	HET	65	NCI-H661	KIN001-130	0.332	0.596	1.168
1247	HET	14	NCI-H2291	HKI-272	0.583	0.773	0.888
1247	HET	40	NCI-H2291	TP-155	0.023	0.937	1.031
1247	HET	88	NCI-H2291	MS275	NA	0.428	0.824
1247	HET	63	NCI-H2291	KIN001-127	0.874	0.971	1.088
1247	HET	66	NCI-H2291	HG-3-32-01	1.06	1.097	1.007
863	HET	65	COR-L 23/CPR	KIN001-130	0.493	1.088	1.254
1247	HET	30	NCI-H2291	Sorafenib	0.824	1.165	1.155
1247	HET	84	NCI-H2291	AZ960	0.597	0.962	1.071
1247	HET	37	NCI-H2291	KIN0001-023	0.885	1.053	1.12
822	HET	65	NCI-H1869	KIN001-130	0.353	0.935	1.266
1247	HET	1	NCI-H2291	Tarceva	0.829	0.895	0.927
1247	HET	62	NCI-H2291	KIN001-126	0.691	0.922	0.985
1247	HET	97	NCI-H2291	AZD6244	0.2448	0.4951	0.5645
1247	HET	86	NCI-H2291	KIN001-139	0.242	0.966	1.162
1247	HET	94	NCI-H2291	TXG 221	0.721	0.972	1.025
1247	HET	38	NCI-H2291	KIN0001-045	0.808	0.997	1.037
1247	HET	54	NCI-H2291	KIN001-021/CGP082996	0.978	0.91	1.068
1247	HET	98	NCI-H2291	AZD1152	0.8608	0.8265	0.8214
1247	HET	45	NCI-H2291	Z-L-L-Norleucine-CHO	0.072	0.945	0.986
1247	HET	51	NCI-H2291	KIN001-005/BMS354825/Dasatinib	0.341	0.847	1.018
1247	HET	100	NCI-H2291	AZ83146	0.597	0.7892	0.864
1247	HET	35	NCI-H2291	KIN0001-017	0.668	0.902	1.019
1247	HET	68	NCI-H2291	BAY-1942	0.791	0.874	0.961
1247	HET	91	NCI-H2291	KIN-001-135	1.155	1.07	1.071
1247	HET	60	NCI-H2291	KIN001-124/NPK33-1-98-1 (BI-2356)	0.653	0.84	1.183
1247	HET	34	NCI-H2291	KIN0001-014	0.999	0.959	1.064
1247	HET	20	NCI-H2291	Geldanamycin	0.428	0.776	1.005
1247	HET	64	NCI-H2291	KIN001-128	0.773	0.955	0.932
1247	HET	127	NCI-H2291	KIN001-155	0.647	1.497	1.385
1247	HET	109	NCI-H2291	Honokiol	0.0299	0.5893	0.7203
1210	HET	65	H2803	KIN001-130	0.158	0.803	1.289
1247	HET	119	NCI-H2291	Lapatinib	0.7641	0.7928	0.7581
1247	HET	6	NCI-H2291	PHA665752	1.021	0.957	1.036
1247	HET	71	NCI-H2291	Primethamine	0.974	1.039	1.167
1247	HET	57	NCI-H2291	KIN001-113/WH-4-025	0.784	1.005	1.214
1247	HET	56	NCI-H2291	KIN001-112/WH-4-023	0.937	0.98	1.149
1247	HET	106	NCI-H2291	XMD8-85	1.168	0.8054	0.7009
1247	HET	96	NCI-H2291	Pimozide	0.621	1.201	1.219
1247	HET	99	NCI-H2291	AZD6474/Zactema	0.3005	0.8013	0.7961
678	SNP	99	UMC-11	AZD6474/Zactema	0.242	1.134	1.2528
678	SNP	4	UMC-11	LY294002	0.61	0.718	0.796
678	SNP	6	UMC-11	PHA665752	0.742	0.894	1.016
678	SNP	32	UMC-11	KIN0001-006	0.794	0.756	0.966
678	SNP	71	UMC-11	Primethamine	0.873	1.118	0.955
678	SNP	14	UMC-11	HKI-272	0.832	0.89	0.959
678	SNP	64	UMC-11	KIN001-128	1.067	1.188	1.149
678	SNP	24	UMC-11	U-0126	0.814	1	1.048
678	SNP	61	UMC-11	KIN001-125/AMG702	1.114	0.977	1.165
678	SNP	42	UMC-11	Y27632	0.978	1.045	0.987
678	SNP	68	UMC-11	BAY-1942	0.957	1.079	1.017
678	SNP	95	UMC-11	DM3189	0.829	1.237	1.199
678	SNP	104	UMC-11	Bortezomib/Velcade	0.2295	1.2179	0.9984
678	SNP	27	UMC-11	JAK Inhibitor I	0.75	0.984	0.951
678	SNP	43	UMC-11	Go 6983	0.991	0.98	0.986
678	SNP	45	UMC-11	Z-L-L-Norleucine-CHO	0.98	1.054	1.037
678	SNP	19	UMC-11	Go 6976	0.907	0.773	0.69
678	SNP	80	UMC-11	MRK 003	0.8253	0.9665	0.9749
678	SNP	87	UMC-11	KIN001-134	0.38	0.371	1.055
678	SNP	60	UMC-11	KIN001-124/NPK33-1-98-1 (BI-2356)	0.423	0.504	1.237
678	SNP	7	UMC-11	AG 1024	0.713	0.663	1.042
678	SNP	88	UMC-11	MS275	0.036	0.565	1.206
678	SNP	44	UMC-11	PD 98059	0.97	0.994	0.994
678	SNP	97	UMC-11	AZD6244	1.3455	1.2532	1.1267
678	SNP	89	UMC-11	Parthenolide	0.982	1.163	1.251
678	SNP	98	UMC-11	AZD1152	0.6956	0.5225	0.5466
678	SNP	91	UMC-11	KIN-001-135	1.109	1.052	1.107
678	SNP	35	UMC-11	KIN0001-017	0.693	0.993	0.97
678	SNP	12	UMC-11	Cisplatin	0.953	1.051	0.977
678	SNP	9	UMC-11	MG-132	0.312	0.765	0.846
678	SNP	11	UMC-11	Taxol	0.338	0.632	0.875
678	SNP	109	UMC-11	Honokiol	0.0214	0.5788	1.0289
678	SNP	15	UMC-11	AG-957	0.832	0.988	1.013
678	SNP	56	UMC-11	KIN001-112/WH-4-023	0.64	0.718	0.874
678	SNP	23	UMC-11	KN-93	0.11	0.805	1.041
678	SNP	13	UMC-11	CL-387,785	0.788	1.085	0.895
678	SNP	100	UMC-11	AZ83146	0.3502	0.8186	1.3385
678	SNP	38	UMC-11	KIN0001-045	0.747	0.997	1.033
678	SNP	20	UMC-11	Geldanamycin	0.504	0.858	0.94
678	SNP	40	UMC-11	TP-155	0.211	0.488	1.013
678	SNP	37	UMC-11	KIN0001-023	0.823	0.97	1.017
678	SNP	34	UMC-11	KIN0001-014	1.023	1.022	0.986
678	SNP	29	UMC-11	AZ628	0.962	0.989	1.073
678	SNP	53	UMC-11	KIN001-019/CGP60474	-0.053	0.144	0.669
678	SNP	110	UMC-11	Siliciclib/Roscovitine	0.4912	0.9986	0.7131
678	SNP	22	UMC-11	LM-1685	0.834	1.128	0.891
678	SNP	93	UMC-11	KIN001-138	0.603	0.864	1.105
678	SNP	106	UMC-11	XMD8-85	0.9164	1.412	0.9191
1200	SNP	83	H2373	JW-7-52-1	0.119	0.217	0.38
1215	SNP	83	H290	JW-7-52-1	0.116	0.129	0.401
678	SNP	63	UMC-11	KIN001-127	1.191	0.997	1.164
678	SNP	5	UMC-11	Sutent	0.546	0.902	0.878
678	SNP	8	UMC-11	SU6656	0.898	0.956	0.967
1200	SNP	65	H2373	KIN001-130	0.359	0.406	0.424
678	SNP	51	UMC-11	KIN001-005/BMS354825/Dasatinib	0.242	0.302	0.773
678	SNP	86	UMC-11	KIN001-139	0.039	0.604	1.105
678	SNP	18	UMC-11	P38 MAPK Inhibitor	0.949	0.883	0.802
678	SNP	28	UMC-11	MLN8054	0.759	0.743	0.945
678	SNP	52	UMC-11	KIN001-013	0.727	0.747	0.523
678	SNP	119	UMC-11	Lapatinib	0.711	0.9987	0.9256
678	SNP	54	UMC-11	KIN001-021/CGP082996	0.806	0.988	0.87
678	SNP	33	UMC-11	KIN0001-012	0.961	1.019	1.05
678	SNP	66	UMC-11	HG-3-32-01	1.003	0.893	1.224
678	SNP	36	UMC-11	KIN0001-022	0.96	1.027	1.009
678	SNP	59	UMC-11	KIN001-123/WZ-1-84	1.221	1.048	1.3369
678	SNP	41	UMC-11	S-Trityl-L-cysteine	0.454	0.815	0.941
678	SNP	126	UMC-11	PFK222-666 (RAD001)	0.2676	0.2761	0.4432
678	SNP	31	UMC-11	KIN0001-001	0.863	1.048	1.068
678	SNP	55	UMC-11	KIN001-111/A770041	0.515	0.865	0.519
678	SNP	17	UMC-11	Cyclopamine	0.673	0.634	0.775
678	SNP	105	UMC-11	MLN4924	0.4472	1.2242	1.0084
678	SNP	30	UMC-11	Sorafenib	0.925	1.037	1.038
678	SNP	57	UMC-11	KIN001-113/WH-4-025	1.069	0.886	0.957
678	SNP	73	UMC-11	MKC-1	0.409	0.965	1.079
678	SNP	84	UMC-11	AZ960	0.472	0.958	1.136
678	SNP	16	UMC-11	JAK2 Inhibitor II	0.927	0.914	0.939
678	SNP	96	UMC-11	Pimozide	0.11	1.176	1.261
678	SNP	111	UMC-11	Salubrinal	0.1842	0.9045	1.1124
678	SNP	10	UMC-11	L-685,458	0.95	1.018	0.684
678	SNP	1	UMC-11	Tarceva	0.723	0.685	0.965
678	SNP	62	UMC-11	KIN001-126	1.196	1.197	1.049
678	SNP	2	UMC-11	HCQ	0.8	0.867	0.813
678	SNP	94	UMC-11	TXG 221	1.015	1.094	1.117
759	SNP	83	MSTO-211H	JW-7-52-1	0.037	0.143	0.453
759	SNP	67	MSTO-211H	GST-MDA-7	0.01	0.694	1.027
759	SNP	55	MSTO-211H	KIN001-111/A770041	1.09	1.125	1.186
771	SNP	83	Lu-135	JW-7-52-1	0.013	0.105	0.52
759	SNP	53	MSTO-211H	KIN001-019/CGP60474	0.064	1.039	1.03
759	SNP	8	MSTO-211H	SU6656	1.052	1.029	0.951
759	SNP	54	MSTO-211H	KIN001-021/CGP082996	0.815	1.069	1.17
759	SNP	30	MSTO-211H	Sorafenib	1.187	0.971	1.266
759	SNP	63	MSTO-211H	KIN001-127	0.933	1.007	1.228
759	SNP	38	MSTO-211H	KIN0001-045	0.85	0.775	0.959
759	SNP	73	MSTO-211H	MKC-1	0.19	0.437	1.116
759	SNP	91	MSTO-211H	KIN-001-135	1.814	0.83	1.464
759	SNP	18	MSTO-211H	P38 MAPK Inhibitor	0.926	0.936	0.927
759	SNP	16	MSTO-211H	JAK2 Inhibitor II	0.954	0.994	1.005
759	SNP	80	MSTO-211H	MRK 003	0.4159	0.9876	0.947
759	SNP	68	MSTO-211H	BAY-1942	1.032	1.165	1.134
759	SNP	14	MSTO-211H	HKI-272	1.039	0.999	1.018
759	SNP	34	MSTO-211H	KIN0001-014	1.186	1.196	1.109
759	SNP	17	MSTO-211H	Cyclopamine	0.904	0.85	0.983
759	SNP	95	MSTO-211H	DM3189	0.62	1.06	0.871
759	SNP	10	MSTO-211H	L-685,458	0.981	0.982	0.913
759	SNP	94	MSTO-211H	TXG 221	1.056	0.86	1.336
759	SNP	5	MSTO-211H	Sutent	0.88	0.953	0.976
759	SNP	64	MSTO-211H	KIN001-128	0.863	0.989	1.235
759	SNP	33	MSTO-211H	KIN0001-012	1.104	1.111	1.118
759	SNP	19	MSTO-211H	Go 6976	1.035	1.045	1.009
759	SNP	42	MSTO-211H	Y27632	1.095	1.126	1.145
759	SNP	58	MSTO-211H	KIN001-122/JW-2-8-1	1.049	1.117	1.049
759	SNP	71	MSTO-211H	Primethamine	0.041	0.425	1.2
759	SNP	51	MSTO-211H	KIN001-005/BMS354825/Dasatinib	0.555	0.89	0.921
759	SNP	84	MSTO-211H	AZ960	0.022	0.79	0.933
759	SNP	22	MSTO-211H	LM-1685	0.999	0.981	0.969
759	SNP	1	MSTO-211H	Tarceva	0.881	0.833	0.924
759	SNP	32	MSTO-211H	KIN0001-006	0.612	0.772	1.219
759	SNP	89	MSTO-211H	Parthenolide	0.263	0.999	1.172
759	SNP	88	MSTO-211H	MS275	0.05	0.323	1.111
759	SNP	59	MSTO-211H	KIN001-123/WZ-1-84	1.043	0.999	1.009
759	SNP	35	MSTO-211H	KIN0001-017	0.329	1.001	1.062
759	SNP	31	MSTO-211H	KIN0001-001	0.594	1.364	1.178
759	SNP	56	MSTO-211H	KIN001-112/WH-4-023	0.898	1.047	1.183
759	SNP	15	MSTO-211H	AG-957	0.988	0.92	1.007
759	SNP	93	MSTO-211H	KIN001-138	0.707	2.414	1.138
1201	SNP	65	H2461	KIN001-130	0.317	0.385	0.55
759	SNP	36	MSTO-211H	KIN0001-022	0.443	0.647	0.889
759	SNP	52	MSTO-211H	KIN001-013	1.214	1.149	1.114
759	SNP	20	MSTO-211H	Geldanamycin	1.007	1.044	0.905
759	SNP	45	MSTO-211H	Z-L-L-Norleucine-CHO	0.132	0.936	0.881
759	SNP	57	MSTO-211H	KIN001-113/WH-4-025	0.305	0.471	1.083
759	SNP	6	MSTO-211H	PHA665752	1.027	1.008	0.93
759	SNP	2	MSTO-211H	HCQ	1.036	0.944	0.885
759	SNP	40	MSTO-211H	TP-155	0.145	0.851	0.906
759	SNP	9	MSTO-211H	MG-132	0.731	0.89	0.846
759	SNP	12	MSTO-211H	Cisplatin	1.072	0.998	0.926
786	SNP	126	SBC-5	PFK222-666 (RAD001)	0.4373	0.5667	0.5673
759	SNP	60	MSTO-211H	KIN001-124/NPK33-1-98-1 (BI-2356)	0.295	0.588	1.031
759	SNP	29	MSTO-211H	AZ628	0.84	1.001	0.992
759	SNP	66	MSTO-211H	HG-3-32-01	1.005	1.086	1.085
759	SNP	86	MSTO-211H	KIN001-139	0.006	0.149	0.825
759	SNP	24	MSTO-211H	U-0126	0.905	0.967	1.03
759	SNP	23	MSTO-211H	KN-93	0.961	0.897	1.012
759	SNP	27	MSTO-211H	JAK Inhibitor I	0.667	0.958	1.095
759	SNP	44	MSTO-211H	PD 98059	0.847	0.844	0.88
759	SNP	28	MSTO-211H	MLN8054	0.586	0.773	1.093
759	SNP	61	MSTO-211H	KIN001-125/AMG702	0.864	0.864	1.131
759	SNP	62	MSTO-211H	KIN001-126	0.604	0.835	1.15
759	SNP	96	MSTO-211H	Pimozide	0.034	0.748	0.838
759	SNP	11	MSTO-211H	Taxol	0.768	1.019	0.923
759	SNP	7	MSTO-211H	AG 1024	0.936	0.929	0.99
759	SNP	41	MSTO-211H	S-Trityl-L-cysteine	0.533	1.071	1.096
759	SNP	4	MSTO-211H	LY294002	0.893	1.048	0.952
759	SNP	13	MSTO-211H	CL-387,785	0.991	1.005	0.978
759	SNP	87	MSTO-211H	KIN001-134	0.052	0.15	1.004
759	SNP	37	MSTO-211H	KIN0001-023	0.755	0.972	0.873
771	SNP	71	Lu-135	Primethamine	0.205	0.409	1.19
771	SNP	10	Lu-135	L-685,458	1.053	1.061	0.994
759	SNP	92	MSTO-211H	PP 242	0.058	0.169	0.575
771	SNP	36	Lu-135	KIN0001-022	1.05	1.056	1.167
771	SNP	104	Lu-135	Bortezomib/Velcade	0.0388	1.0976	1.3319
771	SNP	66	Lu-135	HG-3-32-01	0.678	0.959	0.904
771	SNP	109	Lu-135	Honokiol	0.0108	0.4135	1.0443
771	SNP	16	Lu-135	JAK2 Inhibitor II	1.012	0.997	0.947
771	SNP	60	Lu-135	KIN001-124/NPK33-1-98-1 (BI-2356)	0.151	0.193	1.155
771	SNP	13	Lu-135	CL-387,785	0.809	0.965	0.965
771	SNP	87	Lu-135	KIN001-134	0.006	0.009	0.947
771	SNP	23	Lu-135	KN-93	0.966	1.109	0.983
771	SNP	30	Lu-135	Sorafenib	0.568	1.067	1.148
771	SNP	58	Lu-135	KIN001-122/JW-2-8-1	0.832	1.051	0.945
771	SNP	4	Lu-135	LY294002	0.935	0.995	1.095
771	SNP	119	Lu-135	Lapatinib	0.684	1.0672	0.9165
771	SNP	22	Lu-135	LM-1685	1.009	0.943	1.051
771	SNP	63	Lu-135	KIN001-127	0.936	1.005	1.118
771	SNP	68	Lu-135	BAY-1942	1.03	1.121	1.201
771	SNP	7	Lu-135	AG 1024	0.979	1.04	1.041
771	SNP	38	Lu-135	KIN0001-045	0.958	1.062	1.083
771	SNP	80	Lu-135	MRK 003	0.9527	1.0764	1.0148
771	SNP	62	Lu-135	KIN001-126	0.259	0.899	1.117
771	SNP	55	Lu-135	KIN001-111/A770041	0.669	0.764	1.084
771	SNP	12	Lu-135	Cisplatin	0.939	0.905	0.951
771	SNP	86	Lu-135	KIN001-139	0.221	0.948	1.054
771	SNP	95	Lu-135	DM3189	0.041	0.944	0.951
771	SNP	105	Lu-135	MLN4924	0.1924	1.0265	1.2286
771	SNP	17	Lu-135	Cyclopamine	1.024	1.162	1.083
771	SNP	52	Lu-135	KIN001-013	0.969	0.896	1.173
771	SNP	9	Lu-135	MG-132	0.225	1.063	1.185
771	SNP	40	Lu-135	TP-155	0.082	1.041	1.074
771	SNP	24	Lu-135	U-0126	0.738	1.017	0.985
771	SNP	64	Lu-135	KIN001-128	0.91	0.987	1.058
771	SNP	111	Lu-135	Salubrinal	0.2303	1.1155	1.154
771	SNP	45	Lu-135	Z-L-L-Norleucine-CHO	0.29	1.024	1.098
771	SNP	98	Lu-135	AZD1152	0.2406	0.2194	0.2247
771	SNP	91	Lu-135	KIN-001-135	0.996	1.015	1.065
771	SNP	19	Lu-135	Go 6976	0.951	1.011	1.048
771	SNP	14	Lu-135	HKI-272	0.867	0.996	1.091
771	SNP	106	Lu-135	XMD8-85	0.6483	1.0236	1.1841
771	SNP	41	Lu-135	S-Trityl-L-cysteine	0.291	1.03	1.033
771	SNP	99	Lu-135	AZD6474/Zactema	0.0139	0.8013	0.9623
771	SNP	6	Lu-135	PHA665752	0.928	0.986	1.091
771	SNP	97	Lu-135	AZD6244	0.298	0.333	0.4607
771	SNP	56	Lu-135	KIN001-112/WH-4-023	0.715	0.77	1.005
857	SNP	83	HCC-44	JW-7-52-1	0.138	0.233	0.592
771	SNP	35	Lu-135	KIN0001-017	0.473	1.059	1.185
771	SNP	20	Lu-135	Geldanamycin	0.503	0.945	1.114
771	SNP	1	Lu-135	Tarceva	1.021	1.014	1.091
771	SNP	15	Lu-135	AG-957	1.037	1.027	0.93
819	SNP	126	NCI-H1734	PFK222-666 (RAD001)	0.452	0.4314	0.5995
771	SNP	89	Lu-135	Parthenolide	0.02	0.79	0.857
771	SNP	34	Lu-135	KIN0001-014	1.014	1.108	1.087
771	SNP	73	Lu-135	MKC-1	0.139	0.689	1.16
771	SNP	100	Lu-135	AZ83146	0.0245	0.3353	1.0114
771	SNP	53	Lu-135	KIN001-019/CGP60474	0.081	0.789	1.092
771	SNP	18	Lu-135	P38 MAPK Inhibitor	0.907	0.981	1.022
771	SNP	11	Lu-135	Taxol	0.255	0.627	1.045
771	SNP	93	Lu-135	KIN001-138	0.107	0.784	0.957
771	SNP	54	Lu-135	KIN001-021/CGP082996	0.699	0.781	1.123
771	SNP	37	Lu-135	KIN0001-023	0.713	1.144	1.16
771	SNP	94	Lu-135	TXG 221	0.642	0.957	0.934
771	SNP	61	Lu-135	KIN001-125/AMG702	0.939	1.027	1.012
771	SNP	84	Lu-135	AZ960	0.07	0.861	1.092
771	SNP	32	Lu-135	KIN0001-006	0.6	0.577	1.06
771	SNP	8	Lu-135	SU6656	1.066	0.983	0.968
771	SNP	59	Lu-135	KIN001-123/WZ-1-84	1.066	1.108	0.998
771	SNP	67	Lu-135	GST-MDA-7	0.029	0.818	1.018
771	SNP	51	Lu-135	KIN001-005/BMS354825/Dasatinib	0.612	0.708	0.781
771	SNP	88	Lu-135	MS275	NA	0.138	0.89
771	SNP	29	Lu-135	AZ628	0.872	1.012	1.044
771	SNP	110	Lu-135	Siliciclib/Roscovitine	0.2812	0.8542	0.989
771	SNP	96	Lu-135	Pimozide	0.002	0.825	0.816
1215	SNP	126	H290	PFK222-666 (RAD001)	0.3856	0.5011	0.6304
771	SNP	57	Lu-135	KIN001-113/WH-4-025	0.631	0.722	1.035
870	SNP	83	RERF-LC-KJ	JW-7-52-1	0.27	0.333	0.685
771	SNP	5	Lu-135	Sutent	0.708	1.055	1.106
771	SNP	2	Lu-135	HCQ	1.07	1.068	1.016
784	SNP	40	RERF-LC-MA	TP-155	-0.032	0.178	0.443
784	SNP	94	RERF-LC-MA	TXG 221	0.675	0.924	0.981
784	SNP	14	RERF-LC-MA	HKI-272	0.082	0.419	0.435
784	SNP	30	RERF-LC-MA	Sorafenib	0.767	0.731	0.623
784	SNP	52	RERF-LC-MA	KIN001-013	1.302	1.342	1.167
784	SNP	68	RERF-LC-MA	BAY-1942	0.858	0.868	0.933
784	SNP	59	RERF-LC-MA	KIN001-123/WZ-1-84	0.963	1.1	1.172
784	SNP	41	RERF-LC-MA	S-Trityl-L-cysteine	0.036	0.582	1.055
784	SNP	29	RERF-LC-MA	AZ628	0.238	0.444	0.495
844	SNP	83	SW 1573	JW-7-52-1	0.123	0.19	0.686
784	SNP	17	RERF-LC-MA	Cyclopamine	0.575	0.583	0.858
784	SNP	86	RERF-LC-MA	KIN001-139	0.095	0.869	1.007
784	SNP	1	RERF-LC-MA	Tarceva	0.468	0.486	0.449
784	SNP	99	RERF-LC-MA	AZD6474/Zactema	0.1465	0.7182	0.8879
784	SNP	95	RERF-LC-MA	DM3189	0.018	0.99	0.929
784	SNP	73	RERF-LC-MA	MKC-1	0.059	0.135	0.908
784	SNP	55	RERF-LC-MA	KIN001-111/A770041	0.436	1.12	1.312
784	SNP	100	RERF-LC-MA	AZ83146	0.2452	0.8786	0.9861
784	SNP	105	RERF-LC-MA	MLN4924	0.3943	0.9769	1.1297
784	SNP	45	RERF-LC-MA	Z-L-L-Norleucine-CHO	0.005	0.959	1.086
784	SNP	80	RERF-LC-MA	MRK 003	1.1627	1.053	1.1651
784	SNP	53	RERF-LC-MA	KIN001-019/CGP60474	0.108	0.18	1.228
784	SNP	51	RERF-LC-MA	KIN001-005/BMS354825/Dasatinib	0.134	0.532	1.164
784	SNP	19	RERF-LC-MA	Go 6976	0.037	0.084	0.446
784	SNP	84	RERF-LC-MA	AZ960	0.179	0.648	1.15
784	SNP	38	RERF-LC-MA	KIN0001-045	0.473	0.611	0.92
819	SNP	83	NCI-H1734	JW-7-52-1	0.169	0.211	0.694
771	SNP	126	Lu-135	PFK222-666 (RAD001)	0.4834	0.5357	0.7062
784	SNP	104	RERF-LC-MA	Bortezomib/Velcade	0.0691	0.9987	1.0726
784	SNP	54	RERF-LC-MA	KIN001-021/CGP082996	0.971	1.291	1.407
784	SNP	89	RERF-LC-MA	Parthenolide	0.002	0.868	1.09
784	SNP	97	RERF-LC-MA	AZD6244	0.1601	0.2871	0.5962
784	SNP	88	RERF-LC-MA	MS275	0.155	0.757	1.155
784	SNP	106	RERF-LC-MA	XMD8-85	0.571	0.9904	1.0634
784	SNP	20	RERF-LC-MA	Geldanamycin	0.069	0.073	0.974
784	SNP	35	RERF-LC-MA	KIN0001-017	0.099	0.561	0.735
784	SNP	98	RERF-LC-MA	AZD1152	0.6467	0.7286	0.7059
784	SNP	66	RERF-LC-MA	HG-3-32-01	1.01	1.031	0.96
784	SNP	11	RERF-LC-MA	Taxol	-0.006	0.021	0.574
784	SNP	119	RERF-LC-MA	Lapatinib	0.9017	0.9205	0.9674
784	SNP	32	RERF-LC-MA	KIN0001-006	0.346	0.259	0.503
784	SNP	64	RERF-LC-MA	KIN001-128	0.325	1.056	1.035
784	SNP	87	RERF-LC-MA	KIN001-134	0.049	0.053	1.116
784	SNP	91	RERF-LC-MA	KIN-001-135	1.124	1.164	1.173
784	SNP	62	RERF-LC-MA	KIN001-126	0.391	0.971	1.096
784	SNP	63	RERF-LC-MA	KIN001-127	0.976	1.157	1.102
784	SNP	71	RERF-LC-MA	Primethamine	0.844	0.946	0.862
784	SNP	34	RERF-LC-MA	KIN0001-014	0.784	0.845	0.851
784	SNP	57	RERF-LC-MA	KIN001-113/WH-4-025	0.769	1.157	1.432
784	SNP	111	RERF-LC-MA	Salubrinal	0.7241	1.0878	1.0121
784	SNP	96	RERF-LC-MA	Pimozide	0.092	0.931	0.822
784	SNP	83	RERF-LC-MA	JW-7-52-1	0.094	0.221	0.711
1201	SNP	83	H2461	JW-7-52-1	0.358	0.432	0.725
784	SNP	93	RERF-LC-MA	KIN001-138	0.451	0.919	0.909
784	SNP	109	RERF-LC-MA	Honokiol	0.0266	0.7934	0.9451
784	SNP	5	RERF-LC-MA	Sutent	0.127	0.536	0.511
784	SNP	110	RERF-LC-MA	Siliciclib/Roscovitine	0.5089	0.9796	0.9654
784	SNP	9	RERF-LC-MA	MG-132	0.037	0.583	0.539
784	SNP	60	RERF-LC-MA	KIN001-124/NPK33-1-98-1 (BI-2356)	0.103	0.143	0.995
784	SNP	56	RERF-LC-MA	KIN001-112/WH-4-023	0.737	1.165	1.285
784	SNP	37	RERF-LC-MA	KIN0001-023	0.796	0.747	0.794
784	SNP	6	RERF-LC-MA	PHA665752	0.469	0.591	0.554
784	SNP	36	RERF-LC-MA	KIN0001-022	0.862	0.695	1.033
786	SNP	33	SBC-5	KIN0001-012	0.979	1.017	0.94
786	SNP	59	SBC-5	KIN001-123/WZ-1-84	1.13	0.978	1.179
786	SNP	16	SBC-5	JAK2 Inhibitor II	1.097	1.083	1.034
786	SNP	11	SBC-5	Taxol	0.163	0.56	1.094
786	SNP	6	SBC-5	PHA665752	0.946	1.011	1.055
786	SNP	24	SBC-5	U-0126	0.903	1.057	1.18
786	SNP	58	SBC-5	KIN001-122/JW-2-8-1	0.959	0.93	0.96
786	SNP	38	SBC-5	KIN0001-045	0.899	0.949	0.95
786	SNP	106	SBC-5	XMD8-85	0.9883	1.3834	1.3755
786	SNP	105	SBC-5	MLN4924	0.2741	0.7292	1.27239
870	SNP	126	RERF-LC-KJ	PFK222-666 (RAD001)	0.5183	0.6722	0.731
786	SNP	28	SBC-5	MLN8054	0.678	0.735	0.938
786	SNP	98	SBC-5	AZD1152	0.3989	0.7006	0.7712
786	SNP	17	SBC-5	Cyclopamine	0.617	1.143	1.128
844	SNP	126	SW 1573	PFK222-666 (RAD001)	0.5233	0.6009	0.7445
786	SNP	40	SBC-5	TP-155	0.123	0.516	0.921
786	SNP	80	SBC-5	MRK 003	0.9096	0.9138	1.0348
786	SNP	99	SBC-5	AZD6474/Zactema	0.0318	1.3869	1.4151
786	SNP	54	SBC-5	KIN001-021/CGP082996	0.914	1.059	1.059
786	SNP	51	SBC-5	KIN001-005/BMS354825/Dasatinib	1.117	1.006	0.973
786	SNP	52	SBC-5	KIN001-013	1.024	1.095	1.051
786	SNP	34	SBC-5	KIN0001-014	0.912	1.018	0.986
786	SNP	104	SBC-5	Bortezomib/Velcade	0.0405	1.3269	1.3994
786	SNP	66	SBC-5	HG-3-32-01	0.917	1.005	0.996
786	SNP	41	SBC-5	S-Trityl-L-cysteine	0.269	0.934	0.946
786	SNP	32	SBC-5	KIN0001-006	0.66	0.78	0.856
786	SNP	71	SBC-5	Primethamine	0.563	0.917	1.168
786	SNP	68	SBC-5	BAY-1942	1.009	1.058	1.181
786	SNP	89	SBC-5	Parthenolide	-0.004	1.003	1.151
786	SNP	15	SBC-5	AG-957	1.079	1.11	0.973
786	SNP	93	SBC-5	KIN001-138	0.442	0.913	1.028
786	SNP	31	SBC-5	KIN0001-001	0.693	0.935	0.914
786	SNP	43	SBC-5	Go 6983	0.818	1.015	0.987
786	SNP	29	SBC-5	AZ628	0.681	0.894	0.936
786	SNP	30	SBC-5	Sorafenib	0.715	0.891	0.91
786	SNP	18	SBC-5	P38 MAPK Inhibitor	0.885	1.283	1.064
786	SNP	9	SBC-5	MG-132	0.193	1.22	1.198
1200	SNP	126	H2373	PFK222-666 (RAD001)	0.4053	0.5748	0.7668
786	SNP	12	SBC-5	Cisplatin	1.098	1.233	1.133
786	SNP	45	SBC-5	Z-L-L-Norleucine-CHO	0.302	0.955	0.912
786	SNP	22	SBC-5	LM-1685	1.027	1.057	1.121
786	SNP	64	SBC-5	KIN001-128	0.727	0.974	1.043
786	SNP	35	SBC-5	KIN0001-017	0.689	0.98	0.975
786	SNP	62	SBC-5	KIN001-126	0.934	0.95	1.069
786	SNP	84	SBC-5	AZ960	0.403	0.728	1.292
786	SNP	27	SBC-5	JAK Inhibitor I	0.848	0.947	0.945
786	SNP	111	SBC-5	Salubrinal	0.2462	1.2047	1.235
786	SNP	1	SBC-5	Tarceva	0.979	1.119	1.083
786	SNP	19	SBC-5	Go 6976	0.679	0.992	1.113
786	SNP	37	SBC-5	KIN0001-023	0.625	0.92	0.932
786	SNP	23	SBC-5	KN-93	0.455	1.046	1.005
786	SNP	55	SBC-5	KIN001-111/A770041	1.004	1.033	1.091
786	SNP	14	SBC-5	HKI-272	0.998	1.03	1.098
786	SNP	97	SBC-5	AZD6244	0.9478	1.2595	1.4572
786	SNP	10	SBC-5	L-685,458	1	1.204	1.1
786	SNP	86	SBC-5	KIN001-139	0.529	1.289	1.305
786	SNP	63	SBC-5	KIN001-127	0.855	0.947	1.151
786	SNP	8	SBC-5	SU6656	1.041	1.035	1.119
786	SNP	13	SBC-5	CL-387,785	0.465	1.166	1.118
786	SNP	109	SBC-5	Honokiol	0.0073	1.3016	1.5451
786	SNP	73	SBC-5	MKC-1	0.348	0.652	1.135
786	SNP	119	SBC-5	Lapatinib	0.6811	0.9411	0.9211
[truncated: 4,535 more rows]

## Sheet: Drug_list
Compound #	Name	Target	Concentration High	Concentration Med	Concentration Low
86	A443644	AKT	2.5	0.25	0.025
55	A770041	SRC	2	0.2	0.02
15	AG-957	ABL	0	0	0
7	AG1024	IGF1R	0	0	0
61	AMG706	VEGFR	2	0.2	0.02
29	AZ628	RAF	2	0.2	0.02
84	AZ960	JAK2	3	0.3	0.03
38	AZD0530/ Saracatinib	SRC	2	0.2	0.02
98	AZD1152	AURK	20	2	0.2
97	AZD6244	MEK 1/2	20	2	0.2
99	AZD6474/Zactima	VEGFR/EGFR/RET	20	2	0.2
68	BAY65-1942	IKKb	3	0.3	0.03
125	BEZ235	mTOR, PI3K	0.05	0.005	0.0005
60	BI-2536	PLK1,2,3	0.5	0.05	0.005
62	BMS-536924	IGF1R	2	0.2	0.02
104	Bortezomib	Proteasome	0.02	0.002	0.0002
53	CGP60474	CDK 1,2,5,7,9	0.5	0.05	0.005
12	Cisplatin	DNA	1	0.1	0.01
13	CL-387,785	ERBB2, EGFR	2	0.2	0.02
17	Cyclopamine	SMO	10	1	0.1
51	Dasatinib	ABL, SRC	0.5	0.05	0.005
95	DM3189	BMP1	1	0.1	0.01
20	Geldanamycin	HSP90	1	0.1	0.01
52	GNF2	ALB	2	0.2	0.02
19	Go 6976	PKC	10	1	0.1
43	Go-6983	PKC	5	0.5	0.05
127	GSK269962A	ROCK	2.5	0.25	0.025
91	GSK319347A	IKKe	2.5	0.25	0.025
67	GST-MDA-7	IL24	10	1	0.1
87	GW843682X	PLK1	0.5	0.05	0.005
66	HG-3-32-01	KIT, PDGFR	2	0.2	0.02
14	HKI-272	ERBB2, EGFR	2	0.2	0.02
109	Honokiol	Ras/PI3K signaling	10	1	0.1
34	Imatinib	ABL, KIT, PDGFR	2	0.2	0.02
27	JAK Inhib 1	JAK1,2,3	2	0.2	0.02
58	JW-2-8-1	AURK	2	0.2	0.02
31	KIN0001-001	SRC, ABL	2	0.2	0.02
63	KIN001-127	ITK	2	0.2	0.02
64	KIN001-128	RSK	2	0.2	0.02
23	KN-93	CAMK	10	1	0.1
10	L-685,458	g-secretase	10	1	0.1
119	Lapatinib	ERBB2, EGFR	5	0.5	0.05
22	LM-1685	COX2	10	1	0.1
4	LY294002	mTOR, PI3K	10	1	0.1
9	MG-132	Proteasome	1	0.1	0.01
105	MLN4924	NAE	2	0.2	0.02
28	MLN8054	AURK	2	0.2	0.02
80	MRK 003	g-secretase	5	0.5	0.05
88	MS275	HDAC	10	1	0.1
33	Myoseverin	TUBB	2	0.2	0.02
35	NVP-TAE684	ALK	2	0.2	0.02
89	Parthenolide	NF-kB	10	1	0.1
36	PD-173074	FGFR family	2	0.2	0.02
44	PD98059	MEK1/2	5	0.5	0.05
37	PF02341066	ALK, MET	2	0.2	0.02
6	PHA665752	MET	1	0.1	0.01
96	Pimozide	STAT3	10	1	0.1
92	PP 242	mTOR	5	0.5	0.05
71	Pyrimethamine	STAT3, MATE1/2, DHFR	20	2	0.2
126	RAD001	mTOR	0.1	0.01	0.001
73	Ro 31-7453	TUBB	2	0.2	0.02
93	ROCK inhibitor 1	ROCK	2.5	0.25	0.025
41	S-Trityl-L-cysteine	Eg5	5	0.5	0.05
111	Salubrinal	GADD34-PP1C	15	1.5	0.15
110	Seliciclib	CDK	15	1.5	0.15
30	Sorafenib	KIT, FLT3, RAF	2	0.2	0.02
8	SU6656	SRC	10	1	0.1
5	Sunitinib	VEGFR	10	1	0.1
1	Tarceva, Erlotinib	EGFR	2	0.2	0.02
94	TGX 221	PI3Kb	5	0.5	0.05
83	Torin	mTOR	2.5	0.25	0.025
40	TP-155	NF-kB	1	0.1	0.01
24	UO-126	MEK1/2	10	1	0.1
32	VX680	AURK, FLT3	2	0.2	0.02
57	WH-4-025	SRC	2	0.2	0.02
59	WZ-1-84	BMX	2	0.2	0.02
100	XAV939	TTK (Mitosis)	20	2	0.2
106	XMD8-85	ERK5	5	0.5	0.05
42	Y27632	ROCK	5	0.5	0.05
45	Z-L-L-Norleucine-CHO	g-secretase	5	0.5	0.05
2	HCQ	Lyzosome	20	2	0.2
11	Taxol	TUBB	0.1	0.01	0.001
16	JAK2 Inhib2	JAK	10	1	0.1
18	SB203580	p38MAPK	10	1	0.1
49	#N/A	#N/A	10	1	0.1
54	CGP082996	CDK4	2	0.2	0.02
56	WH-4-023	SRC	2	0.2	0.02
65	JW-5-8-1	mTOR, PI3K	0.5	0.05	0.005

## Sheet: Fisher_test_All_Conc
comp	conc	Genotype	0.1	0.2	0.3	0.4	0.5	0.6	0.7	0.8	nonGenotypeAvg	genotypeAvg	sampleSize	nonGenotypeSize	genotypeSize	Direction	effect	P	"LOGP"	Signif
13	High	SNP	1	1	0.327617	0.257571	0.068745	0.00359563	0.0172811	0.0486866	0.47637	0.695333	55	46	9	1.45965	-4.59651	0.00359563	8.11954	65.9269
90	Med	SNP	0.151163	0.00601799	0.0455163	0.199514	0.237706	0.235457	0.528879	1	0.593945	0.461692	86	73	13	0.777331	2.22669	0.00601799	7.3765	54.4128
13	Med	SNP	1	1	1	1	1	0.574442	0.180908	0.00938347	0.810804	0.979556	55	46	9	1.20813	-2.08128	0.00824913	6.92154	47.9078
95	High	SNP	0.0088084	0.0677114	0.336649	0.362782	0.363566	0.765565	0.762309	0.449717	0.537795	0.378615	86	73	13	0.704015	2.95985	0.0088084	6.8269	46.6066
53	Low	SNP	0.151163	0.151163	0.151163	0.392261	0.162417	0.162417	0.00892938	0.0266424	1.015	0.884077	86	73	13	0.871012	1.28988	0.00892938	6.80722	46.3383
85	Med	SNP	0.281014	0.170424	0.054941	0.0525527	0.0523131	0.0139018	0.221953	0.0723745	0.609767	0.856462	86	73	13	1.40457	-4.04572	0.0110818	6.49566	42.1936
92	Med	SNP	1	0.487449	0.284906	0.13406	0.0369837	0.0261409	0.114749	1	0.554	0.427385	86	73	13	0.771452	2.28548	0.0138843	6.17041	38.0739
53	Med	SNP	0.280985	0.0162628	0.0332803	0.170023	0.336649	0.356655	0.548841	0.764247	0.695288	0.568077	86	73	13	0.817039	1.82961	0.0162628	5.94228	35.3107
88	Med	SNP	1	0.0584327	0.0162628	0.0332803	0.170023	1	1	1	0.63937	0.573769	86	73	13	0.897398	1.02602	0.0162628	5.94228	35.3107
92	High	SNP	0.0252514	0.0314775	0.114857	0.584681	1	1	1	1	0.216986	0.118692	86	73	13	0.547004	4.52996	0.0173313	5.85048	34.2281
103	Med	SNP	1	1	1	0.142857	0.0189329	0.0193947	0.386663	0.510461	0.871058	0.8019	84	72	12	0.920604	0.793958	0.0189329	5.72296	32.7523
98	Med	SNP	1	0.546789	0.0834277	0.441907	1	1	0.362917	0.0306409	0.660193	0.562825	84	72	12	0.852516	1.47484	0.0191176	5.70895	32.5922
87	High	SNP	0.290674	0.0289057	0.552688	0.062963	0.20232	0.203165	0.588142	1	0.311329	0.167231	86	73	13	0.537152	4.62848	0.0201141	5.63565	31.7606
110	High	SNP	0.0938386	0.143896	0.0202964	0.479822	1	0.546836	0.680633	1	0.537649	0.453617	85	73	12	0.843704	1.56296	0.0202964	5.62263	31.614
125	Med	SNP	1	1	1	1	1	1	0.0211818	0.0712346	0.895318	0.792117	84	72	12	0.884732	1.15268	0.0211818	5.56103	30.9251
62	Low	SNP	1	1	1	1	1	1	0.151163	0.0213406	1.04914	1.02285	86	73	13	0.974941	0.250595	0.0213406	5.55025	30.8053
65	Low	SNP	1	1	1	1	0.151163	0.0213406	0.106697	0.0972237	1.01129	0.966769	86	73	13	0.955978	0.440215	0.0213406	5.55025	30.8053
60	Low	SNP	1	1	1	1	0.151163	0.392261	0.0231173	0.0420345	1.00982	0.984154	86	73	13	0.974582	0.254184	0.0231173	5.43488	29.538
65	Med	SNP	1	1	1	0.0584327	0.0231173	0.436888	0.739945	0.377011	0.780877	0.733615	86	73	13	0.939477	0.605234	0.0231173	5.43488	29.538
26	Low	SNP	1	0.396173	0.396173	0.396173	0.0238947	0.0277725	0.0420525	0.107031	0.964778	0.826231	85	72	13	0.856395	1.43605	0.0238947	5.38716	29.0215
83	Med	SNP	1	0.0677114	0.0362954	0.337183	1	1	1	1	0.327836	0.237923	86	73	13	0.725739	2.74261	0.0276312	5.17756	26.8071
29	Low	SNP	1	1	1	1	0.396173	0.396173	0.491902	0.0277725	0.967514	0.919	85	72	13	0.949857	0.501428	0.0277725	5.1702	26.731
119	High	SNP	1	1	0.446982	0.494579	0.119883	0.0569362	0.544225	1	0.627943	0.745167	84	72	12	1.18668	-1.86679	0.0301925	5.04967	25.4991
126	High	SNP	1	1	0.374082	0.188428	0.0504388	0.110972	0.113468	0.586947	0.581622	0.467917	84	72	12	0.804503	1.95497	0.0315057	4.98824	24.8826
115	Med	SNP	1	1	1	1	1	0.266781	0.266781	0.032386	0.966676	0.87335	84	72	12	0.903456	0.965436	0.032386	4.94848	24.4875
125	High	SNP	0.266781	0.032386	0.0982059	0.212891	0.281806	0.586064	1	1	0.395022	0.276233	84	72	12	0.699286	3.00714	0.032386	4.94848	24.4875
115	High	SNP	1	0.25085	0.284814	0.0413689	0.197302	0.352156	0.349688	0.497413	0.581882	0.422133	84	72	12	0.725462	2.74538	0.0334764	4.90071	24.017
32	High	SNP	1	1	1	0.396173	1	0.723281	0.760711	0.0611178	0.680333	0.644769	85	72	13	0.947725	0.522745	0.0343419	4.86389	23.6574
96	High	SNP	0.366043	0.0648163	0.054941	0.283145	0.446422	0.198905	0.588142	1	0.259767	0.108154	86	73	13	0.416349	5.83651	0.0393783	4.66646	21.7758
126	Low	SNP	1	1	1	1	0.546789	0.114551	0.483886	0.0601265	0.824617	0.709658	84	72	12	0.860592	1.39408	0.0400965	4.64038	21.5331
41	Med	SNP	1	1	1	1	0.573448	0.0420525	0.23215	0.292846	0.907931	0.801692	85	72	13	0.882989	1.17011	0.0420525	4.57167	20.9001
49	Low	SNP	1	1	1	1	1	1	0.116951	0.0423622	0.937723	0.804429	47	40	7	0.857854	1.42146	0.0423622	4.56108	20.8034
32	Low	SNP	1	1	1	1	1	0.284034	0.043395	0.282618	0.914472	0.882692	85	72	13	0.965248	0.347522	0.043395	4.52633	20.4876
82	High	SNP	0.212636	1	0.235457	0.128621	0.0627665	0.600803	1	1	0.331318	0.239631	86	73	13	0.723266	2.76734	0.0444074	4.49306	20.1875
97	Med	SNP	1	1	0.146897	0.0466618	0.467434	1	0.757381	1	0.668038	0.673242	84	72	12	1.00779	-0.0779024	0.0466618	4.42162	19.5507
51	High	SNP	0.343628	0.172667	0.12214	0.0723745	0.218788	0.731988	1	0.284906	0.403397	0.531077	86	73	13	1.31651	-3.16511	0.0500744	4.31978	18.6605
98	Low	SNP	1	1	1	0.365824	1	0.510461	1	0.0923565	0.691119	0.613692	84	72	12	0.887968	1.12032	0.0503486	4.3119	18.5925
94	High	SNP	1	1	1	1	1	0.691099	0.0643596	0.533049	0.759699	0.719769	86	73	13	0.94744	0.525595	0.0504753	4.30828	18.5613
3	High	SNP	1	1	0.491902	1	1	0.071122	0.08921	0.646401	0.574361	0.654846	85	72	13	1.14013	-1.4013	0.0516708	4.27451	18.2714
19	High	SNP	0.152941	0.152941	0.573448	1	0.446027	0.528116	0.548575	0.06697	0.687431	0.749308	85	72	13	1.09001	-0.900122	0.0542758	4.20355	17.6698
47	High	SNP	1	1	1	1	1	0.577885	0.661832	0.0993206	0.770932	0.844857	51	44	7	1.09589	-0.958909	0.0553966	4.17406	17.4228
52	High	SNP	1	1	1	1	1	1	0.280985	0.0584327	1.02601	0.965538	86	73	13	0.941058	0.589419	0.0584327	4.09708	16.7861
54	High	SNP	1	1	1	1	1	0.0584327	0.212636	0.329803	0.897233	0.780385	86	73	13	0.869768	1.30232	0.0584327	4.09708	16.7861
37	Low	SNP	1	1	1	1	1	1	0.152941	0.059755	0.990013	0.973154	85	72	13	0.982971	0.170287	0.059755	4.0648	16.5226
126	Med	SNP	1	1	0.266781	0.546789	1	0.202786	0.0937615	0.11269	0.660268	0.5632	84	72	12	0.852987	1.47013	0.0602852	4.05205	16.4191
45	High	SNP	0.746878	0.0780449	0.50353	1	1	1	1	1	0.2455	0.278	85	72	13	1.13238	-1.32383	0.0624726	4.00063	16.0051
105	Med	SNP	1	0.263866	0.370295	0.627701	1	0.723015	0.321339	0.117113	0.778603	0.832767	85	73	12	1.06957	-0.695657	0.0637057	3.97243	15.7802
26	High	SNP	1	0.131442	0.118144	0.450179	1	1	1	1	0.264514	0.197462	85	72	13	0.746507	2.53493	0.0638677	3.96877	15.7511
84	High	SNP	0.643574	0.535483	1	0.529041	0.112275	0.584681	1	1	0.335658	0.274615	86	73	13	0.818142	1.81858	0.0667589	3.9049	15.2482
56	Med	SNP	1	1	1	1	1	1	1	0.0668634	0.986178	0.897231	86	73	13	0.909806	0.90194	0.0668634	3.90264	15.2306
59	High	SNP	1	1	1	1	1	1	0.0668634	1	0.914548	0.945692	86	73	13	1.03405	-0.340544	0.0668634	3.90264	15.2306
76	Med	SNP	1	1	1	1	1	1	0.487449	0.0668634	0.963882	0.891085	86	73	13	0.924475	0.755254	0.0668634	3.90264	15.2306
105	High	SNP	0.383476	0.53316	0.227825	0.346595	0.329143	0.111183	0.350214	1	0.386388	0.269667	85	73	12	0.697917	3.02083	0.0670007	3.89968	15.2075
6	Med	SNP	1	1	1	1	1	0.284034	0.108987	0.0689428	0.943931	0.903154	85	72	13	0.956801	0.431988	0.0689428	3.85846	14.8877
6	Low	SNP	1	1	1	1	1	0.166667	0.166667	0.0704033	0.983538	0.943385	85	65	13	0.959174	0.408259	0.0704033	3.82821	14.6552
64	High	SNP	1	1	1	0.284906	0.132514	0.212636	0.0862356	0.366043	0.780479	0.702	86	73	13	0.899447	1.00553	0.0711422	3.81315	14.5401
74	Med	SNP	1	1	0.122213	0.329803	1	0.7545	0.715019	0.600803	0.515548	0.463862	86	73	13	0.899745	1.00255	0.077806	3.68397	13.5717
99	Med	SNP	1	1	1	0.586064	0.11269	0.72351	0.52429	0.543682	0.725725	0.842608	84	72	12	1.16106	-1.61057	0.0780145	3.68011	13.5432
35	High	SNP	1	1	1	1	1	1	0.113604	1	0.460708	0.452615	85	72	13	0.982434	0.175663	0.0786475	3.66846	13.4576
82	Med	SNP	0.0786609	0.759268	1	0.221953	0.283145	0.198905	0.588142	1	0.360319	0.264669	86	73	13	0.734541	2.65459	0.0786609	3.66821	13.4558
35	Med	SNP	1	1	1	1	0.348834	1	0.123865	0.52462	0.81525	0.839615	85	72	13	1.02989	-0.29887	0.0814056	3.61873	13.0952
60	High	SNP	1	0.539553	0.766459	0.170424	0.20232	0.588142	1	1	0.304151	0.235923	86	73	13	0.775678	2.24322	0.0825424	3.59872	12.9508
76	High	SNP	1	1	0.151163	0.392261	1	0.457916	0.0999097	0.137685	0.799601	0.728031	86	73	13	0.910492	0.895079	0.087882	3.50829	12.3081
84	Med	SNP	1	1	1	1	1	1	1	0.0999097	0.851562	0.810462	86	73	13	0.951736	0.482644	0.087882	3.50829	12.3081
14	High	SNP	0.152941	0.491902	1	1	0.236193	0.134566	0.103816	0.107031	0.558597	0.661077	85	72	13	1.18346	-1.83459	0.0890111	3.48987	12.1792
32	Med	SNP	1	1	0.152941	0.152941	0.165715	0.362107	1	0.125578	0.754903	0.694769	85	72	13	0.920343	0.796573	0.0902307	3.47024	12.0426
6	High	SNP	1	1	1	1	0.396173	0.573448	0.602065	0.103816	0.897958	0.826231	85	72	13	0.920121	0.798785	0.0925702	3.43331	11.7876
41	High	SNP	0.152941	1	0.442003	0.352009	0.135258	0.328164	0.673274	0.584112	0.494917	0.413385	85	72	13	0.835261	1.64739	0.092908	3.42805	11.7515
124	High	SNP	0.25085	0.346086	0.521397	0.202905	1	1	1	1	0.258951	0.179958	84	72	12	0.69495	3.0505	0.0941554	3.40881	11.62
30	High	SNP	1	1	1	0.348834	0.203008	0.450179	0.170935	0.227309	0.769875	0.92	85	72	13	1.195	-1.94999	0.0959766	3.38117	11.4323
90	High	SNP	0.13406	0.759414	1	0.749969	0.347467	0.584681	1	1	0.286658	0.225923	86	73	13	0.788129	2.11871	0.0980193	3.35079	11.2278
5	Low	SNP	1	1	1	1	1	0.396173	0.491902	0.100124	0.965042	0.934769	85	72	13	0.968631	0.31369	0.100124	3.32014	11.0233
9	Med	SNP	1	1	1	1	0.573448	0.100124	0.410583	0.136759	0.908361	0.889692	85	72	13	0.979448	0.205522	0.100124	3.32014	11.0233
28	Med	SNP	1	1	1	1	1	1	1	0.174237	0.875068	0.838857	51	44	7	0.958619	0.413808	0.102134	3.29146	10.8337
75	Low	SNP	1	1	1	1	1	0.1032	0.535483	0.766459	0.790792	0.755431	86	73	13	0.955284	0.44716	0.1032	3.27648	10.7354
72	Low	SNP	1	1	0.584681	0.588142	0.681097	0.172667	0.360779	0.137685	0.741616	0.831615	86	73	13	1.12136	-1.21355	0.105218	3.24854	10.553
62	Med	SNP	1	1	1	1	1	0.106697	0.619995	0.731988	0.896808	0.853231	86	73	13	0.951408	0.485917	0.106697	3.22841	10.4226
63	High	SNP	1	1	1	1	1	0.106697	0.360309	0.731988	0.881493	0.836154	86	73	13	0.948565	0.514347	0.106697	3.22841	10.4226
69	High	SNP	1	0.763952	1	1	0.347467	0.222608	0.106697	0.280985	0.246712	0.295454	86	73	13	1.19756	-1.97564	0.106697	3.22841	10.4226
78	Low	SNP	1	1	1	1	1	1	1	0.106697	1.06734	0.948762	86	73	13	0.888902	1.11098	0.106697	3.22841	10.4226
51	Low	SNP	1	1	1	1	1	1	1	0.176006	0.900603	0.858385	86	73	13	0.953122	0.468776	0.106895	3.22573	10.4053
62	High	SNP	1	1	1	0.176006	0.763952	0.552688	1	1	0.557616	0.557538	86	73	13	0.99986	0.00139836	0.106895	3.22573	10.4053
82	Low	SNP	1	1	1	0.600803	0.669837	1	0.176006	0.532444	0.833192	0.816692	86	73	13	0.980197	0.198027	0.106895	3.22573	10.4053
26	Med	SNP	1	0.226875	0.176692	0.107031	0.25512	0.727315	0.549418	1	0.707292	0.652385	85	72	13	0.92237	0.7763	0.107031	3.2239	10.3935
50	High	SNP	1	1	0.571034	1	1	0.691837	0.212655	1	0.60895	0.623143	47	40	7	1.02331	-0.233071	0.108254	3.20751	10.2881
37	High	SNP	1	1	1	0.584112	1	0.33411	0.55135	0.170935	0.667569	0.690077	85	72	13	1.03372	-0.337156	0.111133	3.16963	10.0466
38	High	SNP	1	1	1	0.584112	1	1	0.374664	0.14218	0.725014	0.780077	85	72	13	1.07595	-0.759476	0.112484	3.15221	9.93643
24	High	SNP	1	1	1	0.521529	1	0.704759	0.708983	0.113099	0.64063	0.699	55	46	9	1.09111	-0.911127	0.113099	3.14434	9.88686
83	High	SNP	0.212636	0.227825	1	1	1	1	1	1	0.219973	0.166615	86	73	13	0.757437	2.42563	0.113912	3.134	9.82197
87	Med	SNP	0.380494	0.347749	0.227825	0.360779	0.281014	0.684009	0.347467	1	0.359616	0.249538	86	73	13	0.693902	3.06098	0.113912	3.134	9.82197
103	Low	SNP	1	1	1	1	1	1	1	0.114551	0.990681	0.939375	84	72	12	0.948212	0.517882	0.114551	3.12594	9.77151
50	Low	SNP	1	1	1	1	1	0.213562	0.116951	0.3769	0.920425	0.849143	47	40	7	0.922555	0.774448	0.116951	3.09603	9.58539
122	High	SNP	1	1	1	1	1	0.681258	0.170196	1	0.759747	0.797258	84	72	12	1.04937	-0.493731	0.118079	3.08217	9.49978
123	High	SNP	1	1	1	1	1	0.34575	0.170196	0.352156	0.803733	0.771025	84	72	12	0.959304	0.406955	0.118079	3.08217	9.49978
83	Low	SNP	1	1	1	0.392261	0.132514	0.303169	0.223389	0.360779	0.753055	0.674923	86	73	13	0.896247	1.03753	0.123507	3.01733	9.1043
120	Med	SNP	1	1	1	1	0.725861	0.321565	0.212891	0.202786	0.672628	0.746258	84	72	12	1.10947	-1.09467	0.127763	2.96845	8.81172
8	Low	SNP	1	1	1	1	1	1	1	0.129354	0.950091	0.944667	53	44	9	0.994291	0.0570918	0.129354	2.95061	8.70608
112	High	SNP	1	1	0.142857	0.142857	0.46681	1	0.329156	0.212891	0.769372	0.709458	84	72	12	0.922126	0.778737	0.130389	2.9391	8.63833
89	High	SNP	0.229738	0.528879	0.213779	0.337183	0.500523	0.506634	1	1	0.283986	0.193923	86	73	13	0.682861	3.17139	0.132561	2.91527	8.49883
46	High	SNP	1	1	1	1	1	1	1	0.177313	0.871705	0.907429	51	44	7	1.04098	-0.409818	0.132852	2.91211	8.48038
17	High	SNP	1	1	1	1	1	1	0.214509	0.554477	0.830139	0.810923	85	72	13	0.976852	0.231477	0.135861	2.8798	8.29322
99	High	SNP	0.757381	0.725861	0.200107	1	1	1	1	1	0.135285	0.101125	84	72	12	0.747498	2.52502	0.135967	2.87867	8.28676
72	Med	SNP	1	1	0.584681	0.343628	0.684009	0.283145	0.758313	0.549962	0.717055	0.793915	86	73	13	1.10719	-1.07189	0.136617	2.8718	8.24721
93	High	SNP	1	0.150685	1	0.667638	0.159977	0.333501	0.307535	0.440698	0.620823	0.517909	73	62	11	0.83423	1.6577	0.138557	2.85145	8.13077
102	Med	SNP	1	1	1	0.266781	0.374082	1	1	0.203301	0.834039	0.881325	84	72	12	1.0567	-0.566953	0.139687	2.83973	8.06407
97	Low	SNP	1	1	1	1	1	0.365824	0.164301	1	0.815007	0.830433	84	72	12	1.01893	-0.189279	0.140685	2.82946	8.00584
113	Med	SNP	1	1	1	1	1	1	0.609851	0.164301	0.894337	0.859442	84	72	12	0.960981	0.390186	0.140685	2.82946	8.00584
110	Med	SNP	1	1	1	1	1	1	0.141176	0.542084	0.956162	1.01447	85	73	12	1.06098	-0.609782	0.141176	2.82443	7.9774
103	High	SNP	0.142857	0.202578	0.412406	1	1	0.3588	0.447013	1	0.528978	0.481	84	72	12	0.909301	0.90699	0.142857	2.80735	7.88124
112	Med	SNP	1	1	1	1	1	0.142857	0.546789	0.714318	0.909568	0.860208	84	72	12	0.945733	0.542672	0.142857	2.80735	7.88124
65	High	SNP	1	0.203165	0.762309	0.509654	0.683044	0.487449	1	1	0.353945	0.364615	86	73	13	1.03015	-0.301464	0.145456	2.78134	7.73586
75	High	SNP	0.619995	0.726451	0.763952	0.746075	0.203165	1	1	1	0.324496	0.279177	86	73	13	0.86034	1.3966	0.145456	2.78134	7.73586
124	Med	SNP	1	1	1	1	1	1	0.149764	0.202111	0.839507	0.774542	84	72	12	0.922615	0.77385	0.149764	2.73924	7.50341
25	High	SNP	1	1	1	0.577885	1	0.223223	0.322716	1	0.576091	0.539143	51	44	7	0.935864	0.641358	0.149904	2.73789	7.49602
52	Low	SNP	1	1	1	1	1	0.151163	0.151163	0.280985	1.06511	1.03877	86	73	13	0.97527	0.247302	0.151163	2.72583	7.43012
55	Low	SNP	1	1	1	1	1	0.151163	0.151163	0.280985	1.04937	1.05123	86	73	13	1.00177	-0.0177335	0.151163	2.72583	7.43012
39	High	SNP	1	1	1	1	1	1	1	0.188492	0.7275	0.830667	38	32	6	1.14181	-1.4181	0.151926	2.71856	7.39057
118	High	SNP	1	1	0.586064	0.653576	0.467434	0.222192	0.530793	0.725861	0.63175	0.590608	84	72	12	0.934877	0.651233	0.152853	2.70978	7.34292
3	Med	SNP	1	1	1	0.152941	0.573448	1	0.372194	1	0.701986	0.700769	85	72	13	0.998267	0.0173348	0.152941	2.70895	7.33842
3	Low	SNP	1	1	0.152941	0.152941	0.491902	0.727315	0.366712	1	0.696278	0.708538	85	72	13	1.01761	-0.176089	0.152941	2.70895	7.33842
11	Med	SNP	0.152941	0.491902	1	0.383476	1	0.763629	1	0.680917	0.583181	0.557846	85	72	13	0.956558	0.434418	0.152941	2.70895	7.33842
19	Med	SNP	0.152941	0.152941	0.396173	0.573448	1	0.68461	0.499256	1	0.803139	0.829846	85	72	13	1.03325	-0.332536	0.152941	2.70895	7.33842
30	Low	SNP	1	1	1	1	1	1	0.152941	0.152941	1.00014	1.04762	85	72	13	1.04747	-0.474699	0.152941	2.70895	7.33842
40	Low	SNP	1	1	1	1	0.152941	0.152941	0.396173	1	0.920736	0.954308	85	72	13	1.03646	-0.364617	0.152941	2.70895	7.33842
9	Low	SNP	1	1	1	1	1	0.156627	0.404229	1	0.947157	0.975692	85	70	13	1.03013	-0.301272	0.156627	2.6746	7.15348
119	Med	SNP	1	1	1	1	1	1	0.446982	0.277645	0.916057	0.9685	84	72	12	1.05725	-0.572487	0.160684	2.6377	6.95748
49	High	SNP	0.487624	0.571034	1	1	0.683844	0.225149	0.32865	1	0.510025	0.443429	47	40	7	0.869425	1.30575	0.160771	2.63692	6.95334
98	High	SNP	1	0.546789	0.679029	0.454947	1	0.346086	0.321229	0.684021	0.603243	0.532158	84	72	12	0.882162	1.17838	0.160958	2.63524	6.94451
31	High	SNP	1	1	1	1	0.322716	1	0.673135	1	0.620136	0.688	51	44	7	1.10943	-1.09433	0.161033	2.63458	6.94099
74	High	SNP	1	0.377011	1	0.229073	0.347467	1	0.568707	0.280985	0.252973	0.263115	86	73	13	1.04009	-0.400944	0.162314	2.62314	6.88087
85	High	SNP	0.701665	1	0.669837	0.669837	0.619995	0.162417	1	1	0.0924795	0.113	86	73	13	1.22189	-2.21893	0.162417	2.62223	6.87607
91	High	SNP	1	1	1	1	1	1	1	0.162417	0.985247	1.01069	86	73	13	1.02583	-0.258268	0.162417	2.62223	6.87607
7	Med	SNP	1	1	1	1	1	1	0.163636	0.30303	0.991239	0.938889	55	46	9	0.947187	0.528129	0.163636	2.61143	6.81959
5	Med	SNP	1	1	1	1	1	0.165715	0.226875	0.23215	0.932625	0.854231	85	72	13	0.915942	0.840576	0.165715	2.59322	6.72481
35	Low	SNP	1	1	1	1	1	1	0.165715	0.176692	0.983583	0.927231	85	72	13	0.942707	0.572931	0.165715	2.59322	6.72481
36	Med	SNP	1	1	1	1	1	1	0.165715	0.646401	0.963403	0.953154	85	72	13	0.989362	0.106383	0.165715	2.59322	6.72481
70	High	SNP	1	1	1	1	0.280985	0.171995	0.303169	0.764247	0.808164	0.749246	86	73	13	0.927096	0.729038	0.171995	2.53956	6.44936
86	Med	SNP	1	0.568707	0.171995	0.691099	1	0.329803	0.548841	0.370905	0.722233	0.667154	86	73	13	0.923738	0.762622	0.171995	2.53956	6.44936
13	Low	SNP	1	1	1	1	1	1	0.584574	0.327617	0.883217	1.00389	55	46	9	1.13663	-1.36627	0.173269	2.52891	6.39539
55	High	SNP	1	1	1	0.588142	1	1	0.244925	1	0.693479	0.668692	86	73	13	0.964257	0.357432	0.175816	2.50786	6.28938
1	High	SNP	1	1	1	1	1	0.450179	0.367929	0.24262	0.730222	0.784077	85	72	13	1.07375	-0.737511	0.176622	2.50126	6.2563
11	Low	SNP	1	1	1	0.573448	0.573448	0.176692	0.176692	0.703766	0.914639	0.876538	85	72	13	0.958344	0.416562	0.176692	2.50069	6.25345
121	High	SNP	1	1	1	1	1	1	1	0.281806	0.865406	0.887367	84	72	12	1.02538	-0.253767	0.186154	2.42543	5.8827
10	High	SNP	1	1	1	1	1	1	0.574442	0.257571	0.85287	0.908667	55	46	9	1.06542	-0.654228	0.188144	2.41009	5.80854
18	High	SNP	1	1	1	1	1	1	0.327406	0.257571	0.863826	0.891111	55	46	9	1.03159	-0.315862	0.188144	2.41009	5.80854
102	High	SNP	0.735195	0.754025	0.357857	0.754342	1	0.503701	0.188428	1	0.344626	0.394808	84	72	12	1.14561	-1.45613	0.188428	2.40792	5.79807
100	High	SNP	0.501356	0.533582	0.530793	1	0.343972	0.586947	1	1	0.261485	0.190033	84	72	12	0.726747	2.73253	0.194207	2.36433	5.59005
50	Med	SNP	1	1	1	1	1	1	1	0.329635	0.907375	0.900857	47	40	7	0.992817	0.0718319	0.196903	2.34444	5.4964
57	Med	SNP	1	1	1	1	1	0.449717	0.739945	0.356655	0.816411	0.799462	86	73	13	0.979239	0.207609	0.200163	2.32076	5.38591
108	Med	SNP	1	1	1	1	0.587876	0.683401	0.349797	0.755143	0.777803	0.802082	85	73	12	1.03122	-0.312158	0.210758	2.24634	5.04604
22	High	SNP	1	1	1	1	1	1	1	0.327406	0.924543	0.938	55	46	9	1.01455	-0.145548	0.214307	2.22225	4.9384
111	High	SNP	1	1	0.714318	1	1	0.521397	0.447013	0.586064	0.506686	0.465442	84	72	12	0.9186	0.814004	0.214672	2.2198	4.9275
36	High	SNP	1	1	1	1	0.284034	0.573448	0.362107	1	0.868472	0.856846	85	72	13	0.986613	0.133868	0.22045	2.18148	4.75884
14	Med	SNP	1	1	1	0.584112	0.680917	0.33411	0.768311	1	0.733681	0.777077	85	72	13	1.05915	-0.591489	0.22167	2.17352	4.72417
17	Med	SNP	1	1	1	1	1	0.396173	0.226875	0.646401	0.951847	0.935385	85	72	13	0.982705	0.172954	0.226875	2.14003	4.57973
34	High	SNP	1	1	1	1	1	1	1	0.226875	0.994931	0.977769	85	72	13	0.982751	0.172488	0.226875	2.14003	4.57973
41	Low	SNP	1	1	1	1	1	0.396173	0.491902	0.226875	1.01257	0.924385	85	72	13	0.91291	0.870902	0.226875	2.14003	4.57973
5	High	SNP	1	0.573448	1	0.682105	0.750577	0.372194	0.512164	0.680917	0.594486	0.594538	85	72	13	1.00009	-0.000880541	0.229463	2.12366	4.50995
79	High	SNP	0.337183	1	1	1	1	1	1	1	0.0899575	0.0554846	86	73	13	0.616787	3.83213	0.230288	2.11849	4.488
39	Med	SNP	1	1	1	1	1	1	0.412044	0.234085	0.904594	0.900333	38	32	6	0.99529	0.0470977	0.234085	2.0949	4.3886
56	High	SNP	1	1	1	0.568707	0.406486	0.320153	0.544697	0.758313	0.73374	0.667538	86	73	13	0.909776	0.902245	0.237611	2.07333	4.29868
71	High	SNP	0.392261	1	1	0.739945	1	1	0.539553	0.320153	0.581397	0.616631	86	73	13	1.0606	-0.606014	0.237611	2.07333	4.29868
28	High	SNP	1	1	1	1	1	1	1	0.400748	0.740773	0.709714	51	44	7	0.958073	0.419271	0.243947	2.03536	4.14269
51	Med	SNP	1	1	1	1	0.684009	0.533049	0.377011	0.520854	0.677164	0.722	86	73	13	1.06621	-0.662108	0.24445	2.03239	4.1306
40	Med	SNP	1	0.491902	1	1	1	0.325059	0.534224	0.768311	0.732903	0.666769	85	72	13	0.909765	0.902351	0.246564	2.01997	4.08026
55	Med	SNP	1	1	1	1	1	1	0.588142	0.446422	0.913986	0.929077	86	73	13	1.01651	-0.165108	0.250111	1.99936	3.99744
96	Low	SNP	1	1	1	1	1	1	1	0.446422	0.960986	0.959923	86	73	13	0.998894	0.0110639	0.250111	1.99936	3.99744
79	Med	SNP	1	0.731988	0.74949	0.55623	1	0.74949	0.726451	0.600803	0.45596	0.424938	86	73	13	0.931964	0.680362	0.253337	1.98087	3.92386
104	Med	SNP	1	1	1	0.263866	0.462447	1	1	0.444749	0.930759	0.995133	85	73	12	1.06916	-0.691634	0.253437	1.9803	3.92158
88	High	SNP	0.645567	0.381315	1	1	1	1	1	1	0.194235	0.1325	86	34	6	0.682162	3.17838	0.253766	1.97843	3.91418
86	High	SNP	0.374361	1	0.715019	0.619995	0.619995	1	1	1	0.181959	0.164308	86	73	13	0.902993	0.970066	0.257626	1.95665	3.82848
97	High	SNP	0.374082	0.653576	1	0.760505	1	0.501356	0.679029	0.260829	0.458004	0.521033	84	72	12	1.13762	-1.37617	0.260829	1.93882	3.75904
71	Med	SNP	1	1	1	1	0.284906	0.347467	1	0.499153	0.899068	0.928838	86	73	13	1.03311	-0.33112	0.261542	1.93489	3.74379
4	High	SNP	1	1	1	0.584574	0.701651	1	1	0.604357	0.595522	0.653222	55	46	9	1.09689	-0.968906	0.263762	1.92269	3.69674
110	Low	SNP	1	1	1	1	1	1	0.263866	0.608227	0.990322	0.99855	85	73	12	1.00831	-0.0830848	0.263866	1.92213	3.69456
8	Med	SNP	1	1	1	1	1	1	1	0.26677	0.942477	0.918556	53	44	9	0.974618	0.253817	0.26677	1.90633	3.63411
114	Med	SNP	1	1	1	1	1	1	1	0.266781	0.980565	0.963783	84	72	12	0.982885	0.171146	0.266781	1.90627	3.63387
117	High	SNP	1	1	1	1	1	0.266781	0.46681	0.319963	0.961412	0.9603	84	72	12	0.998843	0.0115716	0.266781	1.90627	3.63387
114	High	SNP	0.374082	0.546789	1	0.454947	0.510461	0.76223	0.530793	1	0.60186	0.555092	84	72	12	0.922294	0.777059	0.268792	1.89544	3.59268
11	High	SNP	0.573448	0.703766	1	0.543406	1	1	1	1	0.376681	0.348154	85	72	13	0.924268	0.757318	0.272919	1.87345	3.50983
29	High	SNP	1	1	0.491902	0.491902	1	0.723281	0.543406	0.534224	0.713444	0.746538	85	72	13	1.04639	-0.463863	0.272919	1.87345	3.50983
69	Med	SNP	1	0.568707	0.643574	1	1	1	0.532444	0.548575	0.716521	0.731762	86	73	13	1.02127	-0.212708	0.274287	1.86624	3.48285
20	High	SNP	1	1	0.529287	0.551969	1	1	1	0.396173	0.406056	0.391462	85	72	13	0.964059	0.359409	0.278323	1.84517	3.40464
104	High	SNP	1	0.683401	0.593717	1	1	1	1	1	0.107833	0.0806333	85	73	12	0.747762	2.52238	0.27932	1.84001	3.38564
107	High	SNP	1	1	1	1	0.593717	0.726926	1	1	0.701273	0.745625	85	73	12	1.06325	-0.632456	0.27932	1.84001	3.38564
107	Med	SNP	1	1	1	1	0.593717	1	1	0.748028	0.726336	0.789492	85	73	12	1.08695	-0.869516	0.27932	1.84001	3.38564
9	High	SNP	0.448153	1	1	1	0.723281	1	1	1	0.301986	0.284692	85	72	13	0.942733	0.572669	0.280251	1.83521	3.36799
52	Med	SNP	1	1	1	1	1	1	1	0.280985	1.05651	1.07985	86	73	13	1.02209	-0.22091	0.280985	1.83144	3.35415
54	Med	SNP	1	1	1	1	1	1	1	0.280985	1.06381	0.977	86	73	13	0.918399	0.816014	0.280985	1.83144	3.35415
77	High	SNP	0.280985	1	1	1	0.731988	0.543924	0.746627	1	0.611026	0.589838	86	73	13	0.965325	0.346754	0.280985	1.83144	3.35415
81	Low	SNP	1	1	1	1	1	0.280985	0.568707	1	1.02342	0.984477	86	73	13	0.961953	0.380473	0.280985	1.83144	3.35415
86	Low	SNP	1	1	1	1	1	1	1	0.280985	1.04904	0.996769	86	73	13	0.950172	0.498282	0.280985	1.83144	3.35415
48	High	SNP	1	1	1	1	0.661832	0.693188	0.410258	1	0.611568	0.610429	51	44	7	0.998137	0.0186345	0.282402	1.82418	3.32763
1	Low	SNP	1	1	1	1	0.284034	0.491902	1	0.723281	0.885125	0.912692	85	72	13	1.03115	-0.311451	0.284034	1.81587	3.29737
70	Med	SNP	1	1	1	1	1	1	1	0.284906	0.998068	0.948915	86	73	13	0.950752	0.492482	0.284906	1.81144	3.28133
61	High	SNP	1	1	1	1	1	1	1	0.577273	0.93137	0.922	53	46	7	0.98994	0.1006	0.294399	1.76415	3.11224
127	Med	SNP	1	1	1	1	1	1	1	0.294872	0.928364	0.898	13	11	2	0.967293	0.327066	0.294872	1.76184	3.10408
38	Low	SNP	1	1	1	1	1	1	1	0.588499	0.933056	0.971077	85	72	13	1.04075	-0.407493	0.298451	1.74443	3.04305
20	Low	SNP	1	1	1	1	1	0.300737	1	0.723842	0.900986	0.911769	85	70	13	1.01197	-0.119686	0.300737	1.73343	3.00476
10	Low	SNP	1	1	1	1	1	1	0.30303	0.521529	0.964696	0.977889	55	46	9	1.01368	-0.136761	0.30303	1.72247	2.96689
69	Low	SNP	1	1	1	1	1	1	1	0.588142	0.994575	0.982223	86	73	13	0.98758	0.124196	0.303236	1.72149	2.96352
72	High	SNP	1	1	1	0.588142	0.681097	0.506634	0.762498	0.762309	0.718918	0.742408	86	73	13	1.03267	-0.32674	0.303236	1.72149	2.96352
113	High	SNP	1	1	1	0.609851	1	0.526218	1	0.503701	0.655965	0.640525	84	72	12	0.976462	0.235382	0.304294	1.71646	2.94624
75	Med	SNP	1	0.392261	0.487449	1	0.746075	0.769038	0.509654	1	0.588407	0.602746	86	73	13	1.02437	-0.243697	0.307962	1.69918	2.8872
8	High	SNP	1	1	1	1	1	1	0.313498	0.700983	0.8955	0.891111	53	44	9	0.995099	0.0490105	0.313498	1.67347	2.80051
106	High	SNP	1	1	1	1	1	0.507569	0.758752	1	0.684962	0.657533	85	73	12	0.959956	0.400436	0.314857	1.66723	2.77966
80	High	SNP	1	1	1	1	0.487449	0.619995	1	0.546587	0.822663	0.816285	86	73	13	0.992247	0.0775335	0.318596	1.6502	2.72315
101	High	SNP	0.684021	1	1	1	1	1	1	0.46681	0.125486	0.09085	84	72	12	0.723985	2.76015	0.320128	1.64328	2.70036
18	Med	SNP	1	1	1	1	1	1	0.57782	0.574442	0.941065	1.00789	55	46	9	1.07101	-0.710085	0.323109	1.62991	2.6566
118	Med	SNP	1	1	1	1	0.586064	1	0.744222	0.760203	0.781232	0.773117	84	72	12	0.989612	0.103878	0.325235	1.62044	2.62584
120	Low	SNP	1	1	1	1	1	1	0.586064	1	0.976192	1.04688	84	72	12	1.07242	-0.724158	0.325235	1.62044	2.62584
57	High	SNP	1	1	0.584681	1	0.506634	0.7545	0.55623	0.533049	0.678411	0.683846	86	73	13	1.00801	-0.0801166	0.327602	1.60999	2.59205
78	High	SNP	1	1	0.487449	1	1	0.681097	0.723902	0.533049	0.842336	0.882031	86	73	13	1.04713	-0.471251	0.327602	1.60999	2.59205
81	High	SNP	1	0.487449	0.568707	1	1	0.684009	0.726451	1	0.797229	0.799369	86	73	13	1.00268	-0.0268487	0.32859	1.60564	2.57808
44	High	SNP	1	1	1	1	1	1	1	0.573195	0.887682	0.954571	51	44	7	1.07535	-0.753531	0.330991	1.59513	2.54445
49	Med	SNP	1	1	1	1	0.571034	1	0.584984	0.63035	0.908775	0.910143	47	40	7	1.00151	-0.0150516	0.340421	1.55461	2.41681
58	Med	SNP	1	1	1	1	1	1	1	0.34188	0.996864	0.9856	27	22	5	0.988701	0.112991	0.34188	1.54844	2.39766
73	High	SNP	1	0.726451	0.770556	1	0.727409	1	0.347467	1	0.375753	0.366123	86	73	13	0.974371	0.256294	0.347467	1.52505	2.32579
40	High	SNP	1	0.747039	1	0.584112	1	1	1	1	0.162194	0.150538	85	72	13	0.928136	0.718643	0.357237	1.48505	2.20536
93	Med	SNP	1	1	1	1	1	1	0.581855	0.685785	0.947403	1.02427	73	62	11	1.08114	-0.81137	0.361125	1.46943	2.15922
4	Med	SNP	1	1	1	1	1	1	1	0.665515	0.893174	0.931	55	46	9	1.04235	-0.423502	0.362359	1.46451	2.14478
116	High	SNP	1	1	1	1	1	1	1	0.441907	0.942507	0.941108	84	72	12	0.998516	0.0148393	0.363892	1.45842	2.12698
109	Low	SNP	1	1	1	1	1	1	1	0.370295	1.03685	1.05958	85	73	12	1.02193	-0.219274	0.370295	1.43325	2.05422
60	Med	SNP	1	0.715019	1	1	0.549962	1	1	1	0.443068	0.442615	86	73	13	0.998977	0.0102266	0.370407	1.43281	2.05296
100	Med	SNP	1	1	1	0.630081	1	0.725861	1	0.544225	0.797669	0.733242	84	72	12	0.91923	0.8077	0.372108	1.42621	2.03406
89	Med	SNP	1	1	1	1	1	1	1	0.681097	0.937027	0.958538	86	73	13	1.02296	-0.229567	0.373731	1.41993	2.01619
117	Med	SNP	1	1	1	1	1	1	1	0.374082	1.01309	1.01559	84	72	12	1.00247	-0.0246687	0.374082	1.41857	2.01235
73	Med	SNP	1	1	0.643574	0.731988	0.535483	1	0.761458	0.731988	0.615082	0.621708	86	73	13	1.01077	-0.107717	0.383238	1.38369	1.91459
116	Med	SNP	1	1	1	1	1	1	1	0.586947	0.991613	1.03244	84	72	12	1.04117	-0.411745	0.384369	1.37944	1.90284
123	Med	SNP	1	1	1	1	1	1	1	0.586947	0.969133	0.927667	84	72	12	0.957213	0.427874	0.384369	1.37944	1.90284
20	Med	SNP	0.573448	1	1	1	1	0.554477	0.764233	1	0.676667	0.658308	85	72	13	0.972869	0.271315	0.3844	1.37932	1.90252
109	Med	SNP	1	1	1	1	0.462447	1	0.721595	0.762373	0.810782	0.838167	85	73	12	1.03378	-0.337754	0.385424	1.37548	1.89195
53	High	SNP	0.758313	0.739945	1	1	1	1	1	1	0.151247	0.138923	86	73	13	0.91852	0.814795	0.387906	1.36622	1.86656
23	High	SNP	1	0.421384	1	0.709721	1	0.704759	1	0.604357	0.524261	0.527222	55	46	9	1.00565	-0.0564864	0.39005	1.35827	1.8449
33	High	SNP	1	1	1	1	1	1	1	0.577885	0.956636	0.989571	51	44	7	1.03443	-0.34428	0.391964	1.35121	1.82576
64	Med	SNP	1	1	1	1	1	1	1	0.392261	0.979151	0.979538	86	73	13	1.0004	-0.00396024	0.392261	1.35011	1.82281
68	Med	SNP	1	1	1	1	1	1	1	0.392261	1.00782	1.01152	86	73	13	1.00367	-0.0367242	0.392261	1.35011	1.82281
77	Med	SNP	1	1	1	1	1	1	1	0.392261	0.978958	0.921931	86	73	13	0.941747	0.582525	0.392261	1.35011	1.82281
81	Med	SNP	1	1	0.392261	0.487449	1	1	1	1	0.928203	0.9121	86	73	13	0.982652	0.173483	0.392261	1.35011	1.82281
92	Low	SNP	1	1	1	1	1	0.392261	1	0.683044	0.918562	0.856692	86	73	13	0.932645	0.673546	0.392261	1.35011	1.82281
2	High	SNP	1	1	1	1	1	1	0.57782	0.692128	0.865	0.867556	55	46	9	1.00295	-0.029544	0.394035	1.3436	1.80527
12	High	SNP	1	1	1	1	1	1	1	0.57782	0.918109	0.988889	55	46	9	1.07709	-0.770935	0.394035	1.3436	1.80527
16	Low	SNP	1	1	1	1	1	1	1	0.57782	0.945978	0.983111	55	46	9	1.03925	-0.392534	0.394035	1.3436	1.80527
24	Low	SNP	1	1	1	1	1	1	1	0.57782	0.924609	1.00589	55	46	9	1.08791	-0.879077	0.394035	1.3436	1.80527
19	Low	SNP	1	1	1	1	0.396173	1	0.646401	0.703766	0.936264	0.938846	85	72	13	1.00276	-0.0275805	0.396173	1.3358	1.78436
43	High	SNP	1	1	1	1	1	1	0.402998	1	0.901121	0.894	39	33	6	0.992097	0.0790261	0.402998	1.31115	1.71913
79	Low	SNP	1	1	1	1	1	1	1	1	0.957526	0.936046	86	69	13	0.977567	0.224327	0.411888	1.27967	1.63757
39	Low	SNP	1	1	1	1	1	1	0.412044	0.412044	0.946406	0.916333	38	32	6	0.968224	0.317759	0.412044	1.27913	1.63618
29	Med	SNP	1	1	1	1	0.491902	0.573448	0.622091	1	0.885486	0.889692	85	72	13	1.00475	-0.0475016	0.415372	1.26753	1.60662
4	Low	SNP	1	1	1	1	1	1	1	0.421384	0.963609	0.961778	55	46	9	0.9981	0.0190006	0.421384	1.24679	1.55449
67	Med	SNP	1	1	1	1	1	1	0.422085	1	0.807687	0.796667	19	16	3	0.986355	0.136449	0.422085	1.2444	1.54852
66	Low	SNP	1	1	1	1	1	1	1	1	0.999589	0.984615	86	73	13	0.98502	0.149798	0.431293	1.21326	1.472
7	High	SNP	1	1	1	1	1	1	1	0.434645	0.955636	0.891	55	44	9	0.932363	0.67637	0.434645	1.20209	1.44502
38	Med	SNP	1	1	1	1	1	1	0.673274	0.750673	0.845917	0.870846	85	72	13	1.02947	-0.294704	0.434668	1.20201	1.44484
101	Low	SNP	1	1	1	1	1	1	1	0.630081	0.969433	0.9683	84	72	12	0.998831	0.0116907	0.435873	1.19802	1.43525
102	Low	SNP	1	1	1	1	1	1	1	1	0.946128	0.986333	84	72	12	1.04249	-0.424948	0.453211	1.14174	1.30358
25	Med	SNP	1	1	1	1	1	1	1	1	0.924295	0.912286	51	44	7	0.987007	0.129934	0.462316	1.11305	1.23888
48	Med	SNP	1	1	1	1	1	1	1	1	0.908341	0.927571	51	44	7	1.02117	-0.21171	0.462316	1.11305	1.23888
48	Low	SNP	1	1	1	1	1	1	1	1	0.919273	0.958	51	44	7	1.04213	-0.421281	0.462316	1.11305	1.23888
107	Low	SNP	1	1	1	1	1	1	1	0.462447	0.97253	1.02011	85	73	12	1.04892	-0.489221	0.462447	1.11264	1.23797
121	Low	SNP	1	1	1	1	1	1	1	0.46681	1.03924	0.9984	84	72	12	0.960703	0.392968	0.46681	1.09909	1.208
21	High	SNP	1	1	1	1	1	1	1	0.692128	0.882152	0.891556	55	46	9	1.01066	-0.106596	0.467699	1.09635	1.20198
37	Med	SNP	1	1	1	1	1	1	0.573448	0.646401	0.931222	0.922846	85	72	13	0.991005	0.089947	0.475041	1.07387	1.15321
10	Med	SNP	1	1	1	1	1	1	1	1	0.958891	1.03289	55	46	9	1.07717	-0.771699	0.478471	1.0635	1.13102
23	Med	SNP	1	1	1	1	1	1	1	1	0.959978	0.962444	55	46	9	1.00257	-0.02569	0.478471	1.0635	1.13102
63	Med	SNP	1	1	1	1	1	1	1	0.487449	0.994274	0.982538	86	73	13	0.988197	0.118031	0.487449	1.03668	1.0747
66	High	SNP	1	1	1	1	1	1	0.487449	1	0.940685	0.927769	86	73	13	0.98627	0.137301	0.487449	1.03668	1.0747
76	Low	SNP	1	1	1	1	1	1	1	0.487449	1.02592	0.962977	86	73	13	0.93865	0.613496	0.487449	1.03668	1.0747
1	Med	SNP	1	1	1	1	0.491902	1	0.717791	1	0.841736	0.846769	85	72	13	1.00598	-0.0597946	0.491902	1.02356	1.04767
14	Low	SNP	1	1	1	1	0.491902	0.491902	0.673274	1	0.8975	0.947769	85	72	13	1.05601	-0.560103	0.491902	1.02356	1.04767
30	Med	SNP	1	1	1	1	1	1	1	0.491902	0.981069	1.01992	85	72	13	1.0396	-0.396034	0.491902	1.02356	1.04767
45	Low	SNP	1	1	1	1	1	1	1	0.491902	0.985736	0.955769	85	72	13	0.969599	0.304005	0.491902	1.02356	1.04767
87	Low	SNP	1	1	1	1	1	1	1	1	0.996233	1.015	86	73	13	1.01884	-0.188381	0.512551	0.964233	0.929745
95	Med	SNP	1	1	1	1	1	1	1	1	1.00741	0.986077	86	73	13	0.978823	0.211771	0.512551	0.964233	0.929745
95	Low	SNP	1	1	1	1	1	1	1	1	1.02553	1.01285	86	73	13	0.987628	0.123722	0.512551	0.964233	0.929745
101	Med	SNP	1	1	1	1	1	1	1	1	0.591419	0.5841	84	72	12	0.987624	0.123761	0.520676	0.941543	0.886503
61	Med	SNP	1	1	1	1	1	1	1	0.522333	0.985	0.934	53	46	7	0.948223	0.517767	0.522333	0.936958	0.877891
45	Med	SNP	1	1	1	1	0.573448	1	1	1	0.892778	0.918308	85	72	13	1.0286	-0.28596	0.524959	0.929724	0.864387
118	Low	SNP	1	1	1	1	1	1	1	1	0.966153	0.995675	84	72	12	1.03056	-0.305565	0.53319	0.907279	0.823156
104	Low	SNP	1	1	1	1	1	1	1	1	1.04321	1.12864	85	73	12	1.08189	-0.818907	0.537553	0.89552	0.801956
106	Med	SNP	1	1	1	1	1	1	1	1	0.979879	1.03765	85	73	12	1.05896	-0.589568	0.537553	0.89552	0.801956
108	High	SNP	1	1	1	1	1	1	1	1	0.0363178	0.0105167	85	73	12	0.289573	7.10427	0.537553	0.89552	0.801956
24	Med	SNP	1	1	1	1	1	1	1	1	0.886087	0.941556	55	46	9	1.0626	-0.625995	0.542607	0.882021	0.777961
99	Low	SNP	1	1	1	1	1	1	0.546789	1	0.940444	1.00562	84	72	12	1.06931	-0.693082	0.546789	0.870944	0.758544
122	Low	SNP	1	1	1	1	1	1	1	0.546789	1.01967	0.999517	84	72	12	0.980239	0.197614	0.546789	0.870944	0.758544
15	High	SNP	1	1	1	1	1	1	1	1	0.989159	1.017	55	44	9	1.02815	-0.28146	0.565355	0.822772	0.676953
68	High	SNP	1	1	1	1	1	0.568707	1	1	0.853411	0.882192	86	73	13	1.03373	-0.337251	0.568707	0.814242	0.66299
27	High	SNP	1	1	1	1	1	1	1	1	0.854068	0.835571	51	44	7	0.978343	0.216572	0.570812	0.808913	0.65434
17	Low	SNP	1	1	1	1	1	1	1	0.573448	0.966708	0.993538	85	72	13	1.02775	-0.277541	0.573448	0.802265	0.643629
74	Low	SNP	1	1	1	1	1	1	1	1	0.986151	0.958323	86	73	13	0.971782	0.282184	0.577207	0.79284	0.628595
96	Med	SNP	1	1	1	1	1	1	1	1	0.93074	0.922538	86	73	13	0.991188	0.0881156	0.577207	0.79284	0.628595
67	High	SNP	1	1	1	1	1	1	1	1	0.05125	0.0203333	19	16	3	0.396748	6.03252	0.577915	0.79107	0.625791
16	High	SNP	1	1	1	1	1	1	1	1	0.958413	0.967	55	46	9	1.00896	-0.0895956	0.578616	0.789321	0.623028
18	Low	SNP	1	1	1	1	1	1	1	1	0.952891	0.972444	55	46	9	1.02052	-0.205198	0.578616	0.789321	0.623028
21	Med	SNP	1	1	1	1	1	1	1	1	0.96987	0.996889	55	46	9	1.02786	-0.278587	0.578616	0.789321	0.623028
22	Med	SNP	1	1	1	1	1	1	1	1	0.951587	0.995222	55	46	9	1.04586	-0.458553	0.578616	0.789321	0.623028
57	Low	SNP	1	1	1	1	1	1	1	1	1.01373	0.999769	86	73	13	0.986232	0.137678	0.591119	0.758481	0.575293
80	Med	SNP	1	1	1	1	1	1	1	1	0.977029	0.943515	86	73	13	0.965699	0.343013	0.591119	0.758481	0.575293
59	Med	SNP	1	1	1	1	1	1	1	1	1.00288	1.02392	86	73	13	1.02099	-0.20986	0.607739	0.718476	0.516208
66	Med	SNP	1	1	1	1	1	1	1	1	0.99874	1.00931	86	73	13	1.01058	-0.105813	0.607739	0.718476	0.516208
68	Low	SNP	1	1	1	1	1	1	1	1	1.04104	1.03487	86	73	13	0.994071	0.0592856	0.607739	0.718476	0.516208
70	Low	SNP	1	1	1	1	1	1	1	1	1.05503	1.04042	86	73	13	0.986157	0.138426	0.607739	0.718476	0.516208
71	Low	SNP	1	1	1	1	1	1	1	1	1.05405	1.02568	86	73	13	0.973077	0.269226	0.607739	0.718476	0.516208
73	Low	SNP	1	1	1	1	1	1	1	1	1.05533	1.05109	86	73	13	0.995986	0.0401435	0.607739	0.718476	0.516208
78	Med	SNP	1	1	1	1	1	1	1	1	0.985921	0.972654	86	73	13	0.986544	0.134562	0.607739	0.718476	0.516208
89	Low	SNP	1	1	1	1	1	1	1	1	1.02948	1.06885	86	73	13	1.03824	-0.382394	0.607739	0.718476	0.516208
90	Low	SNP	1	1	1	1	1	1	1	1	1.02856	1.03769	86	73	13	1.00888	-0.0887713	0.607739	0.718476	0.516208
91	Low	SNP	1	1	1	1	1	1	1	1	1.04027	1.05438	86	73	13	1.01356	-0.135643	0.607739	0.718476	0.516208
94	Low	SNP	1	1	1	1	1	1	1	1	0.999288	1.00231	86	73	13	1.00302	-0.0302218	0.607739	0.718476	0.516208
46	Med	SNP	1	1	1	1	1	1	1	1	0.907341	0.909143	51	44	7	1.00199	-0.0198597	0.608036	0.71777	0.515194
93	Low	SNP	1	1	1	1	1	1	1	1	1.04821	1.02536	73	62	11	0.978205	0.217953	0.608078	0.717672	0.515054
120	High	SNP	1	1	1	1	1	1	1	1	0.0258778	0.00515833	84	72	12	0.199334	8.00666	0.615631	0.699862	0.489807
111	Low	SNP	1	1	1	1	1	1	1	1	1.01432	1.04422	84	72	12	1.02948	-0.29478	0.625918	0.675954	0.456913
121	Med	SNP	1	1	1	1	1	1	1	1	0.980097	0.979683	84	72	12	0.999578	0.00422296	0.625918	0.675954	0.456913
122	Med	SNP	1	1	1	1	1	1	1	1	0.944636	0.938108	84	72	12	0.99309	0.0691036	0.625918	0.675954	0.456913
123	Low	SNP	1	1	1	1	1	1	1	1	1.03174	1.01999	84	72	12	0.988617	0.113832	0.625918	0.675954	0.456913
94	Med	SNP	1	1	1	1	1	1	1	1	0.946041	0.894462	86	73	13	0.945479	0.545215	0.626269	0.675146	0.455822
105	Low	SNP	1	1	1	1	1	1	1	1	1.04972	1.10838	85	73	12	1.05588	-0.558834	0.629705	0.667251	0.445224
31	Med	SNP	1	1	1	1	1	1	1	1	0.981432	1.03929	51	44	7	1.05895	-0.589484	0.635966	0.652978	0.42638
127	High	SNP	1	1	1	1	1	1	1	1	0.664909	0.7645	13	11	2	1.14978	-1.49781	0.641026	0.641546	0.411581
58	High	SNP	1	1	1	1	1	1	1	1	0.931045	0.9272	27	22	5	0.99587	0.0413025	0.65812	0.603578	0.364307
119	Low	SNP	1	1	1	1	1	1	1	1	0.987458	0.949483	84	72	12	0.961543	0.384573	0.680037	0.556314	0.309485
88	Low	SNP	1	1	1	1	1	1	1	1	1.01207	1.04092	86	73	13	1.02851	-0.285105	0.696764	0.521258	0.27171
2	Low	SNP	1	1	1	1	1	1	1	1	0.980783	0.973	55	46	9	0.992065	0.0793511	0.69697	0.520832	0.271266
2	Med	SNP	1	1	1	1	1	1	1	1	0.97863	0.986667	55	46	9	1.00821	-0.082117	0.69697	0.520832	0.271266
7	Low	SNP	1	1	1	1	1	1	1	1	0.979913	1.017	55	46	9	1.03785	-0.378472	0.69697	0.520832	0.271266
12	Low	SNP	1	1	1	1	1	1	1	1	0.972609	1.00633	55	46	9	1.03467	-0.346744	0.69697	0.520832	0.271266
12	Med	SNP	1	1	1	1	1	1	1	1	0.988283	1.07056	55	46	9	1.08325	-0.832484	0.69697	0.520832	0.271266
15	Med	SNP	1	1	1	1	1	1	1	1	1.02039	1.04833	55	46	9	1.02738	-0.273837	0.69697	0.520832	0.271266
22	Low	SNP	1	1	1	1	1	1	1	1	0.952	0.998333	55	46	9	1.04867	-0.486695	0.69697	0.520832	0.271266
23	Low	SNP	1	1	1	1	1	1	1	1	0.959478	1.04033	55	46	9	1.08427	-0.842698	0.69697	0.520832	0.271266
36	Low	SNP	1	1	1	1	1	1	1	1	1.00401	1.03645	85	72	13	1.03231	-0.323103	0.715966	0.482036	0.232359
56	Low	SNP	1	1	1	1	1	1	1	1	1.05208	1.03962	86	73	13	0.988152	0.118484	0.719015	0.475906	0.226487
59	Low	SNP	1	1	1	1	1	1	1	1	1.01332	1.09799	86	73	13	1.08356	-0.835646	0.719015	0.475906	0.226487
77	Low	SNP	1	1	1	1	1	1	1	1	1.02317	0.969169	86	73	13	0.947223	0.527765	0.719015	0.475906	0.226487
80	Low	SNP	1	1	1	1	1	1	1	1	1.0374	0.987085	86	73	13	0.9515	0.485002	0.719015	0.475906	0.226487
85	Low	SNP	1	1	1	1	1	1	1	1	1.04727	1.06231	86	73	13	1.01436	-0.143551	0.719015	0.475906	0.226487
111	Med	SNP	1	1	1	1	1	1	1	1	0.97589	1.00353	84	72	12	1.02833	-0.28326	0.733219	0.447685	0.200422
112	Low	SNP	1	1	1	1	1	1	1	1	1.04501	1.03192	84	72	12	0.987471	0.125291	0.733219	0.447685	0.200422
124	Low	SNP	1	1	1	1	1	1	1	1	0.9909	0.967425	84	72	12	0.976309	0.236906	0.733219	0.447685	0.200422
109	High	SNP	1	1	1	1	1	1	1	1	0.0237507	0.0167833	85	73	12	0.706646	2.93354	0.736134	0.441959	0.195328
25	Low	SNP	1	1	1	1	1	1	1	1	1.00809	0.932429	51	44	7	0.924945	0.750551	0.741961	0.430585	0.185404
27	Med	SNP	1	1	1	1	1	1	1	1	0.996841	0.999857	51	44	7	1.00303	-0.030258	0.741961	0.430585	0.185404
58	Low	SNP	1	1	1	1	1	1	1	1	1.0085	1.0004	27	22	5	0.991968	0.0803174	0.814815	0.295456	0.0872942
15	Low	SNP	1	1	1	1	1	1	1	1	0.9895	1.03078	55	46	9	1.04172	-0.417158	0.836364	0.257798	0.0664597
21	Low	SNP	1	1	1	1	1	1	1	1	0.976326	1.00744	55	46	9	1.03187	-0.318729	0.836364	0.257798	0.0664597
67	Low	SNP	1	1	1	1	1	1	1	1	1.03325	1.07333	19	16	3	1.03879	-0.387934	0.842105	0.247928	0.0614681
34	Med	SNP	1	1	1	1	1	1	1	1	1.03997	1.01615	85	72	13	0.977097	0.229029	0.847059	0.239466	0.0573439
64	Low	SNP	1	1	1	1	1	1	1	1	1.04949	1.08215	86	73	13	1.03112	-0.311204	0.848837	0.23644	0.055904
84	Low	SNP	1	1	1	1	1	1	1	1	1.05612	1.06385	86	73	13	1.00731	-0.0731378	0.848837	0.23644	0.055904
91	Med	SNP	1	1	1	1	1	1	1	1	1.03745	0.991769	86	73	13	0.955966	0.440337	0.848837	0.23644	0.055904
116	Low	SNP	1	1	1	1	1	1	1	1	1.04589	1.09334	84	72	12	1.04537	-0.453652	0.857143	0.222392	0.0494584
125	Low	SNP	1	1	1	1	1	1	1	1	1.05134	1.04607	84	72	12	0.994991	0.0500948	0.857143	0.222392	0.0494584
106	Low	SNP	1	1	1	1	1	1	1	1	1.0322	1.07189	85	73	12	1.03845	-0.384493	0.858824	0.219566	0.0482094
108	Low	SNP	1	1	1	1	1	1	1	1	1.01998	1.02721	85	73	12	1.00708	-0.0708337	0.858824	0.219566	0.0482094
42	High	SNP	1	1	1	1	1	1	1	1	1.02377	1.003	51	44	7	0.97971	0.202904	0.862745	0.212994	0.0453663
44	Med	SNP	1	1	1	1	1	1	1	1	0.970636	0.948	51	44	7	0.976679	0.233212	0.862745	0.212994	0.0453663
46	Low	SNP	1	1	1	1	1	1	1	1	0.943909	0.979857	51	44	7	1.03808	-0.380842	0.862745	0.212994	0.0453663
61	Low	SNP	1	1	1	1	1	1	1	1	1.05798	1.09957	53	46	7	1.03931	-0.393138	0.867925	0.204358	0.0417624
16	Med	SNP	1	1	1	1	1	1	1	1	0.972674	0.982889	55	46	9	1.0105	-0.105019	1	0	0
27	Low	SNP	1	1	1	1	1	1	1	1	1.0447	0.970429	51	44	7	0.928902	0.710976	1	0	0
28	Low	SNP	1	1	1	1	1	1	1	1	0.978045	0.999857	51	44	7	1.0223	-0.223013	1	0	0
31	Low	SNP	1	1	1	1	1	1	1	1	1.01448	1.00757	51	44	7	0.993193	0.068073	1	0	0
33	Low	SNP	1	1	1	1	1	1	1	1	1.0535	1.03029	51	44	7	0.977965	0.220354	1	0	0
33	Med	SNP	1	1	1	1	1	1	1	1	1.04384	1.03129	51	44	7	0.987972	0.120279	1	0	0
34	Low	SNP	1	1	1	1	1	1	1	1	1.0715	1.04685	85	72	13	0.976991	0.230087	1	0	0
42	Med	SNP	1	1	1	1	1	1	1	1	1.06766	1.05014	51	44	7	0.983594	0.164062	1	0	0
42	Low	SNP	1	1	1	1	1	1	1	1	1.0735	1.01843	51	44	7	0.948699	0.513008	1	0	0
43	Low	SNP	1	1	1	1	1	1	1	1	1.03261	0.981667	39	33	6	0.950669	0.493309	1	0	0
43	Med	SNP	1	1	1	1	1	1	1	1	0.994455	1.014	39	33	6	1.01965	-0.196544	1	0	0
44	Low	SNP	1	1	1	1	1	1	1	1	1.00086	0.964571	51	44	7	0.963739	0.362609	1	0	0
47	Low	SNP	1	1	1	1	1	1	1	1	0.990591	0.958	51	44	7	0.9671	0.329005	1	0	0
47	Med	SNP	1	1	1	1	1	1	1	1	0.976227	0.975143	51	44	7	0.998889	0.0111083	1	0	0
54	Low	SNP	1	1	1	1	1	1	1	1	1.06721	1.07538	86	73	13	1.00766	-0.0766406	1	0	0
63	Low	SNP	1	1	1	1	1	1	1	1	1.07036	1.08169	86	73	13	1.01059	-0.10591	1	0	0
100	Low	SNP	1	1	1	1	1	1	1	1	1.05728	1.07935	84	72	12	1.02087	-0.208698	1	0	0
113	Low	SNP	1	1	1	1	1	1	1	1	1.02105	1.01878	84	72	12	0.997781	0.0221859	1	0	0
114	Low	SNP	1	1	1	1	1	1	1	1	1.04005	1.02102	84	72	12	0.981706	0.182937	1	0	0
115	Low	SNP	1	1	1	1	1	1	1	1	1.04633	1.05354	84	72	12	1.0069	-0.0689581	1	0	0
117	Low	SNP	1	1	1	1	1	1	1	1	1.07356	1.10765	84	72	12	1.03176	-0.317572	1	0	0
127	Low	SNP	1	1	1	1	1	1	1	1	0.995909	1.0025	13	11	2	1.00662	-0.0661794	1	0	0

## Sheet: Fisher_summary
Effect	P Value	Cpd Number	Compoud Name	Target				Enrichment
-4.59651	0.00359563	13	CL-387,785	ERBB2, EGFR
2.95985	0.0088084	95	DM3189	BMP1
1.28988	0.00892938	53	CGP60474	CDK 1,2,5,7,9					Stat_signif	Not_Stat Signif
2.28548	0.0138843	92	PP 242	mTOR				mTOR inh	5	1
1.02602	0.0162628	88	MS275	HDAC				Other	15	66
1.47484	0.0191176	98	AZD1152	AURK				2-Tail : p-value = 0.0021337974919663923
4.62848	0.0201141	87	GW843682X	PLK1
1.56296	0.0202964	110	Seliciclib	CDK
1.15268	0.0211818	125	BEZ235	mTOR, PI3K
0.250595	0.0213406	62	BMS-536924	IGF1R
0.440215	0.0213406	65	JW-5-8-1	mTOR, PI3K
0.254184	0.0231173	60	BI-2536	PLK1,2,3
2.74261	0.0276312	83	Torin	mTOR
0.501428	0.0277725	29	AZ628	RAF
-1.86679	0.0301925	119	Lapatinib	ERBB2, EGFR
1.95497	0.0315057	126	RAD001	mTOR
0.522745	0.0343419	32	VX680	AURK, FLT3
5.83651	0.0393783	96	Pimozide	STAT3
1.17011	0.0420525	41	S-Trityl-L-cysteine	Eg5
-0.0779024	0.0466618	97	AZD6244	MEK 1/2
-3.16511	0.0500744	51	Dasatinib	ABL, SRC
0.525595	0.0504753	94	TGX 221	PI3Kb
-0.900122	0.0542758	19	Go 6976	PKC
0.589419	0.0584327	52	GNF2	ALB
1.30232	0.0584327	54	CGP082996	CDK4
0.170287	0.059755	37	PF02341066	ALK, MET
-1.32383	0.0624726	45	Z-L-L-Norleucine-CHO	g-secretase
-0.695657	0.0637057	105	MLN4924	NAE
1.81858	0.0667589	84	AZ960	JAK2
-0.340544	0.0668634	59	WZ-1-84	BMX
0.90194	0.0668634	56	WH-4-023	SRC
0.431988	0.0689428	6	PHA665752	MET
1.00553	0.0711422	64	KIN001-128	RSK
-1.61057	0.0780145	99	AZD6474/Zactima	VEGFR/EGFR/RET
0.175663	0.0786475	35	NVP-TAE684	ALK
-1.83459	0.0890111	14	HKI-272	ERBB2, EGFR
-1.94999	0.0959766	30	Sorafenib	KIT, FLT3, RAF
0.205522	0.100124	9	MG-132	Proteasome
0.413808	0.102134	28	MLN8054	AURK
0.514347	0.106697	63	KIN001-127	ITK
-0.759476	0.112484	38	AZD0530/ Saracatinib	SRC
-0.911127	0.113099	24	UO-126	MEK1/2
0.0570918	0.129354	8	SU6656	SRC
3.17139	0.132561	89	Parthenolide	NF-kB
0.231477	0.135861	17	Cyclopamine	SMO
1.6577	0.138557	93	ROCK inhibitor 1	ROCK
-0.0177335	0.151163	55	A770041	SRC
-0.364617	0.152941	40	TP-155	NF-kB
0.434418	0.152941	11	Taxol	TUBB
-1.09433	0.161033	31	KIN0001-001	SRC, ABL
-0.258268	0.162417	91	GSK319347A	IKKe
0.528129	0.163636	7	AG1024	IGF1R
0.106383	0.165715	36	PD-173074	FGFR family
0.762622	0.171995	86	A443644	AKT
-0.737511	0.176622	1	Tarceva, Erlotinib	EGFR
-0.654228	0.188144	10	L-685,458	g-secretase
-0.315862	0.188144	18	SB203580	p38MAPK
2.73253	0.194207	100	XAV939	TTK (Mitosis)
0.207609	0.200163	57	WH-4-025	SRC
-0.145548	0.214307	22	LM-1685	COX2
0.814004	0.214672	111	Salubrinal	GADD34-PP1C
0.172488	0.226875	34	Imatinib	ABL, KIT, PDGFR
-0.000880541	0.229463	5	Sunitinib	VEGFR
-0.606014	0.237611	71	Pyrimethamine	STAT3, MATE1/2, DHFR
-0.691634	0.253437	104	Bortezomib	Proteasome
-0.968906	0.263762	4	LY294002	mTOR, PI3K
0.359409	0.278323	20	Geldanamycin	HSP90
0.1006	0.294399	61	AMG706	VEGFR
0.327066	0.294872	127	GSK269962A	ROCK
0.400436	0.314857	106	XMD8-85	ERK5
0.0775335	0.318596	80	MRK 003	g-secretase
-0.753531	0.330991	44	PD98059	MEK1/2
0.112991	0.34188	58	JW-2-8-1	AURK
0.256294	0.347467	73	Ro 31-7453	TUBB
-0.219274	0.370295	109	Honokiol	Ras/PI3K signaling
-0.0564864	0.39005	23	KN-93	CAMK
-0.34428	0.391964	33	Myoseverin	TUBB
-0.0367242	0.392261	68	BAY65-1942	IKKb
-0.770935	0.394035	12	Cisplatin	DNA
-0.392534	0.394035	16	JAK2 Inhib2	JAK
-0.029544	0.394035	2	HCQ	Lyzosome
0.0790261	0.402998	43	Go-6983	PKC
0.136449	0.422085	67	GST-MDA-7	IL24
0.149798	0.431293	66	HG-3-32-01	KIT, PDGFR
-0.28146	0.565355	15	AG-957	ABL
0.216572	0.570812	27	JAK Inhib 1	JAK1,2,3
0.202904	0.862745	42	Y27632	ROCK

## Sheet: mTOR only - CVR
	SNP	WT	HET
average sensitivity (medium conc)	0.852983	0.861864	0.861373
average sensitivity (low conc)	0.98334	0.986642	0.986379
average sensitivity (high conc)	0.580242	0.597084	0.592312
range sensitivity (medium conc)	0.013-0.68	0-1.09	0.022-0.76
range sensitivity (low conc)	0.11-0.96	0.066-1.31	0.041-1.09
range sensitivity (high conc)	0.38-1.23	0.42-1.4	0.34-1.29
