# Supplementary material for: A Coding Single-Nucleotide Polymorphism in Lysine Demethylase KDM4A Associates with Increased Sensitivity to mTOR Inhibitors
Source: Oxford University Press journal article supplement (doi:10.1158/2159-8290.cd-14-1159), 2015-01-06
Supplement: 21598290cd141159-sup-138784_1_table_2773911_ng50q3.xlsx [file 21598290cd141159-sup-138784_1_table_2773911_ng50q3.xlsx]

## Sheet: Sheet1
Name	Target	Concentration High	Concentration Med	Concentration Low
A443644	AKT	2.5	0.25	0.025
A770041	SRC	2	0.2	0.02
AG-957	ABL	0	0	0
AG1024	IGF1R	0	0	0
AMG706	VEGFR	2	0.2	0.02
AZ628	RAF	2	0.2	0.02
AZ960	JAK2	3	0.3	0.03
AZD0530/ Saracatinib	SRC	2	0.2	0.02
AZD1152	AURK	20	2	0.2
AZD6244	MEK 1/2	20	2	0.2
AZD6474/Zactima	VEGFR/EGFR/RET	20	2	0.2
BAY65-1942	IKKb	3	0.3	0.03
BEZ235	mTOR, PI3K	0.05	0.005	0.0005
BI-2536	PLK1,2,3	0.5	0.05	0.005
BMS-536924	IGF1R	2	0.2	0.02
Bortezomib	Proteasome	0.02	0.002	0.0002
CGP082996	CDK4	2	0.2	0.02
CGP60474	CDK 1,2,5,7,9	0.5	0.05	0.005
Cisplatin	DNA	1	0.1	0.01
CL-387,785	ERBB2, EGFR	2	0.2	0.02
Cyclopamine	SMO	10	1	0.1
Dasatinib	ABL, SRC	0.5	0.05	0.005
DM3189	BMP1	1	0.1	0.01
Geldanamycin	HSP90	1	0.1	0.01
GNF2	ABL	2	0.2	0.02
Go 6976	PKC	10	1	0.1
Go-6983	PKC	5	0.5	0.05
GSK269962A	ROCK	2.5	0.25	0.025
GSK319347A	IKKe	2.5	0.25	0.025
GST-MDA-7	IL24	10	1	0.1
GW843682X	PLK1	0.5	0.05	0.005
HCQ	Lyzosome	20	2	0.2
HG-3-32-01	KIT, PDGFR	2	0.2	0.02
HKI-272	ERBB2, EGFR	2	0.2	0.02
Honokiol	Ras/PI3K signaling	10	1	0.1
Imatinib	ABL, KIT, PDGFR	2	0.2	0.02
JAK Inhib 1	JAK1,2,3	2	0.2	0.02
JAK2 Inhib2	JAK	10	1	0.1
JW-2-8-1	AURK	2	0.2	0.02
JW-5-8-1	mTOR, PI3K	0.5	0.05	0.005
KIN0001-001	SRC, ABL	2	0.2	0.02
KIN001-127	ITK	2	0.2	0.02
KIN001-128	RSK	2	0.2	0.02
KN-93	CAMK	10	1	0.1
L-685,458	g-secretase	10	1	0.1
Lapatinib	ERBB2, EGFR	5	0.5	0.05
LM-1685	COX2	10	1	0.1
LY294002	mTOR, PI3K	10	1	0.1
MG-132	Proteasome	1	0.1	0.01
MLN4924	NAE	2	0.2	0.02
MLN8054	AURK	2	0.2	0.02
MRK 003	g-secretase	5	0.5	0.05
MS275	HDAC	10	1	0.1
Myoseverin	TUBB	2	0.2	0.02
NVP-TAE684	ALK	2	0.2	0.02
Parthenolide	NF-kB	10	1	0.1
PD-173074	FGFR family	2	0.2	0.02
PD98059	MEK1/2	5	0.5	0.05
PF02341066	ALK, MET	2	0.2	0.02
PHA665752	MET	1	0.1	0.01
Pimozide	STAT3	10	1	0.1
PP 242	mTOR	5	0.5	0.05
Pyrimethamine	STAT3, MATE1/2, DHFR	20	2	0.2
RAD001	mTOR	0.1	0.01	0.001
Ro 31-7453	TUBB	2	0.2	0.02
ROCK inhibitor 1	ROCK	2.5	0.25	0.025
S-Trityl-L-cysteine	Eg5	5	0.5	0.05
Salubrinal	GADD34-PP1C	15	1.5	0.15
SB203580	p38MAPK	10	1	0.1
Seliciclib	CDK	15	1.5	0.15
Sorafenib	KIT, FLT3, RAF	2	0.2	0.02
SU6656	SRC	10	1	0.1
Sunitinib	VEGFR	10	1	0.1
Tarceva, Erlotinib	EGFR	2	0.2	0.02
Taxol	TUBB	0.1	0.01	0.001
TGX 221	PI3Kb	5	0.5	0.05
Torin	mTOR	2.5	0.25	0.025
TP-155	NF-kB	1	0.1	0.01
UO-126	MEK1/2	10	1	0.1
VX680	AURK, FLT3	2	0.2	0.02
WH-4-023	SRC	2	0.2	0.02
WH-4-025	SRC	2	0.2	0.02
WZ-1-84	BMX	2	0.2	0.02
XAV939	TTK (Mitosis)	20	2	0.2
XMD8-85	ERK5	5	0.5	0.05
Y27632	ROCK	5	0.5	0.05
Z-L-L-Norleucine-CHO	g-secretase	5	0.5	0.05
